# Supplementary material for: X-ray crystallographic, luminescence and NMR studies of phenacyldiphenylphosphine oxide with the Ln(iii) ions Sm, Eu, Gd, Tb and Dy
Source: Royal Society of Chemistry journal article supplement (doi:10.1039/c7dt02678a), 2017-01-01

# X-ray crystallographic, luminescence and NMR studies of phenacyldiphenylphosphine oxide with the Ln(III) ions Sm, Eu, Gd, Tb and Dy

## Supplementary Information

Erin Leach,<sup>a</sup> Justin R. Shady,<sup>a</sup> Adam C. Boyden,<sup>a</sup> Anne-lise Emig,<sup>a</sup> Alyssa T. Henry,<sup>b</sup> Emily K. Connor,<sup>b</sup> Richard J. Staples,<sup>c</sup> Stephanie Schaertel,<sup>a</sup> and Eric J. Werner,<sup>b</sup> Shannon M. Biros<sup>a\*</sup>

<sup>a</sup>Department of Chemistry, Grand Valley State University, Allendale, MI 49401, USA;

<sup>b</sup>Department of Chemistry, Biochemistry and Physics, The University of Tampa, 401 W. Kennedy Blvd., Tampa, FL 33606, USA;

<sup>c</sup>Center for Crystallographic Research, Department of Chemistry, Michigan State University, 578 S. Shaw Lane, East Lansing, MI 48824, USA.

\* Corresponding author: Shannon M. Biros, [biross@gvsu.edu](mailto:biross@gvsu.edu), +1.616.331.8955

|                                                                                              |              |
|----------------------------------------------------------------------------------------------|--------------|
| <b>I. X-Ray data</b> .....                                                                   | <b>2-47</b>  |
| A. Tb(NO <sub>3</sub> ) <sub>3</sub> (4) <sub>2</sub> (H <sub>2</sub> O).....                | 2            |
| B. Dy(NO <sub>3</sub> ) <sub>3</sub> (4) <sub>2</sub> (H <sub>2</sub> O).....                | 11           |
| C. Gd(NO <sub>3</sub> ) <sub>3</sub> (4) <sub>2</sub> (H <sub>2</sub> O).....                | 20           |
| D. Eu(NO <sub>3</sub> ) <sub>3</sub> 4 <sub>2</sub> (H <sub>2</sub> O).....                  | 29           |
| E. Eu(NO <sub>3</sub> ) <sub>3</sub> 4 <sub>2</sub> •(CHCl <sub>3</sub> ) <sub>2</sub> ..... | 38           |
| <b>II. Luminescence data</b> .....                                                           | <b>48-50</b> |
| A. Lifetime decay curves.....                                                                | 48           |
| B. Solid state emission spectra.....                                                         | 52           |
| C. Horrocks lifetime decay curves.....                                                       | 55           |
| D. Absorption and excitation spectra.....                                                    | 61           |
| <b>III. NMR, IR and MS data</b> .....                                                        | <b>62-74</b> |
| A. IR data for Ln-4 complexes .....                                                          | 62           |
| B. NMR data for compound <b>2</b> .....                                                      | 69           |
| C. MS data for Ln-4 complexes.....                                                           | 70           |

## I. X-Ray crystallography details

For all figures in this section thermal ellipsoids are shown at the 50% probability level, and the numbering scheme for all atoms but the pendant phenyl rings are shown with a ball and stick model. Standard CPK colors are used throughout, and all non-polar hydrogen atoms have been omitted for clarity.

### A. $\text{Tb}(\text{NO}_3)_3(\text{4})_2(\text{H}_2\text{O})$

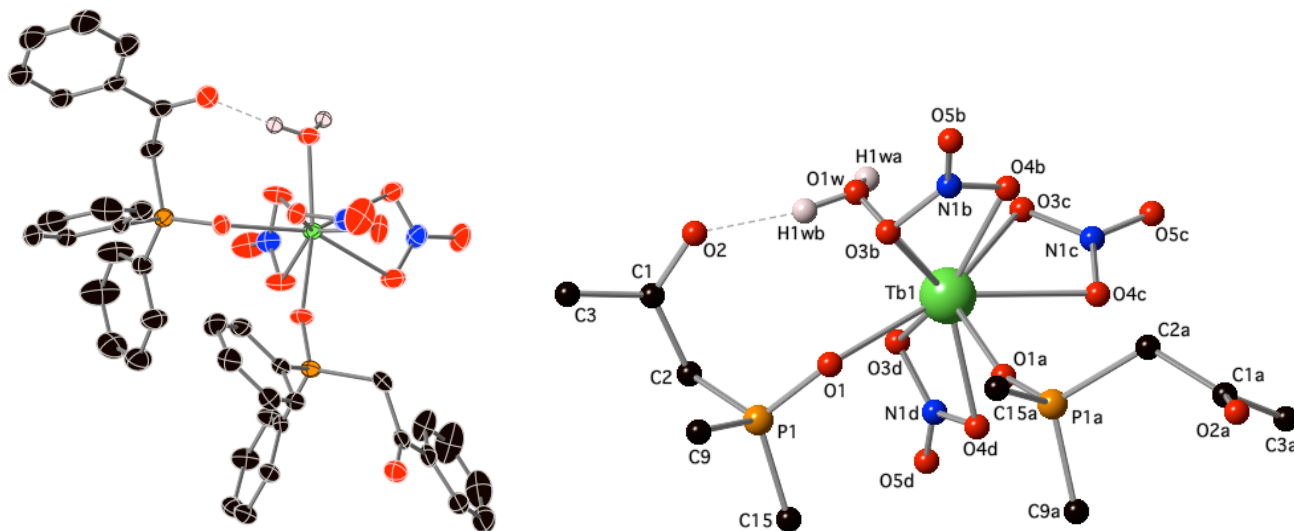

## Experimental

Single crystals of  $\text{C}_{40}\text{H}_{36}\text{N}_3\text{O}_{14}\text{P}_2\text{Tb}$  were grown at 4 °C by slow diffusion of hexane into a solution of the 1:3  $\text{Tb}(\text{NO}_3)_3$ -4 complex in chloroform and used as received. A suitable crystal was selected and mounted using paratone oil on a nylon loop on a Bruker APEX-II CCD diffractometer. The crystal was kept at 173(2) K during data collection. Using Olex2 [1], the structure was solved with the ShelXS [2] structure solution program using Direct Methods and refined with the ShelXL [3] refinement package using Least Squares minimization.

1. Dolomanov, O.V., Bourhis, L.J., Gildea, R.J, Howard, J.A.K. & Puschmann, H. (2009), *J. Appl. Cryst.* 42, 339-341.
2. Sheldrick, G.M. (2008). *Acta Cryst.* A64, 112-122.
3. Sheldrick, G.M. (2015). *Acta Cryst.* C71, 3-8.

### Crystal structure determination of $\text{Tb}(\text{NO}_3)_3(\text{4})_2(\text{H}_2\text{O})$

**Crystal Data** for  $\text{C}_{40}\text{H}_{36}\text{N}_3\text{O}_{14}\text{P}_2\text{Tb}$  ( $M=1003.58$  g/mol): triclinic, space group P-1 (no. 2),  $a = 11.2287(12)$  Å,  $b = 11.6265(12)$  Å,  $c = 18.433(2)$  Å,  $\alpha = 72.0460(10)^\circ$ ,  $\beta = 75.8340(10)^\circ$ ,  $\gamma = 66.6960(10)^\circ$ ,  $V = 2081.6(4)$  Å<sup>3</sup>,  $Z = 2$ ,  $T = 173.15$  K,  $\mu(\text{MoK}\alpha) = 1.846$  mm<sup>-1</sup>,  $D_{\text{calc}} = 1.601$  g/cm<sup>3</sup>, 34436 reflections measured ( $3.926^\circ \leq 2\theta \leq 50.75^\circ$ ), 7587 unique ( $R_{\text{int}} = 0.0518$ ,  $R_{\text{sigma}} = 0.0428$ ) which were used in all calculations. The final  $R_1$  was 0.0293 ( $I > 2\sigma(I)$ ) and  $wR_2$  was 0.0654 (all data).

### Refinement model description

Number of restraints - 0, number of constraints - unknown.

Details:

1. Fixed Uiso

At 1.2 times of:

All C(H) groups, All C(H,H) groups

At 1.5 times of:

All O(H,H) groups

2.a Rotating group:

O1W(H1WA,H1WB)

2.b Secondary CH2 refined with riding coordinates:

C2(H2A,H2B), C2A(H2AA,H2AB)

2.c Aromatic/amide H refined with riding coordinates:

C4(H4), C5(H5), C6(H6), C7(H7), C8(H8), C10(H10), C11(H11), C12(H12),  
 C13(H13), C14(H14), C16(H16), C17(H17), C18(H18), C19(H19), C20(H20), C4A(H4A),  
 C5A(H5A), C6A(H6A), C7A(H7A), C8A(H8A), C10A(H10A), C11A(H11A), C12A(H12A),  
 C13A(H13A), C14A(H14A), C16A(H16A), C17A(H17A), C18A(H18A), C19A(H19A),  
 C20A(H20A)

**Table 1 Crystal data and structure refinement for Tb(NO<sub>3</sub>)<sub>3</sub>(4)<sub>2</sub>(H<sub>2</sub>O)**

|                                             |                                                                                  |
|---------------------------------------------|----------------------------------------------------------------------------------|
| Structure Number                            | 7                                                                                |
| CCDC Number                                 | 1484662                                                                          |
| Empirical formula                           | C <sub>40</sub> H <sub>36</sub> N <sub>3</sub> O <sub>14</sub> P <sub>2</sub> Tb |
| Formula weight                              | 1003.58                                                                          |
| Temperature/K                               | 173.15                                                                           |
| Crystal system                              | triclinic                                                                        |
| Space group                                 | P-1                                                                              |
| a/Å                                         | 11.2287(12)                                                                      |
| b/Å                                         | 11.6265(12)                                                                      |
| c/Å                                         | 18.433(2)                                                                        |
| α/°                                         | 72.0460(10)                                                                      |
| β/°                                         | 75.8340(10)                                                                      |
| γ/°                                         | 66.6960(10)                                                                      |
| Volume/Å <sup>3</sup>                       | 2081.6(4)                                                                        |
| Z                                           | 2                                                                                |
| ρ <sub>calc</sub> /cm <sup>3</sup>          | 1.601                                                                            |
| μ/mm <sup>-1</sup>                          | 1.846                                                                            |
| F(000)                                      | 1008.0                                                                           |
| Crystal size/mm <sup>3</sup>                | 0.286 × 0.102 × 0.095                                                            |
| Radiation                                   | MoKα (λ = 0.71073)                                                               |
| 2θ range for data collection/°              | 3.926 to 50.75                                                                   |
| Index ranges                                | -13 ≤ h ≤ 13, -13 ≤ k ≤ 14, -22 ≤ l ≤ 22                                         |
| Reflections collected                       | 34436                                                                            |
| Independent reflections                     | 7587 [R <sub>int</sub> = 0.0518, R <sub>sigma</sub> = 0.0428]                    |
| Data/restraints/parameters                  | 7587/0/542                                                                       |
| Goodness-of-fit on F <sup>2</sup>           | 1.055                                                                            |
| Final R indexes [I ≥ 2σ (I)]                | R <sub>1</sub> = 0.0293, wR <sub>2</sub> = 0.0618                                |
| Final R indexes [all data]                  | R <sub>1</sub> = 0.0371, wR <sub>2</sub> = 0.0654                                |
| Largest diff. peak/hole / e Å <sup>-3</sup> | 1.05/-0.41                                                                       |

Table 2 Fractional Atomic Coordinates (×10<sup>4</sup>) and Equivalent Isotropic Displacement Parameters (Å<sup>2</sup>×10<sup>3</sup>) for Tb(NO<sub>3</sub>)<sub>3</sub>(4)<sub>2</sub>(H<sub>2</sub>O). U<sub>eq</sub> is defined as 1/3 of the trace of the orthogonalised U<sub>ij</sub> tensor.

| Atom | x         | y          | z          | U(eq)     |
|------|-----------|------------|------------|-----------|
| Tb1  | 5173.3(2) | 8888.3(2)  | 6775.7(2)  | 21.38(6)  |
| P1   | 5441.8(8) | 12003.5(8) | 6670.1(5)  | 21.92(19) |
| O1   | 5093(2)   | 10818(2)   | 6887.7(12) | 26.9(5)   |
| O2   | 2872(2)   | 12783(2)   | 5846.5(15) | 39.5(6)   |
| C1   | 3414(3)   | 13510(3)   | 5839.9(19) | 28.8(8)   |
| C2   | 4890(3)   | 13032(3)   | 5760.1(19) | 28.4(8)   |
| C3   | 2612(3)   | 14838(3)   | 5931.4(18) | 28.6(8)   |

|      |           |           |             |           |
|------|-----------|-----------|-------------|-----------|
| C4   | 1256(4)   | 15216(3)  | 5980(2)     | 40.2(9)   |
| C5   | 454(4)    | 16425(4)  | 6100(2)     | 50.7(11)  |
| C6   | 1003(4)   | 17247(4)  | 6170(2)     | 50.3(11)  |
| C7   | 2323(4)   | 16894(4)  | 6124(2)     | 42.6(10)  |
| C8   | 3142(4)   | 15689(3)  | 6006.0(19)  | 33.9(9)   |
| C9   | 4601(3)   | 12947(3)  | 7365.0(17)  | 22.4(7)   |
| C10  | 3392(3)   | 12883(3)  | 7749.8(19)  | 32.0(8)   |
| C11  | 2646(4)   | 13724(4)  | 8213(2)     | 46.0(11)  |
| C12  | 3093(5)   | 14620(4)  | 8285(2)     | 52.0(12)  |
| C13  | 4278(5)   | 14684(3)  | 7905(2)     | 47.8(11)  |
| C14  | 5050(4)   | 13846(3)  | 7446(2)     | 33.6(9)   |
| C15  | 7158(3)   | 11661(3)  | 6605.1(19)  | 27.5(8)   |
| C16  | 7894(4)   | 12224(4)  | 5999(2)     | 50.3(11)  |
| C17  | 9221(4)   | 11897(5)  | 6008(3)     | 61.5(13)  |
| C18  | 9806(4)   | 11015(4)  | 6618(3)     | 52.0(11)  |
| C19  | 9076(4)   | 10468(4)  | 7232(3)     | 52.6(12)  |
| C20  | 7763(4)   | 10771(4)  | 7222(2)     | 44.4(10)  |
| P1A  | 6134.6(8) | 7362.9(8) | 8741.3(5)   | 21.01(19) |
| O1A  | 5924(2)   | 8108(2)   | 7932.8(12)  | 27.8(5)   |
| O2A  | 6792(2)   | 4484(2)   | 10067.2(14) | 34.8(6)   |
| C1A  | 6974(3)   | 4652(3)   | 9369(2)     | 25.4(8)   |
| C2A  | 6011(3)   | 5796(3)   | 8896.2(19)  | 26.3(8)   |
| C3A  | 8106(3)   | 3755(3)   | 8971(2)     | 29.0(8)   |
| C4A  | 8524(4)   | 4072(4)   | 8193(2)     | 48.8(11)  |
| C5A  | 9595(5)   | 3208(5)   | 7854(3)     | 70.1(15)  |
| C6A  | 10226(4)  | 2021(5)   | 8288(3)     | 65.7(15)  |
| C7A  | 9816(4)   | 1688(4)   | 9055(3)     | 53.8(12)  |
| C8A  | 8756(4)   | 2544(3)   | 9409(2)     | 39.8(10)  |
| C9A  | 7734(3)   | 7134(3)   | 8899.2(18)  | 20.3(7)   |
| C10A | 8674(3)   | 7280(3)   | 8261(2)     | 30.7(8)   |
| C11A | 9903(3)   | 7134(4)   | 8370(2)     | 36.8(9)   |
| C12A | 10202(3)  | 6845(3)   | 9101(2)     | 33.3(9)   |
| C13A | 9274(3)   | 6680(3)   | 9732(2)     | 30.9(8)   |
| C14A | 8047(3)   | 6824(3)   | 9630.8(19)  | 25.4(8)   |
| C15A | 4950(3)   | 8197(3)   | 9425.8(18)  | 22.1(7)   |
| C16A | 4308(3)   | 9516(3)   | 9162(2)     | 30.0(8)   |
| C17A | 3410(4)   | 10214(3)  | 9667(2)     | 36.6(9)   |
| C18A | 3145(4)   | 9611(4)   | 10428(2)    | 37.3(9)   |
| C19A | 3786(3)   | 8301(3)   | 10693(2)    | 31.4(8)   |
| C20A | 4678(3)   | 7595(3)   | 10188.6(18) | 25.8(8)   |
| O3B  | 3146(2)   | 9727(2)   | 7640.9(13)  | 28.5(5)   |
| O4B  | 3605(3)   | 7821(2)   | 7500.5(16)  | 43.1(7)   |
| O5B  | 1893(3)   | 8631(3)   | 8281.9(19)  | 65.5(9)   |
| N1B  | 2848(3)   | 8725(3)   | 7822.8(18)  | 33.9(7)   |
| O3C  | 5215(3)   | 7661(2)   | 5886.7(14)  | 42.2(7)   |
| O4C  | 6370(3)   | 6563(2)   | 6804.4(14)  | 41.0(7)   |
| O5C  | 6313(3)   | 5628(2)   | 5958.3(15)  | 44.7(7)   |
| N1C  | 5980(3)   | 6579(3)   | 6209.1(17)  | 32.8(7)   |
| O3D  | 6341(2)   | 9761(2)   | 5527.5(13)  | 35.6(6)   |
| O4D  | 7522(2)   | 8619(2)   | 6429.3(13)  | 36.6(6)   |
| O5D  | 8419(3)   | 9477(3)   | 5315.1(15)  | 50.9(8)   |
| N1D  | 7478(3)   | 9280(3)   | 5739.7(17)  | 32.7(7)   |

Table 3 Anisotropic Displacement Parameters ( $\text{\AA}^2 \times 10^3$ ) for **Tb(NO<sub>3</sub>)<sub>3</sub>(4)<sub>2</sub>(H<sub>2</sub>O)**. The Anisotropic displacement factor exponent takes the form:  $-2\pi^2[h^2a^{*2}U_{11}+2hka^*b^*U_{12}+\dots]$ .

| Atom | U <sub>11</sub> | U <sub>22</sub> | U <sub>33</sub> | U <sub>23</sub> | U <sub>13</sub> | U <sub>12</sub> |
|------|-----------------|-----------------|-----------------|-----------------|-----------------|-----------------|
| Tb1  | 23.97(10)       | 20.11(9)        | 18.31(9)        | -6.45(6)        | -6.43(6)        | -2.41(7)        |
| P1   | 25.1(5)         | 22.0(4)         | 17.2(4)         | -5.1(3)         | -3.0(4)         | -6.3(4)         |
| O1   | 33.0(14)        | 23.4(12)        | 27.1(13)        | -10.2(10)       | -5.3(11)        | -8.8(10)        |
| O2   | 38.1(15)        | 30.2(14)        | 51.2(17)        | -12.3(12)       | -14.9(13)       | -5.7(12)        |
| C1   | 31(2)           | 30.3(19)        | 19.6(18)        | -3.8(15)        | -6.9(15)        | -4.3(16)        |
| C2   | 30(2)           | 27.4(18)        | 21.4(18)        | -5.8(15)        | -4.2(15)        | -2.5(15)        |
| C3   | 31(2)           | 27.7(18)        | 18.5(18)        | -1.3(14)        | -8.4(15)        | -1.1(15)        |
| C4   | 38(2)           | 33(2)           | 44(2)           | -8.0(18)        | -8.5(19)        | -5.3(18)        |
| C5   | 35(2)           | 44(2)           | 59(3)           | -17(2)          | -11(2)          | 7(2)            |
| C6   | 56(3)           | 33(2)           | 51(3)           | -18(2)          | -17(2)          | 7(2)            |
| C7   | 55(3)           | 34(2)           | 39(2)           | -7.8(18)        | -18(2)          | -9(2)           |
| C8   | 40(2)           | 31(2)           | 27(2)           | -1.8(16)        | -11.0(17)       | -9.6(17)        |
| C9   | 31.1(19)        | 18.2(16)        | 16.0(17)        | -2.8(13)        | -5.7(14)        | -6.1(14)        |
| C10  | 35(2)           | 34(2)           | 21.9(19)        | -6.1(16)        | -4.2(16)        | -7.7(17)        |
| C11  | 41(2)           | 57(3)           | 27(2)           | -16(2)          | 1.2(18)         | -3(2)           |
| C12  | 62(3)           | 46(3)           | 37(2)           | -27(2)          | -21(2)          | 14(2)           |
| C13  | 73(3)           | 24(2)           | 52(3)           | -15.2(19)       | -36(2)          | -3(2)           |
| C14  | 46(2)           | 27.4(19)        | 31(2)           | -2.1(16)        | -18.9(18)       | -11.4(17)       |
| C15  | 27.7(19)        | 29.1(19)        | 25.1(19)        | -7.4(15)        | -3.8(15)        | -8.3(15)        |
| C16  | 30(2)           | 73(3)           | 32(2)           | 3(2)            | -1.3(18)        | -15(2)          |
| C17  | 34(2)           | 90(4)           | 43(3)           | 3(3)            | 5(2)            | -24(2)          |
| C18  | 27(2)           | 61(3)           | 65(3)           | -20(2)          | -7(2)           | -9(2)           |
| C19  | 42(3)           | 50(3)           | 62(3)           | 8(2)            | -27(2)          | -17(2)          |
| C20  | 35(2)           | 47(2)           | 47(3)           | 12(2)           | -17.8(19)       | -20.7(19)       |
| P1A  | 21.3(4)         | 23.2(4)         | 17.9(4)         | -5.3(3)         | -5.1(3)         | -5.4(4)         |
| O1A  | 30.0(13)        | 32.9(13)        | 17.8(12)        | -5.3(10)        | -8.5(10)        | -5.6(11)        |
| O2A  | 40.1(15)        | 38.1(14)        | 28.3(15)        | -7.9(11)        | -7.1(12)        | -14.4(12)       |
| C1A  | 28.6(19)        | 27.2(18)        | 27(2)           | -7.3(15)        | -6.0(15)        | -15.1(15)       |
| C2A  | 24.0(18)        | 31.7(19)        | 27.3(19)        | -13.0(15)       | -5.3(15)        | -8.5(15)        |
| C3A  | 28.8(19)        | 26.1(18)        | 39(2)           | -12.2(16)       | -5.5(16)        | -13.1(16)       |
| C4A  | 52(3)           | 34(2)           | 51(3)           | -15(2)          | 7(2)            | -11(2)          |
| C5A  | 73(4)           | 57(3)           | 68(3)           | -32(3)          | 28(3)           | -20(3)          |
| C6A  | 39(3)           | 53(3)           | 109(5)          | -48(3)          | 7(3)            | -9(2)           |
| C7A  | 39(3)           | 34(2)           | 93(4)           | -24(2)          | -24(3)          | -2(2)           |
| C8A  | 34(2)           | 32(2)           | 58(3)           | -14.9(19)       | -20(2)          | -5.6(18)        |
| C9A  | 22.9(17)        | 18.2(16)        | 21.8(18)        | -4.3(13)        | -5.0(14)        | -8.3(14)        |
| C10A | 30(2)           | 40(2)           | 22.3(19)        | -4.5(16)        | -5.4(15)        | -12.5(17)       |
| C11A | 26(2)           | 51(2)           | 29(2)           | -6.4(18)        | 1.3(16)         | -14.4(18)       |
| C12A | 25.1(19)        | 39(2)           | 39(2)           | -11.3(17)       | -8.1(17)        | -11.0(17)       |
| C13A | 32(2)           | 37(2)           | 26(2)           | -4.8(16)        | -7.6(16)        | -14.7(17)       |
| C14A | 24.8(18)        | 31.3(19)        | 21.2(18)        | -6.8(15)        | -3.1(14)        | -10.6(15)       |
| C15A | 19.6(17)        | 27.0(17)        | 22.0(18)        | -7.5(14)        | -4.5(14)        | -8.2(14)        |
| C16A | 36(2)           | 29.4(19)        | 23.9(19)        | -7.3(15)        | -9.7(16)        | -6.7(16)        |
| C17A | 38(2)           | 28.0(19)        | 37(2)           | -13.2(17)       | -6.2(18)        | 0.2(17)         |
| C18A | 32(2)           | 45(2)           | 36(2)           | -23.4(19)       | -1.0(17)        | -6.9(18)        |
| C19A | 34(2)           | 39(2)           | 24.2(19)        | -9.2(16)        | 0.7(16)         | -17.4(17)       |

|      |          |          |          |           |           |           |
|------|----------|----------|----------|-----------|-----------|-----------|
| C20A | 25.3(19) | 26.7(18) | 25.6(19) | -6.0(15)  | -6.6(15)  | -7.6(15)  |
| O3B  | 26.5(13) | 25.3(13) | 31.1(14) | -8.8(11)  | -1.3(11)  | -6.5(10)  |
| O4B  | 44.9(16) | 26.0(13) | 61.5(19) | -15.9(13) | -2.5(14)  | -14.3(12) |
| O5B  | 41.6(18) | 63(2)    | 83(2)    | -10.5(18) | 18.8(17)  | -31.0(16) |
| N1B  | 31.3(18) | 34.5(18) | 34.7(18) | -2.2(15)  | -4.9(15)  | -14.5(15) |
| O3C  | 66.9(19) | 23.9(13) | 34.5(15) | -10.5(11) | -26.5(14) | -0.5(13)  |
| O4C  | 50.4(17) | 30.9(14) | 38.0(16) | -13.0(12) | -22.1(13) | 2.6(12)   |
| O5C  | 65.0(19) | 28.0(14) | 41.3(16) | -18.8(12) | -4.1(14)  | -10.2(13) |
| N1C  | 41.7(19) | 27.4(17) | 28.1(17) | -10.4(14) | -0.9(14)  | -10.2(14) |
| O3D  | 25.7(14) | 54.3(16) | 21.1(13) | -8.3(12)  | -4.8(11)  | -7.8(12)  |
| O4D  | 27.0(14) | 42.6(15) | 24.8(14) | 0.1(12)   | -6.7(11)  | -0.5(11)  |
| O5D  | 30.0(15) | 71(2)    | 35.0(16) | -5.6(14)  | 9.7(13)   | -14.1(14) |
| N1D  | 29.3(18) | 35.3(17) | 28.1(18) | -14.0(14) | -0.2(15)  | -3.0(14)  |
| O1W  | 30.7(13) | 26.4(12) | 23.5(13) | -7.4(10)  | -10(1)    | -2.5(10)  |

Table 4 Bond Lengths for **Tb(NO<sub>3</sub>)<sub>3</sub>(4)<sub>2</sub>(H<sub>2</sub>O)**

| Atom | Atom | Length/Å | Atom | Atom | Length/Å |
|------|------|----------|------|------|----------|
| Tb1  | O1   | 2.281(2) | C19  | C20  | 1.377(5) |
| Tb1  | O1A  | 2.273(2) | P1A  | O1A  | 1.497(2) |
| Tb1  | O3B  | 2.470(2) | P1A  | C2A  | 1.811(3) |
| Tb1  | O4B  | 2.445(3) | P1A  | C9A  | 1.792(3) |
| Tb1  | N1B  | 2.877(3) | P1A  | C15A | 1.793(3) |
| Tb1  | O3C  | 2.464(2) | O2A  | C1A  | 1.218(4) |
| Tb1  | O4C  | 2.488(2) | C1A  | C2A  | 1.519(4) |
| Tb1  | N1C  | 2.909(3) | C1A  | C3A  | 1.486(5) |
| Tb1  | O3D  | 2.485(2) | C3A  | C4A  | 1.377(5) |
| Tb1  | O4D  | 2.472(2) | C3A  | C8A  | 1.393(5) |
| Tb1  | N1D  | 2.921(3) | C4A  | C5A  | 1.382(6) |
| Tb1  | O1W  | 2.358(2) | C5A  | C6A  | 1.367(7) |
| P1   | O1   | 1.491(2) | C6A  | C7A  | 1.359(7) |
| P1   | C2   | 1.820(3) | C7A  | C8A  | 1.384(5) |
| P1   | C9   | 1.786(3) | C9A  | C10A | 1.392(4) |
| P1   | C15  | 1.788(3) | C9A  | C14A | 1.380(4) |
| O2   | C1   | 1.217(4) | C10A | C11A | 1.379(5) |
| C1   | C2   | 1.511(5) | C11A | C12A | 1.376(5) |
| C1   | C3   | 1.486(5) | C12A | C13A | 1.380(5) |
| C3   | C4   | 1.396(5) | C13A | C14A | 1.373(5) |
| C3   | C8   | 1.393(5) | C15A | C16A | 1.395(4) |
| C4   | C5   | 1.388(5) | C15A | C20A | 1.383(4) |
| C5   | C6   | 1.375(6) | C16A | C17A | 1.378(5) |
| C6   | C7   | 1.360(6) | C17A | C18A | 1.379(5) |
| C7   | C8   | 1.389(5) | C18A | C19A | 1.386(5) |
| C9   | C10  | 1.389(5) | C19A | C20A | 1.380(4) |
| C9   | C14  | 1.386(4) | O3B  | N1B  | 1.262(3) |
| C10  | C11  | 1.380(5) | O4B  | N1B  | 1.269(4) |
| C11  | C12  | 1.373(6) | O5B  | N1B  | 1.213(4) |
| C12  | C13  | 1.363(6) | O3C  | N1C  | 1.268(4) |
| C13  | C14  | 1.377(5) | O4C  | N1C  | 1.270(4) |
| C15  | C16  | 1.373(5) | O5C  | N1C  | 1.216(3) |
| C15  | C20  | 1.386(5) | O3D  | N1D  | 1.281(4) |

C16 C17 1.388(5) O4D N1D 1.268(4)  
 C17 C18 1.365(6) O5D N1D 1.207(4)  
 C18 C19 1.368(6)

Table 5 Bond Angles for **Tb(NO<sub>3</sub>)<sub>3</sub>(4)<sub>2</sub>(H<sub>2</sub>O)**

| Atom | Atom | Atom | Angle/°   | Atom | Atom | Atom | Angle/°    |
|------|------|------|-----------|------|------|------|------------|
| O1   | Tb1  | O3B  | 72.63(8)  | C5   | C4   | C3   | 120.1(4)   |
| O1   | Tb1  | O4B  | 124.28(8) | C6   | C5   | C4   | 119.7(4)   |
| O1   | Tb1  | N1B  | 98.36(8)  | C7   | C6   | C5   | 121.0(4)   |
| O1   | Tb1  | O3C  | 145.58(8) | C6   | C7   | C8   | 120.3(4)   |
| O1   | Tb1  | O4C  | 150.88(8) | C7   | C8   | C3   | 119.9(4)   |
| O1   | Tb1  | N1C  | 160.31(8) | C10  | C9   | P1   | 118.1(3)   |
| O1   | Tb1  | O3D  | 75.70(8)  | C14  | C9   | P1   | 121.1(3)   |
| O1   | Tb1  | O4D  | 80.14(8)  | C14  | C9   | C10  | 120.2(3)   |
| O1   | Tb1  | N1D  | 76.49(8)  | C11  | C10  | C9   | 119.2(4)   |
| O1   | Tb1  | O1W  | 83.04(8)  | C12  | C11  | C10  | 120.2(4)   |
| O1A  | Tb1  | O1   | 84.21(8)  | C13  | C12  | C11  | 120.5(4)   |
| O1A  | Tb1  | O3B  | 78.95(8)  | C12  | C13  | C14  | 120.5(4)   |
| O1A  | Tb1  | O4B  | 80.94(9)  | C13  | C14  | C9   | 119.3(4)   |
| O1A  | Tb1  | N1B  | 78.26(8)  | C16  | C15  | P1   | 124.7(3)   |
| O1A  | Tb1  | O3C  | 128.00(8) | C16  | C15  | C20  | 118.8(3)   |
| O1A  | Tb1  | O4C  | 77.41(8)  | C20  | C15  | P1   | 116.5(3)   |
| O1A  | Tb1  | N1C  | 102.81(8) | C15  | C16  | C17  | 120.1(4)   |
| O1A  | Tb1  | O3D  | 126.17(8) | C18  | C17  | C16  | 120.4(4)   |
| O1A  | Tb1  | O4D  | 76.47(8)  | C17  | C18  | C19  | 120.0(4)   |
| O1A  | Tb1  | N1D  | 101.20(8) | C18  | C19  | C20  | 120.0(4)   |
| O1A  | Tb1  | O1W  | 151.55(8) | C19  | C20  | C15  | 120.7(4)   |
| O3B  | Tb1  | N1B  | 25.90(7)  | O1A  | P1A  | C2A  | 109.42(14) |
| O3B  | Tb1  | O4C  | 124.44(8) | O1A  | P1A  | C9A  | 110.03(14) |
| O3B  | Tb1  | N1C  | 126.52(8) | O1A  | P1A  | C15A | 111.15(14) |
| O3B  | Tb1  | O3D  | 136.75(8) | C9A  | P1A  | C2A  | 108.58(14) |
| O3B  | Tb1  | O4D  | 144.81(8) | C9A  | P1A  | C15A | 108.25(15) |
| O3B  | Tb1  | N1D  | 148.95(8) | C15A | P1A  | C2A  | 109.35(15) |
| O4B  | Tb1  | O3B  | 51.90(8)  | P1A  | O1A  | Tb1  | 161.87(15) |
| O4B  | Tb1  | N1B  | 26.00(8)  | O2A  | C1A  | C2A  | 119.1(3)   |
| O4B  | Tb1  | O3C  | 78.23(9)  | O2A  | C1A  | C3A  | 121.5(3)   |
| O4B  | Tb1  | O4C  | 75.08(9)  | C3A  | C1A  | C2A  | 119.3(3)   |
| O4B  | Tb1  | N1C  | 75.28(8)  | C1A  | C2A  | P1A  | 117.1(2)   |
| O4B  | Tb1  | O3D  | 150.17(9) | C4A  | C3A  | C1A  | 122.6(3)   |
| O4B  | Tb1  | O4D  | 144.69(8) | C4A  | C3A  | C8A  | 119.3(3)   |
| O4B  | Tb1  | N1D  | 159.15(8) | C8A  | C3A  | C1A  | 118.1(3)   |
| N1B  | Tb1  | N1C  | 101.07(9) | C3A  | C4A  | C5A  | 120.2(4)   |
| N1B  | Tb1  | N1D  | 174.85(8) | C6A  | C5A  | C4A  | 120.0(5)   |
| O3C  | Tb1  | O3B  | 120.30(9) | C7A  | C6A  | C5A  | 120.4(4)   |
| O3C  | Tb1  | N1B  | 99.98(9)  | C6A  | C7A  | C8A  | 120.6(4)   |
| O3C  | Tb1  | O4C  | 51.35(8)  | C7A  | C8A  | C3A  | 119.4(4)   |
| O3C  | Tb1  | N1C  | 25.62(8)  | C10A | C9A  | P1A  | 118.4(2)   |
| O3C  | Tb1  | O3D  | 74.75(9)  | C14A | C9A  | P1A  | 121.8(2)   |
| O3C  | Tb1  | O4D  | 94.74(9)  | C14A | C9A  | C10A | 119.8(3)   |
| O3C  | Tb1  | N1D  | 84.43(9)  | C11A | C10A | C9A  | 119.3(3)   |

|     |     |     |            |      |      |      |           |
|-----|-----|-----|------------|------|------|------|-----------|
| O4C | Tb1 | N1B | 99.74(9)   | C12A | C11A | C10A | 120.6(3)  |
| O4C | Tb1 | N1C | 25.72(8)   | C11A | C12A | C13A | 119.9(3)  |
| O4C | Tb1 | N1D | 85.08(9)   | C14A | C13A | C12A | 120.0(3)  |
| N1C | Tb1 | N1D | 84.06(8)   | C13A | C14A | C9A  | 120.4(3)  |
| O3D | Tb1 | N1B | 153.04(8)  | C16A | C15A | P1A  | 117.1(2)  |
| O3D | Tb1 | O4C | 97.17(8)   | C20A | C15A | P1A  | 122.9(2)  |
| O3D | Tb1 | N1C | 85.47(8)   | C20A | C15A | C16A | 120.0(3)  |
| O3D | Tb1 | N1D | 25.85(7)   | C17A | C16A | C15A | 119.7(3)  |
| O4D | Tb1 | N1B | 154.71(8)  | C16A | C17A | C18A | 120.2(3)  |
| O4D | Tb1 | O4C | 73.76(9)   | C17A | C18A | C19A | 120.3(3)  |
| O4D | Tb1 | N1C | 83.64(8)   | C20A | C19A | C18A | 119.8(3)  |
| O4D | Tb1 | O3D | 51.35(7)   | C19A | C20A | C15A | 120.1(3)  |
| O4D | Tb1 | N1D | 25.50(7)   | N1B  | O3B  | Tb1  | 95.36(18) |
| O1W | Tb1 | O3B | 72.99(8)   | N1B  | O4B  | Tb1  | 96.36(19) |
| O1W | Tb1 | O4B | 85.43(8)   | O3B  | N1B  | Tb1  | 58.74(16) |
| O1W | Tb1 | N1B | 78.58(8)   | O3B  | N1B  | O4B  | 116.3(3)  |
| O1W | Tb1 | O3C | 72.44(8)   | O4B  | N1B  | Tb1  | 57.64(16) |
| O1W | Tb1 | O4C | 122.86(8)  | O5B  | N1B  | Tb1  | 177.9(3)  |
| O1W | Tb1 | N1C | 97.65(8)   | O5B  | N1B  | O3B  | 121.8(3)  |
| O1W | Tb1 | O3D | 74.63(8)   | O5B  | N1B  | O4B  | 121.9(3)  |
| O1W | Tb1 | O4D | 125.79(8)  | N1C  | O3C  | Tb1  | 97.18(18) |
| O1W | Tb1 | N1D | 100.38(8)  | N1C  | O4C  | Tb1  | 95.99(18) |
| O1  | P1  | C2  | 110.85(15) | O3C  | N1C  | Tb1  | 57.19(15) |
| O1  | P1  | C9  | 109.91(14) | O3C  | N1C  | O4C  | 115.5(3)  |
| O1  | P1  | C15 | 112.98(14) | O4C  | N1C  | Tb1  | 58.29(15) |
| C9  | P1  | C2  | 105.51(15) | O5C  | N1C  | Tb1  | 178.8(2)  |
| C9  | P1  | C15 | 108.07(15) | O5C  | N1C  | O3C  | 121.7(3)  |
| C15 | P1  | C2  | 109.21(16) | O5C  | N1C  | O4C  | 122.8(3)  |
| P1  | O1  | Tb1 | 156.21(14) | N1D  | O3D  | Tb1  | 96.40(19) |
| O2  | C1  | C2  | 119.3(3)   | N1D  | O4D  | Tb1  | 97.45(19) |
| O2  | C1  | C3  | 119.5(3)   | O3D  | N1D  | Tb1  | 57.75(16) |
| C3  | C1  | C2  | 121.2(3)   | O4D  | N1D  | Tb1  | 57.05(16) |
| C1  | C2  | P1  | 110.2(2)   | O4D  | N1D  | O3D  | 114.8(3)  |
| C4  | C3  | C1  | 117.6(3)   | O5D  | N1D  | Tb1  | 178.1(2)  |
| C8  | C3  | C1  | 123.3(3)   | O5D  | N1D  | O3D  | 121.9(3)  |
| C8  | C3  | C4  | 119.0(3)   | O5D  | N1D  | O4D  | 123.3(3)  |

Table 6 Hydrogen Bonds for **Tb(NO<sub>3</sub>)<sub>3</sub>(4)<sub>2</sub>(H<sub>2</sub>O)**

| D   | H    | A                | d(D-H)/Å | d(H-A)/Å | d(D-A)/Å | D-H-A/° |
|-----|------|------------------|----------|----------|----------|---------|
| O1W | H1WA | O3D <sup>1</sup> | 0.89     | 1.91     | 2.755(3) | 158.1   |
| O1W | H1WB | O2               | 0.89     | 1.84     | 2.727(3) | 172.0   |

<sup>1</sup>1-X,2-Y,1-Z

Table 7 Torsion Angles for **Tb(NO<sub>3</sub>)<sub>3</sub>(4)<sub>2</sub>(H<sub>2</sub>O)**

| A   | B   | C   | D   | Angle/°   | A   | B   | C   | D   | Angle/° |
|-----|-----|-----|-----|-----------|-----|-----|-----|-----|---------|
| Tb1 | O3B | N1B | O4B | -2.1(3)   | C15 | C16 | C17 | C18 | 0.0(7)  |
| Tb1 | O3B | N1B | O5B | 177.7(3)  | C16 | C15 | C20 | C19 | 0.8(6)  |
| Tb1 | O4B | N1B | O3B | 2.2(3)    | C16 | C17 | C18 | C19 | -1.4(7) |
| Tb1 | O4B | N1B | O5B | -177.6(3) | C17 | C18 | C19 | C20 | 2.5(7)  |
| Tb1 | O3C | N1C | O4C | 0.4(3)    | C18 | C19 | C20 | C15 | -2.2(7) |



Tb1 O3C N1C O5C -179.3(3) C20 C15 C16 C17 0.3(6)  
 Tb1 O4C N1C O3C -0.4(3) P1A C9A C10A C11A 178.7(3)  
 Tb1 O4C N1C O5C 179.3(3) P1A C9A C14A C13A -178.7(3)  
 Tb1 O3DN1DO4D 0.4(3) P1A C15A C16A C17A -178.5(3)  
 Tb1 O3DN1DO5D -177.8(3) P1A C15A C20A C19A 177.9(3)  
 Tb1 O4DN1DO3D -0.4(3) O1A P1A C2A C1A 140.3(2)  
 Tb1 O4DN1DO5D 177.8(3) O1A P1A C9A C10A -19.0(3)  
 P1 C9 C10 C11 -171.5(3) O1A P1A C9A C14A 160.8(2)  
 P1 C9 C14 C13 170.5(3) O1A P1A C15A C16A -19.8(3)  
 P1 C15 C16 C17 179.5(3) O1A P1A C15A C20A 161.4(3)  
 P1 C15 C20 C19 -178.4(3) O2A C1A C2A P1A 77.3(4)  
 O1 P1 C2 C1 64.0(3) O2A C1A C3A C4A -163.6(4)  
 O1 P1 C9 C10 -29.7(3) O2A C1A C3A C8A 16.8(5)  
 O1 P1 C9 C14 158.8(3) C1A C3A C4A C5A 179.1(4)  
 O1 P1 C15 C16 131.6(3) C1A C3A C8A C7A -179.9(3)  
 O1 P1 C15 C20 -49.2(3) C2A P1A O1A Tb1 33.6(5)  
 O2 C1 C2 P1 -76.6(4) C2A P1A C9A C10A 100.7(3)  
 O2 C1 C3 C4 -3.4(5) C2A P1A C9A C14A -79.5(3)  
 O2 C1 C3 C8 173.5(3) C2A P1A C15A C16A -140.7(3)  
 C1 C3 C4 C5 177.2(3) C2A P1A C15A C20A 40.4(3)  
 C1 C3 C8 C7 -177.1(3) C2A C1A C3A C4A 17.2(5)  
 C2 P1 O1 Tb1 66.3(4) C2A C1A C3A C8A -162.4(3)  
 C2 P1 C9 C10 89.8(3) C3A C1A C2A P1A -103.5(3)  
 C2 P1 C9 C14 -81.6(3) C3A C4A C5A C6A 1.5(7)  
 C2 P1 C15 C16 7.7(4) C4A C3A C8A C7A 0.5(5)  
 C2 P1 C15 C20 -173.1(3) C4A C5A C6A C7A -0.7(8)  
 C2 C1 C3 C4 178.3(3) C5A C6A C7A C8A -0.2(7)  
 C2 C1 C3 C8 -4.8(5) C6A C7A C8A C3A 0.3(6)  
 C3 C1 C2 P1 101.7(3) C8A C3A C4A C5A -1.4(6)  
 C3 C4 C5 C6 0.0(6) C9A P1A O1A Tb1 152.8(4)  
 C4 C3 C8 C7 -0.3(5) C9A P1A C2A C1A 20.1(3)  
 C4 C5 C6 C7 -0.1(7) C9A P1A C15A C16A 101.2(3)  
 C5 C6 C7 C8 -0.1(6) C9A P1A C15A C20A -77.7(3)  
 C6 C7 C8 C3 0.2(6) C9A C10A C11A C12A 0.1(5)  
 C8 C3 C4 C5 0.1(5) C10A C9A C14A C13A 1.1(5)  
 C9 P1 O1 Tb1 -177.4(3) C10A C11A C12A C13A 1.1(6)  
 C9 P1 C2 C1 -55.0(3) C11A C12A C13A C14A -1.1(5)  
 C9 P1 C15 C16 -106.6(3) C12A C13A C14A C9A 0.0(5)  
 C9 P1 C15 C20 72.6(3) C14A C9A C10A C11A -1.1(5)  
 C9 C10 C11 C12 0.5(5) C15A P1A O1A Tb1 -87.3(5)  
 C10 C9 C14 C13 -0.7(5) C15A P1A C2A C1A -97.8(3)  
 C10 C11 C12 C13 -0.3(6) C15A P1A C9A C10A -140.7(3)  
 C11 C12 C13 C14 -0.5(6) C15A P1A C9A C14A 39.1(3)  
 C12 C13 C14 C9 1.0(5) C15A C16A C17A C18A -0.2(5)  
 C14 C9 C10 C11 0.0(5) C16A C15A C20A C19A -1.0(5)  
 C15 P1 O1 Tb1 -56.6(4) C16A C17A C18A C19A 0.5(6)  
 C15 P1 C2 C1 -170.9(2) C17A C18A C19A C20A -1.0(5)  
 C15 P1 C9 C10 -153.4(3) C18A C19A C20A C15A 1.3(5)  
 C15 P1 C9 C14 35.1(3) C20A C15A C16A C17A 0.4(5)

Table 8 Hydrogen Atom Coordinates ( $\text{\AA}\times 10^4$ ) and Isotropic Displacement Parameters ( $\text{\AA}^2\times 10^3$ ) for  $\text{Tb}(\text{NO}_3)_3(\mathbf{4})_2(\text{H}_2\text{O})$ 

| Atom | x     | y     | z     | U(eq) |
|------|-------|-------|-------|-------|
| H2A  | 5195  | 13776 | 5604  | 34    |
| H2B  | 5271  | 12541 | 5355  | 34    |
| H4   | 881   | 14645 | 5932  | 48    |
| H5   | -469  | 16683 | 6134  | 61    |
| H6   | 452   | 18074 | 6251  | 60    |
| H7   | 2685  | 17475 | 6173  | 51    |
| H8   | 4063  | 15444 | 5976  | 41    |
| H10  | 3082  | 12267 | 7695  | 38    |
| H11  | 1821  | 13685 | 8482  | 55    |
| H12  | 2572  | 15199 | 8603  | 62    |
| H13  | 4574  | 15312 | 7957  | 57    |
| H14  | 5882  | 13885 | 7188  | 40    |
| H16  | 7494  | 12839 | 5573  | 60    |
| H17  | 9726  | 12290 | 5587  | 74    |
| H18  | 10719 | 10780 | 6615  | 62    |
| H19  | 9474  | 9880  | 7666  | 63    |
| H20  | 7267  | 10366 | 7642  | 53    |
| H2AA | 5114  | 5842  | 9152  | 32    |
| H2AB | 6116  | 5625  | 8386  | 32    |
| H4A  | 8075  | 4888  | 7888  | 59    |
| H5A  | 9893  | 3438  | 7319  | 84    |
| H6A  | 10956 | 1426  | 8052  | 79    |
| H7A  | 10260 | 859   | 9351  | 65    |
| H8A  | 8475  | 2309  | 9946  | 48    |
| H10A | 8471  | 7479  | 7756  | 37    |
| H11A | 10548 | 7233  | 7937  | 44    |
| H12A | 11046 | 6761  | 9171  | 40    |
| H13A | 9484  | 6466  | 10237 | 37    |
| H14A | 7411  | 6710  | 10067 | 30    |
| H16A | 4488  | 9931  | 8638  | 36    |
| H17A | 2972  | 11113 | 9490  | 44    |
| H18A | 2519  | 10096 | 10772 | 45    |
| H19A | 3612  | 7892  | 11219 | 38    |
| H20A | 5106  | 6694  | 10366 | 31    |
| H1WA | 3758  | 10040 | 5525  | 42    |
| H1WB | 3394  | 11040 | 5932  | 42    |

## B. Dy(NO<sub>3</sub>)<sub>3</sub>(4)<sub>2</sub>(H<sub>2</sub>O)

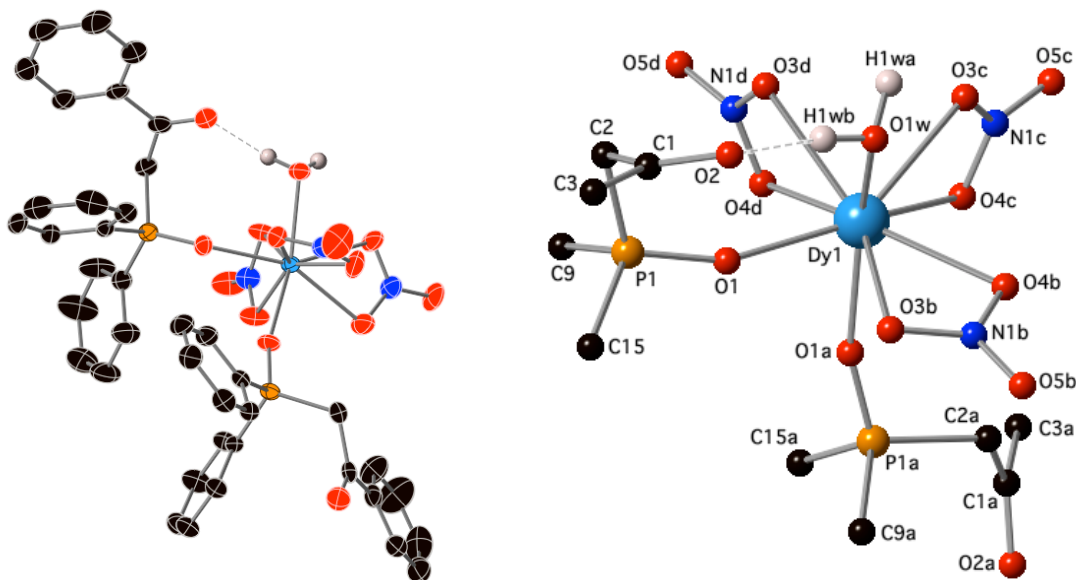

### Experimental

Single crystals of C<sub>40</sub>H<sub>36</sub>DyN<sub>3</sub>O<sub>14</sub>P<sub>2</sub> were grown at 4 °C by slow diffusion of hexane into a solution of the 1:3 Dy(NO<sub>3</sub>)<sub>3</sub>-4 complex in chloroform and used as received. A suitable crystal was selected and mounted using paratone oil on a nylon loop on a Bruker APEX-II CCD diffractometer. The crystal was kept at 173(2) K during data collection. Using Olex2 [1], the structure was solved with the ShelXS [2] structure solution program using Direct Methods and refined with the ShelXL [3] refinement package using Least Squares minimization.

1. Dolomanov, O.V., Bourhis, L.J., Gildea, R.J, Howard, J.A.K. & Puschmann, H. (2009), *J. Appl. Cryst.* 42, 339-341.
2. Sheldrick, G.M. (2008). *Acta Cryst.* A64, 112-122.
3. Sheldrick, G.M. (2015). *Acta Cryst.* C71, 3-8.

### Crystal structure determination of Dy(NO<sub>3</sub>)<sub>3</sub>(4)<sub>2</sub>(H<sub>2</sub>O)

**Crystal Data** for C<sub>40</sub>H<sub>36</sub>DyN<sub>3</sub>O<sub>14</sub>P<sub>2</sub> (*M* = 1007.16 g/mol): triclinic, space group P-1 (no. 2), *a* = 11.2313(7) Å, *b* = 11.6143(7) Å, *c* = 18.4094(11) Å, *α* = 72.0480(10)°, *β* = 75.8590(10)°, *γ* = 66.6400(10)°, *V* = 2076.6(2) Å<sup>3</sup>, *Z* = 2, *T* = 173.15 K, *μ*(MoKα) = 1.947 mm<sup>-1</sup>, *D*<sub>calc</sub> = 1.611 g/cm<sup>3</sup>, 29641 reflections measured (3.932° ≤ 2θ ≤ 51.42°), 7902 unique (*R*<sub>int</sub> = 0.0512, *R*<sub>sigma</sub> = 0.0508) which were used in all calculations. The final *R*<sub>1</sub> was 0.0321 (*I* > 2σ(*I*)) and *wR*<sub>2</sub> was 0.0702 (all data).

### Refinement model description

Number of restraints - 0, number of constraints - unknown.

Details:

1. Fixed Uiso

At 1.2 times of:

All C(H) groups, All C(H,H) groups

At 1.5 times of:

All O(H,H) groups

2.a Rotating group:

O1W(H1WA,H1WB)

2.b Secondary CH2 refined with riding coordinates:

C2(H2A,H2B), C2A(H2AA,H2AB)

2.c Aromatic/amide H refined with riding coordinates:

C4(H4), C5(H5), C6(H6), C7(H7), C8(H8), C10(H10), C11(H11), C12(H12),

C13(H13), C14(H14), C16(H16), C17(H17), C18(H18), C19(H19), C20(H20), C4A(H4A),

C5A(H5A), C6A(H6A), C7A(H7A), C8A(H8A), C10A(H10A), C11A(H11A), C12A(H12A),

C13A(H13A), C14A(H14A), C16A(H16A), C17A(H17A), C18A(H18A), C19A(H19A),

C20A(H20A)

**Table 1 Crystal data and structure refinement for Dy(NO<sub>3</sub>)<sub>3</sub>(4)<sub>2</sub>(H<sub>2</sub>O)**

|                                             |                                                                                 |
|---------------------------------------------|---------------------------------------------------------------------------------|
| Structure number                            | 8                                                                               |
| CCDC Number                                 | 1484660                                                                         |
| Empirical formula                           | C <sub>40</sub> H <sub>36</sub> DyN <sub>3</sub> O <sub>14</sub> P <sub>2</sub> |
| Formula weight                              | 1007.16                                                                         |
| Temperature/K                               | 173(2)                                                                          |
| Crystal system                              | triclinic                                                                       |
| Space group                                 | P-1                                                                             |
| a/Å                                         | 11.2313(7)                                                                      |
| b/Å                                         | 11.6143(7)                                                                      |
| c/Å                                         | 18.4094(11)                                                                     |
| α/°                                         | 72.0480(10)                                                                     |
| β/°                                         | 75.8590(10)                                                                     |
| γ/°                                         | 66.6400(10)                                                                     |
| Volume/Å <sup>3</sup>                       | 2076.6(2)                                                                       |
| Z                                           | 2                                                                               |
| ρ <sub>calc</sub> /cm <sup>3</sup>          | 1.611                                                                           |
| μ/mm <sup>-1</sup>                          | 1.947                                                                           |
| F(000)                                      | 1010.0                                                                          |
| Crystal size/mm <sup>3</sup>                | 0.245 × 0.151 × 0.086                                                           |
| Radiation                                   | MoKα (λ = 0.71073)                                                              |
| 2θ range for data collection/°              | 3.932 to 51.42                                                                  |
| Index ranges                                | -13 ≤ h ≤ 13, -14 ≤ k ≤ 14, -22 ≤ l ≤ 22                                        |
| Reflections collected                       | 29641                                                                           |
| Independent reflections                     | 7902 [R <sub>int</sub> = 0.0512, R <sub>sigma</sub> = 0.0508]                   |
| Data/restraints/parameters                  | 7902/0/542                                                                      |
| Goodness-of-fit on F <sup>2</sup>           | 1.017                                                                           |
| Final R indexes [I ≥ 2σ (I)]                | R <sub>1</sub> = 0.0321, wR <sub>2</sub> = 0.0656                               |
| Final R indexes [all data]                  | R <sub>1</sub> = 0.0435, wR <sub>2</sub> = 0.0702                               |
| Largest diff. peak/hole / e Å <sup>-3</sup> | 0.69/-0.39                                                                      |

Table 2 Fractional Atomic Coordinates (×10<sup>4</sup>) and Equivalent Isotropic Displacement Parameters (Å<sup>2</sup>×10<sup>3</sup>) for Dy(NO<sub>3</sub>)<sub>3</sub>(4)<sub>2</sub>(H<sub>2</sub>O). U<sub>eq</sub> is defined as 1/3 of the trace of the orthogonalised U<sub>ij</sub> tensor.

| Atom | x         | y          | z          | U(eq)    |
|------|-----------|------------|------------|----------|
| Dy1  | 5177.2(2) | 8885.7(2)  | 6775.1(2)  | 21.72(6) |
| P1   | 5440.7(9) | 11991.6(9) | 6671.7(5)  | 22.8(2)  |
| O1   | 5093(2)   | 10802(2)   | 6891.5(13) | 27.1(6)  |
| O2   | 2870(3)   | 12772(3)   | 5851.5(16) | 39.4(7)  |
| C1   | 3411(4)   | 13502(4)   | 5844.3(19) | 31.2(9)  |
| C2   | 4886(4)   | 13018(3)   | 5766.8(19) | 28.7(9)  |
| C3   | 2619(4)   | 14836(4)   | 5931.7(19) | 30.0(9)  |
| C4   | 1262(4)   | 15216(4)   | 5979(2)    | 41.6(10) |
| C5   | 470(5)    | 16418(4)   | 6096(3)    | 51.7(12) |
| C6   | 999(5)    | 17246(4)   | 6167(3)    | 53.3(13) |
| C7   | 2337(5)   | 16891(4)   | 6120(2)    | 46.7(11) |
| C8   | 3147(4)   | 15683(4)   | 6003(2)    | 35.3(10) |
| C9   | 7161(4)   | 11645(3)   | 6606(2)    | 28.7(9)  |
| C10  | 7900(4)   | 12214(5)   | 6000(2)    | 50.3(12) |
| C11  | 9218(4)   | 11886(5)   | 6006(3)    | 64.4(15) |
| C12  | 9812(4)   | 10999(5)   | 6615(3)    | 52.8(12) |

|      |           |           |             |          |
|------|-----------|-----------|-------------|----------|
| C13  | 9082(4)   | 10457(4)  | 7225(3)     | 56.5(13) |
| C14  | 7766(4)   | 10762(4)  | 7222(2)     | 46.9(11) |
| C15  | 4600(3)   | 12932(3)  | 7364.7(18)  | 23.4(8)  |
| C16  | 3392(4)   | 12876(4)  | 7757.2(19)  | 31.2(9)  |
| C17  | 2651(4)   | 13723(4)  | 8214(2)     | 47.4(12) |
| C18  | 3095(5)   | 14622(4)  | 8281(3)     | 54.2(14) |
| C19  | 4279(5)   | 14674(4)  | 7906(2)     | 47.6(12) |
| C20  | 5055(4)   | 13833(3)  | 7444(2)     | 34.6(9)  |
| P1A  | 6136.3(9) | 7361.4(9) | 8737.0(5)   | 22.4(2)  |
| O1A  | 5926(2)   | 8102(2)   | 7929.1(12)  | 28.6(6)  |
| O2A  | 6795(3)   | 4484(3)   | 10065.9(14) | 38.6(7)  |
| C1A  | 6979(4)   | 4648(3)   | 9367(2)     | 25.8(8)  |
| C2A  | 6009(4)   | 5792(3)   | 8898(2)     | 29.0(9)  |
| C3A  | 8109(4)   | 3754(4)   | 8972(2)     | 31.5(9)  |
| C4A  | 8517(5)   | 4072(4)   | 8190(3)     | 51.6(12) |
| C5A  | 9602(6)   | 3199(5)   | 7853(3)     | 74.2(17) |
| C6A  | 10235(5)  | 2004(5)   | 8296(4)     | 69.6(16) |
| C7A  | 9826(5)   | 1675(4)   | 9067(3)     | 58.8(14) |
| C8A  | 8757(4)   | 2545(4)   | 9410(3)     | 43.4(11) |
| C9A  | 4951(3)   | 8197(3)   | 9419.5(19)  | 23.8(8)  |
| C10A | 4675(3)   | 7600(3)   | 10188.8(19) | 27.2(8)  |
| C11A | 3787(4)   | 8311(4)   | 10691(2)    | 33.8(9)  |
| C12A | 3140(4)   | 9617(4)   | 10429(2)    | 38.8(10) |
| C13A | 3414(4)   | 10212(4)  | 9666(2)     | 38.7(10) |
| C14A | 4313(4)   | 9511(4)   | 9161(2)     | 32.3(9)  |
| C15A | 7730(3)   | 7132(3)   | 8891.7(19)  | 22.8(8)  |
| C16A | 8047(4)   | 6820(3)   | 9628(2)     | 28.1(9)  |
| C17A | 9275(4)   | 6682(4)   | 9724(2)     | 34.1(9)  |
| C18A | 10194(4)  | 6841(4)   | 9097(2)     | 34.3(9)  |
| C19A | 9907(4)   | 7123(4)   | 8363(2)     | 39.8(10) |
| C20A | 8677(4)   | 7264(4)   | 8256(2)     | 33.1(9)  |
| O3B  | 3164(2)   | 9713(2)   | 7636.9(13)  | 28.8(6)  |
| O4B  | 3623(3)   | 7816(3)   | 7485.8(17)  | 43.6(7)  |
| O5B  | 1900(3)   | 8625(3)   | 8265(2)     | 67.2(10) |
| N1B  | 2861(3)   | 8717(3)   | 7811.8(19)  | 35.8(8)  |
| O3C  | 5221(3)   | 7675(2)   | 5888.3(15)  | 42.3(7)  |
| O4C  | 6368(3)   | 6565(2)   | 6805.2(15)  | 42.7(7)  |
| O5C  | 6319(3)   | 5634(2)   | 5957.4(15)  | 45.3(8)  |
| N1C  | 5983(3)   | 6594(3)   | 6204.2(18)  | 33.9(8)  |
| O3D  | 6332(2)   | 9759(3)   | 5527.9(13)  | 36.2(7)  |
| O4D  | 7515(2)   | 8607(3)   | 6426.3(14)  | 37.9(7)  |
| O5D  | 8411(3)   | 9469(3)   | 5313.4(16)  | 51.1(8)  |
| N1D  | 7472(3)   | 9277(3)   | 5735.8(18)  | 33.5(8)  |
| O1W  | 3538(2)   | 10195(2)  | 5994.2(13)  | 28.5(6)  |

Table 3 Anisotropic Displacement Parameters ( $\text{\AA}^2 \times 10^3$ ) for  $\text{Dy}(\text{NO}_3)_3(4)_2(\text{H}_2\text{O})$ . The Anisotropic displacement factor exponent takes the form:  $-2\pi^2[h^2a^*U_{11}+2hka^*b^*U_{12}+\dots]$ .

| Atom | $U_{11}$  | $U_{22}$  | $U_{33}$ | $U_{23}$ | $U_{13}$ | $U_{12}$ |
|------|-----------|-----------|----------|----------|----------|----------|
| Dy1  | 24.94(11) | 20.41(10) | 18.38(9) | -6.59(6) | -6.59(7) | -2.87(7) |
| P1   | 25.6(5)   | 22.3(5)   | 19.3(4)  | -5.2(4)  | -3.7(4)  | -6.5(4)  |
| O1   | 31.6(15)  | 24.5(13)  | 26.6(13) | -9.3(11) | -4.1(11) | -8.9(11) |

|      |          |          |          |           |           |           |
|------|----------|----------|----------|-----------|-----------|-----------|
| O2   | 35.0(17) | 30.6(16) | 51.6(18) | -10.2(13) | -15.3(13) | -4.8(13)  |
| C1   | 34(2)    | 34(2)    | 19.7(18) | -3.8(16)  | -8.6(16)  | -5.8(19)  |
| C2   | 33(2)    | 27(2)    | 20.6(18) | -6.6(15)  | -3.8(16)  | -4.0(17)  |
| C3   | 31(2)    | 30(2)    | 20.1(18) | -0.2(15)  | -8.1(16)  | -3.5(18)  |
| C4   | 36(3)    | 37(2)    | 46(2)    | -9(2)     | -7(2)     | -6(2)     |
| C5   | 38(3)    | 43(3)    | 60(3)    | -16(2)    | -8(2)     | 5(2)      |
| C6   | 62(3)    | 36(3)    | 49(3)    | -16(2)    | -19(2)    | 8(2)      |
| C7   | 60(3)    | 37(3)    | 45(3)    | -12(2)    | -20(2)    | -9(2)     |
| C8   | 46(3)    | 32(2)    | 23.8(19) | -3.6(17)  | -9.4(18)  | -8(2)     |
| C9   | 30(2)    | 29(2)    | 27.1(19) | -8.5(16)  | -4.4(16)  | -7.9(17)  |
| C10  | 34(3)    | 70(3)    | 30(2)    | 6(2)      | -0.9(19)  | -15(2)    |
| C11  | 30(3)    | 106(4)   | 43(3)    | -2(3)     | 6(2)      | -28(3)    |
| C12  | 24(2)    | 69(3)    | 61(3)    | -19(3)    | -6(2)     | -9(2)     |
| C13  | 42(3)    | 52(3)    | 67(3)    | 11(2)     | -31(3)    | -13(2)    |
| C14  | 40(3)    | 49(3)    | 48(3)    | 9(2)      | -14(2)    | -21(2)    |
| C15  | 30(2)    | 19.9(19) | 19.2(17) | -2.7(14)  | -6.4(15)  | -7.5(16)  |
| C16  | 38(2)    | 32(2)    | 20.7(18) | -6.0(16)  | -2.6(17)  | -9.4(18)  |
| C17  | 38(3)    | 61(3)    | 29(2)    | -18(2)    | 2.3(19)   | -1(2)     |
| C18  | 68(4)    | 45(3)    | 40(3)    | -30(2)    | -22(2)    | 13(3)     |
| C19  | 75(4)    | 24(2)    | 49(3)    | -13(2)    | -37(3)    | -3(2)     |
| C20  | 47(3)    | 27(2)    | 34(2)    | -3.3(17)  | -17.4(19) | -12.5(19) |
| P1A  | 23.1(5)  | 25.1(5)  | 18.3(4)  | -4.9(4)   | -6.1(4)   | -5.8(4)   |
| O1A  | 30.5(15) | 33.2(15) | 19.0(12) | -5.0(11)  | -8.9(11)  | -5.5(12)  |
| O2A  | 46.2(18) | 40.3(17) | 30.2(15) | -6.9(12)  | -6.3(13)  | -16.5(14) |
| C1A  | 29(2)    | 22.1(19) | 33(2)    | -8.1(16)  | -6.1(17)  | -13.4(17) |
| C2A  | 31(2)    | 30(2)    | 31(2)    | -12.0(16) | -6.7(17)  | -10.3(18) |
| C3A  | 26(2)    | 27(2)    | 47(2)    | -15.9(18) | -4.2(18)  | -10.7(18) |
| C4A  | 55(3)    | 38(3)    | 54(3)    | -18(2)    | 7(2)      | -12(2)    |
| C5A  | 80(4)    | 59(4)    | 70(4)    | -32(3)    | 24(3)     | -17(3)    |
| C6A  | 41(3)    | 55(4)    | 116(5)   | -50(4)    | 6(3)      | -8(3)     |
| C7A  | 52(3)    | 35(3)    | 98(4)    | -28(3)    | -28(3)    | -5(2)     |
| C8A  | 44(3)    | 34(2)    | 60(3)    | -15(2)    | -20(2)    | -12(2)    |
| C9A  | 25(2)    | 28(2)    | 21.3(18) | -6.8(15)  | -5.7(15)  | -9.3(16)  |
| C10A | 27(2)    | 26(2)    | 28.5(19) | -6.3(16)  | -6.0(16)  | -8.2(17)  |
| C11A | 37(2)    | 43(2)    | 23.6(19) | -9.6(18)  | 2.2(17)   | -18(2)    |
| C12A | 36(3)    | 44(3)    | 38(2)    | -23(2)    | -1.3(19)  | -8(2)     |
| C13A | 41(3)    | 30(2)    | 40(2)    | -12.0(18) | -10.3(19) | -0.7(19)  |
| C14A | 37(2)    | 32(2)    | 25.5(19) | -6.9(17)  | -7.0(17)  | -8.1(19)  |
| C15A | 25(2)    | 20.8(19) | 22.8(18) | -3.5(14)  | -7.4(15)  | -6.8(16)  |
| C16A | 27(2)    | 34(2)    | 23.4(18) | -7.3(16)  | -2.3(16)  | -10.8(18) |
| C17A | 36(2)    | 41(2)    | 29(2)    | -7.3(18)  | -10.6(18) | -14(2)    |
| C18A | 27(2)    | 38(2)    | 42(2)    | -11.7(19) | -6.4(18)  | -12.5(19) |
| C19A | 28(2)    | 59(3)    | 30(2)    | -8(2)     | 1.9(17)   | -18(2)    |
| C20A | 32(2)    | 40(2)    | 27(2)    | -7.3(17)  | -7.4(17)  | -10.9(19) |
| O3B  | 27.8(15) | 28.0(14) | 29.4(13) | -7.6(11)  | -0.9(11)  | -9.9(12)  |
| O4B  | 45.0(19) | 26.2(15) | 62.4(19) | -13.5(14) | -4.5(15)  | -14.9(14) |
| O5B  | 41(2)    | 67(2)    | 85(3)    | -11.6(19) | 19.8(18)  | -32.4(18) |
| N1B  | 29(2)    | 36(2)    | 41(2)    | -0.9(16)  | -7.1(16)  | -15.1(17) |
| O3C  | 65(2)    | 22.4(15) | 38.2(15) | -11.8(12) | -24.3(14) | 0.1(14)   |
| O4C  | 54.2(19) | 31.1(16) | 41.0(16) | -13.2(13) | -20.5(14) | -1.3(14)  |
| O5C  | 69(2)    | 26.7(16) | 41.3(16) | -20.5(13) | -4.1(15)  | -10.2(15) |
| N1C  | 40(2)    | 30.0(19) | 31.0(18) | -11.6(15) | -2.3(15)  | -9.5(16)  |

|     |          |          |          |           |           |           |
|-----|----------|----------|----------|-----------|-----------|-----------|
| O3D | 25.2(15) | 54.6(18) | 22.8(13) | -8.1(12)  | -6.4(11)  | -6.7(13)  |
| O4D | 28.8(16) | 44.5(17) | 25.8(14) | -0.2(12)  | -5.1(11)  | -3.1(13)  |
| O5D | 29.9(17) | 70(2)    | 35.6(16) | -4.4(15)  | 7.8(14)   | -12.9(16) |
| N1D | 32(2)    | 35.7(19) | 27.6(18) | -14.2(15) | 0.3(16)   | -3.6(16)  |
| O1W | 31.2(15) | 26.1(14) | 25.5(13) | -8.0(11)  | -10.0(11) | -2.2(12)  |

Table 4 Bond Lengths for GVS414a.

| Atom | Atom | Length/Å | Atom | Atom | Length/Å |
|------|------|----------|------|------|----------|
| Dy1  | O1   | 2.264(2) | C19  | C20  | 1.384(6) |
| Dy1  | O1A  | 2.263(2) | P1A  | O1A  | 1.493(2) |
| Dy1  | O3B  | 2.453(2) | P1A  | C2A  | 1.812(4) |
| Dy1  | O4B  | 2.429(3) | P1A  | C9A  | 1.789(3) |
| Dy1  | N1B  | 2.863(3) | P1A  | C15A | 1.784(4) |
| Dy1  | O3C  | 2.443(2) | O2A  | C1A  | 1.219(4) |
| Dy1  | O4C  | 2.478(3) | C1A  | C2A  | 1.518(5) |
| Dy1  | N1C  | 2.891(3) | C1A  | C3A  | 1.478(5) |
| Dy1  | O3D  | 2.477(2) | C3A  | C4A  | 1.380(6) |
| Dy1  | O4D  | 2.458(3) | C3A  | C8A  | 1.390(5) |
| Dy1  | N1D  | 2.915(3) | C4A  | C5A  | 1.391(6) |
| Dy1  | O1W  | 2.344(2) | C5A  | C6A  | 1.379(7) |
| P1   | O1   | 1.494(2) | C6A  | C7A  | 1.363(7) |
| P1   | C2   | 1.810(3) | C7A  | C8A  | 1.385(6) |
| P1   | C9   | 1.791(4) | C9A  | C10A | 1.390(5) |
| P1   | C15  | 1.779(3) | C9A  | C14A | 1.386(5) |
| O2   | C1   | 1.219(4) | C10A | C11A | 1.378(5) |
| C1   | C2   | 1.509(5) | C11A | C12A | 1.382(5) |
| C1   | C3   | 1.486(5) | C12A | C13A | 1.379(5) |
| C3   | C4   | 1.396(5) | C13A | C14A | 1.380(5) |
| C3   | C8   | 1.385(5) | C15A | C16A | 1.388(5) |
| C4   | C5   | 1.376(6) | C15A | C20A | 1.390(5) |
| C5   | C6   | 1.366(6) | C16A | C17A | 1.373(5) |
| C6   | C7   | 1.379(6) | C17A | C18A | 1.368(5) |
| C7   | C8   | 1.386(5) | C18A | C19A | 1.375(5) |
| C9   | C10  | 1.378(5) | C19A | C20A | 1.382(5) |
| C9   | C14  | 1.380(5) | O3B  | N1B  | 1.260(4) |
| C10  | C11  | 1.377(6) | O4B  | N1B  | 1.270(4) |
| C11  | C12  | 1.368(6) | O5B  | N1B  | 1.212(4) |
| C12  | C13  | 1.362(6) | O3C  | N1C  | 1.260(4) |
| C13  | C14  | 1.378(6) | O4C  | N1C  | 1.270(4) |
| C15  | C16  | 1.389(5) | O5C  | N1C  | 1.219(4) |
| C15  | C20  | 1.390(5) | O3D  | N1D  | 1.280(4) |
| C16  | C17  | 1.373(5) | O4D  | N1D  | 1.271(4) |
| C17  | C18  | 1.370(6) | O5D  | N1D  | 1.202(4) |
| C18  | C19  | 1.355(7) |      |      |          |

Table 5 Bond Angles for Dy(NO<sub>3</sub>)<sub>3</sub>(4)<sub>2</sub>(H<sub>2</sub>O).

| Atom | Atom | Atom | Angle/°  | Atom | Atom | Atom | Angle/°  |
|------|------|------|----------|------|------|------|----------|
| O1   | Dy1  | O3B  | 72.62(8) | C5   | C4   | C3   | 119.9(4) |

|     |     |     |            |      |      |      |            |
|-----|-----|-----|------------|------|------|------|------------|
| O1  | Dy1 | O4B | 124.54(9)  | C6   | C5   | C4   | 120.6(4)   |
| O1  | Dy1 | N1B | 98.46(9)   | C5   | C6   | C7   | 120.4(4)   |
| O1  | Dy1 | O3C | 145.57(8)  | C6   | C7   | C8   | 119.7(4)   |
| O1  | Dy1 | O4C | 150.92(9)  | C3   | C8   | C7   | 120.3(4)   |
| O1  | Dy1 | N1C | 160.30(9)  | C10  | C9   | P1   | 124.8(3)   |
| O1  | Dy1 | O3D | 75.95(9)   | C10  | C9   | C14  | 118.6(4)   |
| O1  | Dy1 | O4D | 80.57(9)   | C14  | C9   | P1   | 116.6(3)   |
| O1  | Dy1 | N1D | 76.75(9)   | C11  | C10  | C9   | 120.4(4)   |
| O1  | Dy1 | O1W | 83.30(8)   | C12  | C11  | C10  | 120.6(4)   |
| O1A | Dy1 | O1  | 84.20(8)   | C13  | C12  | C11  | 119.4(4)   |
| O1A | Dy1 | O3B | 78.92(8)   | C12  | C13  | C14  | 120.6(4)   |
| O1A | Dy1 | O4B | 81.20(9)   | C13  | C14  | C9   | 120.4(4)   |
| O1A | Dy1 | N1B | 78.45(9)   | C16  | C15  | P1   | 119.0(3)   |
| O1A | Dy1 | O3C | 128.02(8)  | C16  | C15  | C20  | 119.8(3)   |
| O1A | Dy1 | O4C | 77.22(8)   | C20  | C15  | P1   | 120.7(3)   |
| O1A | Dy1 | N1C | 102.86(9)  | C17  | C16  | C15  | 119.6(4)   |
| O1A | Dy1 | O3D | 126.44(9)  | C18  | C17  | C16  | 120.4(4)   |
| O1A | Dy1 | O4D | 76.68(8)   | C19  | C18  | C17  | 120.4(4)   |
| O1A | Dy1 | N1D | 101.46(9)  | C18  | C19  | C20  | 120.8(4)   |
| O1A | Dy1 | O1W | 151.60(9)  | C19  | C20  | C15  | 119.0(4)   |
| O3B | Dy1 | N1B | 25.98(8)   | O1A  | P1A  | C2A  | 109.48(16) |
| O3B | Dy1 | O4C | 124.16(9)  | O1A  | P1A  | C9A  | 111.19(15) |
| O3B | Dy1 | N1C | 126.53(9)  | O1A  | P1A  | C15A | 109.97(15) |
| O3B | Dy1 | O3D | 136.80(8)  | C9A  | P1A  | C2A  | 109.03(17) |
| O3B | Dy1 | O4D | 145.22(9)  | C15A | P1A  | C2A  | 108.60(16) |
| O3B | Dy1 | N1D | 149.19(9)  | C15A | P1A  | C9A  | 108.53(16) |
| O4B | Dy1 | O3B | 52.14(9)   | P1A  | O1A  | Dy1  | 162.16(16) |
| O4B | Dy1 | N1B | 26.16(8)   | O2A  | C1A  | C2A  | 118.6(3)   |
| O4B | Dy1 | O3C | 77.90(10)  | O2A  | C1A  | C3A  | 121.6(3)   |
| O4B | Dy1 | O4C | 74.70(10)  | C3A  | C1A  | C2A  | 119.8(3)   |
| O4B | Dy1 | N1C | 75.03(9)   | C1A  | C2A  | P1A  | 117.1(3)   |
| O4B | Dy1 | O3D | 149.53(9)  | C4A  | C3A  | C1A  | 122.3(4)   |
| O4B | Dy1 | O4D | 144.49(9)  | C4A  | C3A  | C8A  | 119.5(4)   |
| O4B | Dy1 | N1D | 158.66(9)  | C8A  | C3A  | C1A  | 118.1(4)   |
| N1B | Dy1 | N1C | 100.97(10) | C3A  | C4A  | C5A  | 119.7(4)   |
| N1B | Dy1 | N1D | 175.17(9)  | C6A  | C5A  | C4A  | 119.9(5)   |
| O3C | Dy1 | O3B | 120.30(9)  | C7A  | C6A  | C5A  | 120.6(5)   |
| O3C | Dy1 | N1B | 99.78(10)  | C6A  | C7A  | C8A  | 119.9(5)   |
| O3C | Dy1 | O4C | 51.52(8)   | C7A  | C8A  | C3A  | 120.2(4)   |
| O3C | Dy1 | N1C | 25.60(8)   | C10A | C9A  | P1A  | 123.3(3)   |
| O3C | Dy1 | O3D | 74.45(9)   | C14A | C9A  | P1A  | 117.3(3)   |
| O3C | Dy1 | O4D | 94.31(9)   | C14A | C9A  | C10A | 119.4(3)   |
| O3C | Dy1 | N1D | 84.11(9)   | C11A | C10A | C9A  | 120.3(3)   |
| O4C | Dy1 | N1B | 99.48(10)  | C10A | C11A | C12A | 120.1(4)   |
| O4C | Dy1 | N1C | 25.92(8)   | C13A | C12A | C11A | 119.6(4)   |
| O4C | Dy1 | N1D | 85.17(9)   | C12A | C13A | C14A | 120.6(4)   |
| N1C | Dy1 | N1D | 83.79(9)   | C13A | C14A | C9A  | 119.9(4)   |
| O3D | Dy1 | N1B | 152.73(9)  | C16A | C15A | P1A  | 121.6(3)   |
| O3D | Dy1 | O4C | 97.32(9)   | C16A | C15A | C20A | 119.5(3)   |
| O3D | Dy1 | N1C | 85.22(9)   | C20A | C15A | P1A  | 118.9(3)   |
| O3D | Dy1 | N1D | 25.87(8)   | C17A | C16A | C15A | 119.9(3)   |
| O4D | Dy1 | N1B | 155.08(9)  | C18A | C17A | C16A | 120.4(4)   |



|     |     |     |            |      |      |      |           |
|-----|-----|-----|------------|------|------|------|-----------|
| O4D | Dy1 | O4C | 73.55(9)   | C17A | C18A | C19A | 120.5(4)  |
| O4D | Dy1 | N1C | 83.20(9)   | C18A | C19A | C20A | 120.0(4)  |
| O4D | Dy1 | O3D | 51.46(8)   | C19A | C20A | C15A | 119.7(3)  |
| O4D | Dy1 | N1D | 25.60(8)   | N1B  | O3B  | Dy1  | 95.5(2)   |
| O1W | Dy1 | O3B | 73.04(8)   | N1B  | O4B  | Dy1  | 96.3(2)   |
| O1W | Dy1 | O4B | 85.10(9)   | O3B  | N1B  | Dy1  | 58.52(17) |
| O1W | Dy1 | N1B | 78.31(9)   | O3B  | N1B  | O4B  | 116.0(3)  |
| O1W | Dy1 | O3C | 72.21(9)   | O4B  | N1B  | Dy1  | 57.50(18) |
| O1W | Dy1 | O4C | 122.73(9)  | O5B  | N1B  | Dy1  | 178.3(3)  |
| O1W | Dy1 | N1C | 97.39(9)   | O5B  | N1B  | O3B  | 121.9(4)  |
| O1W | Dy1 | O3D | 74.55(8)   | O5B  | N1B  | O4B  | 122.1(3)  |
| O1W | Dy1 | O4D | 125.87(8)  | N1C  | O3C  | Dy1  | 97.5(2)   |
| O1W | Dy1 | N1D | 100.33(9)  | N1C  | O4C  | Dy1  | 95.5(2)   |
| O1  | P1  | C2  | 110.91(16) | O3C  | N1C  | Dy1  | 56.90(17) |
| O1  | P1  | C9  | 112.87(16) | O3C  | N1C  | O4C  | 115.5(3)  |
| O1  | P1  | C15 | 109.74(15) | O4C  | N1C  | Dy1  | 58.57(17) |
| C9  | P1  | C2  | 109.37(17) | O5C  | N1C  | Dy1  | 179.5(3)  |
| C15 | P1  | C2  | 105.38(16) | O5C  | N1C  | O3C  | 122.6(3)  |
| C15 | P1  | C9  | 108.26(17) | O5C  | N1C  | O4C  | 122.0(3)  |
| P1  | O1  | Dy1 | 155.91(15) | N1D  | O3D  | Dy1  | 96.5(2)   |
| O2  | C1  | C2  | 119.0(3)   | N1D  | O4D  | Dy1  | 97.7(2)   |
| O2  | C1  | C3  | 120.1(4)   | O3D  | N1D  | Dy1  | 57.59(17) |
| C3  | C1  | C2  | 120.9(4)   | O4D  | N1D  | Dy1  | 56.69(18) |
| C1  | C2  | P1  | 110.6(2)   | O4D  | N1D  | O3D  | 114.3(3)  |
| C4  | C3  | C1  | 117.1(4)   | O5D  | N1D  | Dy1  | 178.2(3)  |
| C8  | C3  | C1  | 123.7(4)   | O5D  | N1D  | O3D  | 122.3(3)  |
| C8  | C3  | C4  | 119.2(4)   | O5D  | N1D  | O4D  | 123.4(3)  |

Table 6 Hydrogen Bonds for Dy(NO<sub>3</sub>)<sub>3</sub>(4)<sub>2</sub>(H<sub>2</sub>O).

| <b>D</b> | <b>H</b> | <b>A</b>         | <b>d(D-H)/Å</b> | <b>d(H-A)/Å</b> | <b>d(D-A)/Å</b> | <b>D-H-A/°</b> |
|----------|----------|------------------|-----------------|-----------------|-----------------|----------------|
| O1W      | H1WA     | O3D <sup>1</sup> | 0.87            | 1.94            | 2.755(3)        | 154.8          |
| O1W      | H1WB     | O2               | 0.87            | 1.87            | 2.725(4)        | 165.5          |

<sup>1</sup>i-X,2-Y,1-Z

Table 7 Torsion Angles for Dy(NO<sub>3</sub>)<sub>3</sub>(4)<sub>2</sub>(H<sub>2</sub>O).

| <b>A</b> | <b>B</b> | <b>C</b> | <b>D</b> | <b>Angle/°</b> | <b>A</b> | <b>B</b> | <b>C</b> | <b>D</b> | <b>Angle/°</b> |
|----------|----------|----------|----------|----------------|----------|----------|----------|----------|----------------|
| Dy1      | O3B      | N1B      | O4B      | -1.8(3)        | C15      | C16      | C17      | C18      | 0.3(6)         |
| Dy1      | O3B      | N1B      | O5B      | 178.1(3)       | C16      | C15      | C20      | C19      | -1.0(5)        |
| Dy1      | O4B      | N1B      | O3B      | 1.8(3)         | C16      | C17      | C18      | C19      | -1.0(6)        |
| Dy1      | O4B      | N1B      | O5B      | -178.0(3)      | C17      | C18      | C19      | C20      | 0.7(6)         |
| Dy1      | O3C      | N1C      | O4C      | 1.0(3)         | C18      | C19      | C20      | C15      | 0.3(6)         |
| Dy1      | O3C      | N1C      | O5C      | -179.8(3)      | C20      | C15      | C16      | C17      | 0.7(5)         |
| Dy1      | O4C      | N1C      | O3C      | -1.0(3)        | P1A      | C9A      | C10A     | C11A     | 177.5(3)       |
| Dy1      | O4C      | N1C      | O5C      | 179.8(3)       | P1A      | C9A      | C14A     | C13A     | -178.3(3)      |
| Dy1      | O3D      | N1D      | O4D      | 0.8(3)         | P1A      | C15A     | C16A     | C17A     | -178.4(3)      |
| Dy1      | O3D      | N1D      | O5D      | -177.9(3)      | P1A      | C15A     | C20A     | C19A     | 178.4(3)       |
| Dy1      | O4D      | N1D      | O3D      | -0.8(3)        | O1A      | P1A      | C2A      | C1A      | 139.8(3)       |
| Dy1      | O4D      | N1D      | O5D      | 177.9(3)       | O1A      | P1A      | C9A      | C10A     | 161.5(3)       |

|     |     |     |     |           |      |      |      |      |           |
|-----|-----|-----|-----|-----------|------|------|------|------|-----------|
| P1  | C9  | C10 | C11 | 179.6(4)  | O1A  | P1A  | C9A  | C14A | -20.3(3)  |
| P1  | C9  | C14 | C13 | -178.8(4) | O1A  | P1A  | C15A | C16A | 161.0(3)  |
| P1  | C15 | C16 | C17 | -171.1(3) | O1A  | P1A  | C15A | C20A | -19.4(3)  |
| P1  | C15 | C20 | C19 | 170.7(3)  | O2A  | C1A  | C2A  | P1A  | 77.8(4)   |
| O1  | P1  | C2  | C1  | 64.1(3)   | O2A  | C1A  | C3A  | C4A  | -164.1(4) |
| O1  | P1  | C9  | C10 | 132.0(4)  | O2A  | C1A  | C3A  | C8A  | 17.2(5)   |
| O1  | P1  | C9  | C14 | -49.4(4)  | C1A  | C3A  | C4A  | C5A  | 178.8(4)  |
| O1  | P1  | C15 | C16 | -29.6(3)  | C1A  | C3A  | C8A  | C7A  | -179.7(4) |
| O1  | P1  | C15 | C20 | 158.7(3)  | C2A  | P1A  | O1A  | Dy1  | 34.1(5)   |
| O2  | C1  | C2  | P1  | -76.5(4)  | C2A  | P1A  | C9A  | C10A | 40.7(3)   |
| O2  | C1  | C3  | C4  | -3.3(5)   | C2A  | P1A  | C9A  | C14A | -141.1(3) |
| O2  | C1  | C3  | C8  | 173.7(3)  | C2A  | P1A  | C15A | C16A | -79.2(3)  |
| C1  | C3  | C4  | C5  | 177.1(4)  | C2A  | P1A  | C15A | C20A | 100.4(3)  |
| C1  | C3  | C8  | C7  | -176.8(3) | C2A  | C1A  | C3A  | C4A  | 16.6(5)   |
| C2  | P1  | O1  | Dy1 | 66.1(4)   | C2A  | C1A  | C3A  | C8A  | -162.2(3) |
| C2  | P1  | C9  | C10 | 8.0(4)    | C3A  | C1A  | C2A  | P1A  | -102.9(3) |
| C2  | P1  | C9  | C14 | -173.4(3) | C3A  | C4A  | C5A  | C6A  | 2.4(8)    |
| C2  | P1  | C15 | C16 | 89.9(3)   | C4A  | C3A  | C8A  | C7A  | 1.5(6)    |
| C2  | P1  | C15 | C20 | -81.9(3)  | C4A  | C5A  | C6A  | C7A  | -1.5(9)   |
| C2  | C1  | C3  | C4  | 178.4(3)  | C5A  | C6A  | C7A  | C8A  | 0.6(8)    |
| C2  | C1  | C3  | C8  | -4.7(5)   | C6A  | C7A  | C8A  | C3A  | -0.6(7)   |
| C3  | C1  | C2  | P1  | 101.9(3)  | C8A  | C3A  | C4A  | C5A  | -2.4(7)   |
| C3  | C4  | C5  | C6  | -0.2(6)   | C9A  | P1A  | O1A  | Dy1  | -86.4(5)  |
| C4  | C3  | C8  | C7  | 0.0(5)    | C9A  | P1A  | C2A  | C1A  | -98.4(3)  |
| C4  | C5  | C6  | C7  | 0.3(7)    | C9A  | P1A  | C15A | C16A | 39.2(3)   |
| C5  | C6  | C7  | C8  | -0.3(7)   | C9A  | P1A  | C15A | C20A | -141.2(3) |
| C6  | C7  | C8  | C3  | 0.1(6)    | C9A  | C10A | C11A | C12A | 1.6(6)    |
| C8  | C3  | C4  | C5  | 0.0(6)    | C10A | C9A  | C14A | C13A | 0.0(6)    |
| C9  | P1  | O1  | Dy1 | -57.1(4)  | C10A | C11A | C12A | C13A | -1.7(6)   |
| C9  | P1  | C2  | C1  | -170.8(3) | C11A | C12A | C13A | C14A | 1.0(6)    |
| C9  | P1  | C15 | C16 | -153.1(3) | C12A | C13A | C14A | C9A  | -0.1(6)   |
| C9  | P1  | C15 | C20 | 35.1(3)   | C14A | C9A  | C10A | C11A | -0.8(5)   |
| C9  | C10 | C11 | C12 | -0.4(8)   | C15A | P1A  | O1A  | Dy1  | 153.4(5)  |
| C10 | C9  | C14 | C13 | -0.2(7)   | C15A | P1A  | C2A  | C1A  | 19.7(3)   |
| C10 | C11 | C12 | C13 | -1.3(8)   | C15A | P1A  | C9A  | C10A | -77.4(3)  |
| C11 | C12 | C13 | C14 | 2.2(8)    | C15A | P1A  | C9A  | C14A | 100.8(3)  |
| C12 | C13 | C14 | C9  | -1.5(8)   | C15A | C16A | C17A | C18A | -0.5(6)   |
| C14 | C9  | C10 | C11 | 1.1(7)    | C16A | C15A | C20A | C19A | -2.0(6)   |
| C15 | P1  | O1  | Dy1 | -177.9(3) | C16A | C17A | C18A | C19A | -0.9(6)   |
| C15 | P1  | C2  | C1  | -54.6(3)  | C17A | C18A | C19A | C20A | 0.9(6)    |
| C15 | P1  | C9  | C10 | -106.3(4) | C18A | C19A | C20A | C15A | 0.6(6)    |
| C15 | P1  | C9  | C14 | 72.3(3)   | C20A | C15A | C16A | C17A | 2.0(5)    |

Table 8 Hydrogen Atom Coordinates ( $\text{\AA}\times 10^4$ ) and Isotropic Displacement Parameters ( $\text{\AA}^2\times 10^3$ ) for  $\text{Dy}(\text{NO}_3)_3(4)_2(\text{H}_2\text{O})$ .

| Atom | x    | y     | z    | U(eq) |
|------|------|-------|------|-------|
| H2A  | 5193 | 13760 | 5610 | 34    |
| H2B  | 5265 | 12525 | 5361 | 34    |
| H4   | 886  | 14644 | 5931 | 50    |
| H5   | -452 | 16674 | 6126 | 62    |
| H6   | 442  | 18072 | 6250 | 64    |

|      |       |       |       |    |
|------|-------|-------|-------|----|
| H7   | 2701  | 17471 | 6168  | 56 |
| H8   | 4069  | 15436 | 5971  | 42 |
| H10  | 7497  | 12835 | 5575  | 60 |
| H11  | 9720  | 12280 | 5584  | 77 |
| H12  | 10726 | 10763 | 6612  | 63 |
| H13  | 9484  | 9862  | 7657  | 68 |
| H14  | 7271  | 10362 | 7646  | 56 |
| H16  | 3080  | 12256 | 7710  | 37 |
| H17  | 1826  | 13685 | 8485  | 57 |
| H18  | 2570  | 15213 | 8591  | 65 |
| H19  | 4580  | 15296 | 7962  | 57 |
| H20  | 5886  | 13870 | 7185  | 42 |
| H2AA | 5114  | 5839  | 9159  | 35 |
| H2AB | 6105  | 5620  | 8388  | 35 |
| H4A  | 8058  | 4883  | 7883  | 62 |
| H5A  | 9907  | 3427  | 7319  | 89 |
| H6A  | 10963 | 1403  | 8062  | 83 |
| H7A  | 10272 | 852   | 9369  | 71 |
| H8A  | 8467  | 2313  | 9947  | 52 |
| H10A | 5101  | 6698  | 10369 | 33 |
| H11A | 3620  | 7902  | 11219 | 41 |
| H12A | 2511  | 10103 | 10772 | 47 |
| H13A | 2980  | 11113 | 9487  | 46 |
| H14A | 4494  | 9928  | 8636  | 39 |
| H16A | 7414  | 6701  | 10066 | 34 |
| H17A | 9488  | 6475  | 10228 | 41 |
| H18A | 11037 | 6757  | 9168  | 41 |
| H19A | 10554 | 7220  | 7931  | 48 |
| H20A | 8478  | 7451  | 7750  | 40 |
| H1WA | 3747  | 9974  | 5557  | 43 |
| H1WB | 3464  | 10998 | 5911  | 43 |

## C. $\text{Gd}(\text{NO}_3)_3(4)_2(\text{H}_2\text{O})$

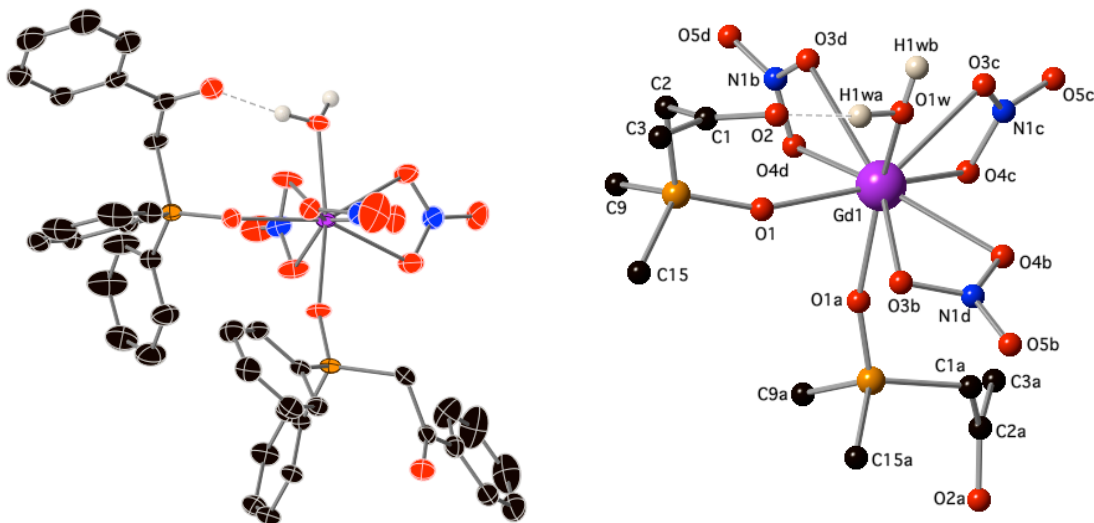

### Experimental

Single crystals of  $\text{C}_{40}\text{H}_{36}\text{GdN}_3\text{O}_{14}\text{P}_2$  were grown by slow solvent evaporation of a 1:3  $\text{Gd}(\text{NO}_3)_3$ -4 complex in 2:5:5 diethyl ether/pentane/ethanol and used as received. A suitable crystal was selected and mounted using a small amount of paratone oil on a nylon loop on a Bruker APEX-II CCD diffractometer. The crystal was kept at 173(2) K during data collection. Using Olex2 [1], the structure was solved with the ShelXS [2] structure solution program using Direct Methods and refined with the ShelXL [3] refinement package using Least Squares minimisation.

1. Dolomanov, O.V., Bourhis, L.J., Gildea, R.J., Howard, J.A.K. & Puschmann, H. (2009), *J. Appl. Cryst.* 42, 339-341.
2. Sheldrick, G.M. (2008). *Acta Cryst.* A64, 112-122.
3. Sheldrick, G.M. (2015). *Acta Cryst.* C71, 3-8.

### Crystal structure determination of $\text{Gd}(\text{NO}_3)_3(4)_2(\text{H}_2\text{O})$

**Crystal Data** for  $\text{C}_{40}\text{H}_{36}\text{GdN}_3\text{O}_{14}\text{P}_2$  ( $M=1001.91$  g/mol): triclinic, space group P-1 (no. 2),  $a = 11.23800(10)$  Å,  $b = 11.6353(2)$  Å,  $c = 18.4819(2)$  Å,  $\alpha = 72.0301(6)^\circ$ ,  $\beta = 75.7452(6)^\circ$ ,  $\gamma = 66.7376(6)^\circ$ ,  $V = 2090.38(5)$  Å<sup>3</sup>,  $Z = 2$ ,  $T = 173.01$  K,  $\mu(\text{CuK}\alpha) = 11.592$  mm<sup>-1</sup>,  $D_{\text{calc}} = 1.592$  g/cm<sup>3</sup>, 30211 reflections measured ( $5.078^\circ \leq 2\theta \leq 144.48^\circ$ ), 7956 unique ( $R_{\text{int}} = 0.0389$ ,  $R_{\text{sigma}} = 0.0359$ ) which were used in all calculations. The final  $R_1$  was 0.0242 ( $I > 2\sigma(I)$ ) and  $wR_2$  was 0.0613 (all data).

### Refinement model description

Number of restraints - 0, number of constraints - unknown.

Details:

1. Fixed Uiso

At 1.2 times of:

All C(H) groups, All C(H,H) groups

At 1.5 times of:

All O(H) groups

2.a Rotating group:

O1W(H1WA)

2.b Secondary CH2 refined with riding coordinates:

C2(H2A,H2B), C1A(H1AA,H1AB)

2.c Aromatic/amide H refined with riding coordinates:

C4(H4), C5(H5), C6(H6), C7(H7), C8(H8), C10(H10), C11(H11), C12(H12),

C13(H13), C14(H14), C16(H16), C17(H17), C18(H18), C19(H19), C20(H20), C4A(H4A),

C5A(H5A), C6A(H6A), C7A(H7A), C8A(H8A), C10A(H10A), C11A(H11A), C12A(H12A),

C13A(H13A), C14A(H14A), C16A(H16A), C17A(H17A), C18A(H18A), C19A(H19A),

C20A(H20A)

Table 1 Crystal data and structure refinement for Gd(NO<sub>3</sub>)<sub>3</sub>(4)<sub>2</sub>(H<sub>2</sub>O)

|                                             |                                                                                 |
|---------------------------------------------|---------------------------------------------------------------------------------|
| Structure number                            | <b>6</b>                                                                        |
| CCDC number                                 | 1484664                                                                         |
| Empirical formula                           | C <sub>40</sub> H <sub>36</sub> GdN <sub>3</sub> O <sub>14</sub> P <sub>2</sub> |
| Formula weight                              | 1001.91                                                                         |
| Temperature/K                               | 173(2)                                                                          |
| Crystal system                              | triclinic                                                                       |
| Space group                                 | P-1                                                                             |
| a/Å                                         | 11.23800(10)                                                                    |
| b/Å                                         | 11.6353(2)                                                                      |
| c/Å                                         | 18.4819(2)                                                                      |
| α/°                                         | 72.0301(6)                                                                      |
| β/°                                         | 75.7452(6)                                                                      |
| γ/°                                         | 66.7376(6)                                                                      |
| Volume/Å <sup>3</sup>                       | 2090.38(5)                                                                      |
| Z                                           | 2                                                                               |
| ρ <sub>calc</sub> /g/cm <sup>3</sup>        | 1.592                                                                           |
| μ/mm <sup>-1</sup>                          | 11.592                                                                          |
| F(000)                                      | 1006.0                                                                          |
| Crystal size/mm <sup>3</sup>                | 0.36 × 0.091 × 0.042                                                            |
| Radiation                                   | CuKα (λ = 1.54178)                                                              |
| 2Θ range for data collection/°              | 5.078 to 144.48                                                                 |
| Index ranges                                | -12 ≤ h ≤ 13, -14 ≤ k ≤ 14, -22 ≤ l ≤ 22                                        |
| Reflections collected                       | 30211                                                                           |
| Independent reflections                     | 7956 [R <sub>int</sub> = 0.0389, R <sub>sigma</sub> = 0.0359]                   |
| Data/restraints/parameters                  | 7956/0/546                                                                      |
| Goodness-of-fit on F <sup>2</sup>           | 1.035                                                                           |
| Final R indexes [I ≥ 2σ (I)]                | R <sub>1</sub> = 0.0242, wR <sub>2</sub> = 0.0603                               |
| Final R indexes [all data]                  | R <sub>1</sub> = 0.0257, wR <sub>2</sub> = 0.0612                               |
| Largest diff. peak/hole / e Å <sup>-3</sup> | 0.67/-0.43                                                                      |

Table 2 Fractional Atomic Coordinates (×10<sup>4</sup>) and Equivalent Isotropic Displacement Parameters (Å<sup>2</sup>×10<sup>3</sup>) for Gd(NO<sub>3</sub>)<sub>3</sub>(4)<sub>2</sub>(H<sub>2</sub>O). U<sub>eq</sub> is defined as 1/3 of the trace of the orthogonalised U<sub>ij</sub> tensor.

| Atom | x           | y          | z          | U(eq)     |
|------|-------------|------------|------------|-----------|
| Gd1  | 9825.1(2)   | 6111.8(2)  | 3224.6(2)  | 17.92(5)  |
| P1   | 9552.9(5)   | 2984.1(5)  | 3330.7(3)  | 19.20(11) |
| O1   | 9903.5(15)  | 4174.8(15) | 3113.1(9)  | 24.9(3)   |
| O2   | 12115.9(17) | 2211.1(17) | 4154.8(11) | 36.4(4)   |
| C1   | 11578(2)    | 1481(2)    | 4159.2(13) | 26.6(5)   |
| C2   | 10099(2)    | 1952(2)    | 4236.8(12) | 25.2(5)   |
| C3   | 12385(2)    | 153(2)     | 4065.2(13) | 27.2(5)   |
| C4   | 13739(3)    | -221(3)    | 4015.7(16) | 37.1(6)   |
| C5   | 14541(3)    | -1417(3)   | 3898.5(19) | 47.6(7)   |
| C6   | 14015(3)    | -2259(3)   | 3826.8(18) | 48.0(8)   |
| C7   | 12677(3)    | -1902(3)   | 3873.8(17) | 42.2(7)   |
| C8   | 11861(3)    | -698(2)    | 3993.4(14) | 31.3(5)   |
| C9   | 7835(2)     | 3328(2)    | 3395.7(14) | 26.1(5)   |

|      |             |             |            |           |
|------|-------------|-------------|------------|-----------|
| C10  | 7094(3)     | 2757(3)     | 4003.0(16) | 46.2(8)   |
| C11  | 5772(3)     | 3087(4)     | 4000(2)    | 57.1(9)   |
| C12  | 5183(3)     | 3967(3)     | 3390(2)    | 47.6(7)   |
| C13  | 5917(3)     | 4531(3)     | 2772(2)    | 51.8(8)   |
| C14  | 7233(3)     | 4216(3)     | 2778.7(17) | 42.5(7)   |
| C15  | 10401(2)    | 2044(2)     | 2635.9(12) | 22.1(4)   |
| C16  | 9942(3)     | 1139(2)     | 2555.4(15) | 31.1(5)   |
| C17  | 10714(3)    | 306(3)      | 2090.9(18) | 45.7(8)   |
| C18  | 11911(3)    | 372(3)      | 1715.6(18) | 52.3(9)   |
| C19  | 12356(3)    | 1272(3)     | 1785.5(16) | 46.5(7)   |
| C20  | 11608(2)    | 2115(2)     | 2247.4(14) | 30.2(5)   |
| P1A  | 8861.1(5)   | 7641.2(5)   | 1253.5(3)  | 18.89(11) |
| O1A  | 9066.9(15)  | 6895.5(16)  | 2064.3(9)  | 26.5(3)   |
| O2A  | 8198.7(18)  | 10525.6(18) | -70.7(10)  | 33.6(4)   |
| C1A  | 8987(2)     | 9212(2)     | 1098.8(14) | 25.7(5)   |
| C2A  | 8020(2)     | 10352(2)    | 625.2(13)  | 24.2(5)   |
| C3A  | 6897(2)     | 11244(2)    | 1028.1(15) | 28.6(5)   |
| C4A  | 6472(3)     | 10911(3)    | 1810.6(19) | 47.9(7)   |
| C5A  | 5398(4)     | 11785(4)    | 2146(3)    | 68.6(11)  |
| C6A  | 4758(3)     | 12977(3)    | 1721(3)    | 63.7(11)  |
| C7A  | 5184(3)     | 13317(3)    | 944(2)     | 52.3(8)   |
| C8A  | 6240(3)     | 12462(3)    | 590.9(18)  | 38.7(6)   |
| C9A  | 7262(2)     | 7868(2)     | 1097.8(13) | 21.1(4)   |
| C10A | 6322(2)     | 7715(2)     | 1735.8(14) | 29.5(5)   |
| C11A | 5086(2)     | 7862(3)     | 1630.5(15) | 34.7(6)   |
| C12A | 4790(2)     | 8152(3)     | 896.8(15)  | 31.3(5)   |
| C13A | 5715(2)     | 8328(2)     | 262.8(14)  | 28.7(5)   |
| C14A | 6952(2)     | 8182(2)     | 360.7(13)  | 24.3(5)   |
| C15A | 10051(2)    | 6802(2)     | 573.2(12)  | 20.7(4)   |
| C16A | 10696(2)    | 5483(2)     | 832.9(14)  | 28.6(5)   |
| C17A | 11591(3)    | 4787(3)     | 327.9(16)  | 35.8(6)   |
| C18A | 11857(3)    | 5386(3)     | -436.2(16) | 36.2(6)   |
| C19A | 11224(2)    | 6696(3)     | -701.3(14) | 31.7(5)   |
| C20A | 10322(2)    | 7415(2)     | -201.1(13) | 25.3(5)   |
| O3B  | 11855.3(15) | 5267.8(15)  | 2355.5(10) | 27.3(3)   |
| O4B  | 11414.2(18) | 7170.3(18)  | 2492.6(12) | 40.1(4)   |
| O5B  | 13123(2)    | 6342(3)     | 1703.5(17) | 66.2(7)   |
| N1B  | 12166(2)    | 6261(2)     | 2168.1(13) | 33.3(5)   |
| O3C  | 9792(2)     | 7352.8(17)  | 4111.8(11) | 40.0(5)   |
| O4C  | 8622(2)     | 8449.3(18)  | 3204.2(11) | 39.4(4)   |
| O5C  | 8680(2)     | 9378.6(18)  | 4049.9(11) | 41.5(5)   |
| N1C  | 9013(2)     | 8429(2)     | 3797.8(12) | 30.6(4)   |
| O3D  | 8641.3(16)  | 5241.8(19)  | 4477.0(9)  | 34.1(4)   |
| O4D  | 7461.9(16)  | 6371.0(18)  | 3573.9(10) | 35.1(4)   |
| O5D  | 6569.2(18)  | 5507(2)     | 4682.2(12) | 48.1(5)   |
| N1D  | 7507(2)     | 5708(2)     | 4258.0(12) | 29.4(4)   |
| O1W  | 11476.7(16) | 4783.2(16)  | 4013.4(10) | 25.6(3)   |

Table 3 Anisotropic Displacement Parameters ( $\text{\AA}^2 \times 10^3$ ) for  $\text{Gd}(\text{NO}_3)_3(4)_2(\text{H}_2\text{O})$ . The Anisotropic displacement factor exponent takes the form:  $-2\pi^2[h^2a^*U_{11}+2hka^*b^*U_{12}+\dots]$ .

| Atom | $U_{11}$ | $U_{22}$ | $U_{33}$ | $U_{23}$ | $U_{13}$ | $U_{12}$ |
|------|----------|----------|----------|----------|----------|----------|
|------|----------|----------|----------|----------|----------|----------|

|      |          |          |          |           |           |           |
|------|----------|----------|----------|-----------|-----------|-----------|
| Gd1  | 17.99(7) | 19.74(7) | 13.67(7) | -5.42(4)  | -4.54(4)  | -1.66(4)  |
| P1   | 18.9(3)  | 22.1(3)  | 14.1(2)  | -4.59(19) | -1.96(19) | -4.51(19) |
| O1   | 27.6(8)  | 23.4(8)  | 24.3(8)  | -7.8(6)   | -3.9(6)   | -7.6(6)   |
| O2   | 29.6(9)  | 30.2(9)  | 47.7(11) | -10.7(8)  | -14.5(8)  | -2.3(7)   |
| C1   | 26.4(12) | 28.4(12) | 18.9(11) | -3.0(9)   | -5.7(9)   | -3.6(9)   |
| C2   | 23.0(11) | 29.4(12) | 15(1)    | -3.6(9)   | -2.1(8)   | -2.3(9)   |
| C3   | 27.1(12) | 27.1(12) | 18.8(11) | -1.5(9)   | -5.9(9)   | -2.1(9)   |
| C4   | 27.3(13) | 35.0(14) | 41.6(15) | -9.0(11)  | -6.0(11)  | -2.5(10)  |
| C5   | 28.3(14) | 44.2(17) | 55.3(19) | -14.9(14) | -6.9(13)  | 5.7(11)   |
| C6   | 51.8(19) | 32.7(15) | 45.7(17) | -16.7(12) | -15.6(14) | 10.3(12)  |
| C7   | 55.1(18) | 33.5(14) | 38.2(15) | -9.3(11)  | -19.0(13) | -7.8(12)  |
| C8   | 34.1(13) | 30.4(12) | 24.2(12) | -3.7(10)  | -8.8(10)  | -5(1)     |
| C9   | 23.3(11) | 28.7(12) | 23.6(11) | -8.1(9)   | -2.0(9)   | -5.6(9)   |
| C10  | 25.2(13) | 71(2)    | 26.4(14) | 2.0(13)   | -1.5(10)  | -12.0(12) |
| C11  | 26.6(15) | 91(3)    | 41.2(17) | -2.8(16)  | 3.6(12)   | -21.6(15) |
| C12  | 20.8(13) | 61.9(19) | 55.8(19) | -15.0(15) | -7.5(12)  | -7.7(12)  |
| C13  | 35.8(16) | 54.2(19) | 59(2)    | 7.1(15)   | -24.1(15) | -13.7(13) |
| C14  | 32.9(14) | 48.7(17) | 40.2(16) | 10.2(13)  | -14.9(12) | -18.0(12) |
| C15  | 27.2(11) | 21.4(11) | 14.3(10) | -2.8(8)   | -4.7(8)   | -4.9(8)   |
| C16  | 41.7(14) | 24.5(12) | 29.3(13) | -4.3(9)   | -15.6(10) | -9(1)     |
| C17  | 67(2)    | 28.6(13) | 46.7(17) | -15.5(12) | -35.1(15) | -0.6(12)  |
| C18  | 56(2)    | 47.3(17) | 43.5(17) | -32.5(14) | -22.8(15) | 18.5(14)  |
| C19  | 37.6(15) | 62.3(19) | 24.4(13) | -19.2(13) | 2.3(11)   | 1.1(13)   |
| C20  | 28.1(12) | 35.9(13) | 22.6(12) | -10.2(10) | 0.0(9)    | -6.8(10)  |
| PIA  | 16.9(2)  | 24.3(3)  | 13.7(2)  | -4.28(19) | -4.42(18) | -4.11(19) |
| O1A  | 24.5(8)  | 34.1(9)  | 15.4(8)  | -3.7(6)   | -7.0(6)   | -3.6(6)   |
| O2A  | 35.5(9)  | 38.5(10) | 26.4(9)  | -6.8(7)   | -5.9(7)   | -12.1(7)  |
| C1A  | 22.9(11) | 30.4(12) | 27.0(12) | -11.1(9)  | -5.6(9)   | -8.2(9)   |
| C2A  | 24.7(11) | 25.6(11) | 25.7(12) | -6.3(9)   | -4.2(9)   | -11.9(9)  |
| C3A  | 23.6(11) | 27.6(12) | 37.5(14) | -11.4(10) | -4.4(10)  | -9.0(9)   |
| C4A  | 51.9(18) | 37.7(16) | 43.1(17) | -13.0(13) | 9.4(13)   | -11.1(13) |
| C5A  | 65(2)    | 61(2)    | 68(3)    | -32.3(19) | 29.6(19)  | -20.2(18) |
| C6A  | 37.8(17) | 49(2)    | 105(3)   | -48(2)    | 8.7(18)   | -4.9(14)  |
| C7A  | 35.1(15) | 33.0(15) | 91(3)    | -23.1(16) | -22.6(16) | 0.9(11)   |
| C8A  | 35.5(14) | 32.8(14) | 51.7(17) | -12.7(12) | -17.4(12) | -7.1(11)  |
| C9A  | 20(1)    | 21.7(10) | 19.9(11) | -4.9(8)   | -3.9(8)   | -5.1(8)   |
| C10A | 24.8(12) | 40.4(14) | 20.2(11) | -4.7(10)  | -2.5(9)   | -10.4(10) |
| C11A | 22.3(12) | 51.1(16) | 28.6(13) | -9.3(11)  | 2(1)      | -14.0(11) |
| C12A | 18.8(11) | 40.4(14) | 35.6(14) | -11.5(11) | -4.8(9)   | -8.8(9)   |
| C13A | 25.9(12) | 36.8(13) | 24.3(12) | -8(1)     | -7.5(9)   | -9(1)     |
| C14A | 21.9(11) | 32.6(12) | 19.2(11) | -6.5(9)   | -3.2(8)   | -9.9(9)   |
| C15A | 18.2(10) | 27.2(11) | 16.8(10) | -7.2(8)   | -3.2(8)   | -5.9(8)   |
| C16A | 29.6(12) | 30.3(12) | 22.5(11) | -5.4(9)   | -7.2(9)   | -5.5(9)   |
| C17A | 35.5(14) | 30.7(13) | 34.0(14) | -11.2(11) | -7.2(11)  | 0.1(10)   |
| C18A | 30.9(13) | 43.6(15) | 33.9(14) | -23.0(12) | 0.9(10)   | -5.5(11)  |
| C19A | 31.0(13) | 42.7(14) | 23.6(12) | -11.2(10) | -0.2(9)   | -14.6(10) |
| C20A | 24.8(11) | 29.9(12) | 21.2(11) | -5.1(9)   | -3.2(9)   | -10.0(9)  |
| O3B  | 24.1(8)  | 27.6(8)  | 28.2(9)  | -7.1(7)   | -0.8(6)   | -8.2(6)   |
| O4B  | 37.1(10) | 30.3(9)  | 53.5(12) | -12.2(9)  | -1.6(9)   | -13.5(8)  |
| O5B  | 39.0(12) | 66.4(16) | 83.5(19) | -15.2(14) | 24.2(12)  | -29.8(11) |
| N1B  | 23.4(10) | 34.9(12) | 38.0(12) | -4.3(9)   | -1.1(9)   | -11.7(8)  |
| O3C  | 56.9(12) | 28.2(9)  | 31.5(10) | -10.8(7)  | -21.8(9)  | 0.6(8)    |

|     |          |          |          |          |          |          |
|-----|----------|----------|----------|----------|----------|----------|
| O4C | 46.4(11) | 31.7(9)  | 35.9(10) | -14.4(8) | -18.2(8) | 2.8(8)   |
| O5C | 57.9(12) | 28.3(9)  | 37.6(11) | -18.5(8) | -0.4(9)  | -9.7(8)  |
| N1C | 36.6(11) | 27.5(10) | 26.1(11) | -11.9(8) | -2.0(8)  | -6.9(8)  |
| O3D | 24.6(9)  | 54.8(11) | 17.9(8)  | -7.1(7)  | -4.8(6)  | -8.7(8)  |
| O4D | 21.9(8)  | 43.5(10) | 25.1(9)  | -2.6(7)  | -3.8(7)  | 0.1(7)   |
| O5D | 26.3(10) | 67.2(14) | 36.1(11) | -6.7(10) | 8.0(8)   | -12.5(9) |
| N1D | 23.9(10) | 33.5(11) | 22.2(10) | -10.8(8) | 1.6(8)   | -0.9(8)  |
| O1W | 25.8(8)  | 27.9(8)  | 20.4(8)  | -7.5(6)  | -9.7(6)  | -1.6(6)  |

Table 4 Bond Lengths for Gd(NO<sub>3</sub>)<sub>3</sub>(4)<sub>2</sub>(H<sub>2</sub>O).

| Atom | Atom | Length/Å   | Atom | Atom | Length/Å   |
|------|------|------------|------|------|------------|
| Gd1  | O1   | 2.2914(16) | C19  | C20  | 1.382(4)   |
| Gd1  | O1A  | 2.2882(15) | P1A  | O1A  | 1.5041(15) |
| Gd1  | O3B  | 2.4797(16) | P1A  | C1A  | 1.818(2)   |
| Gd1  | O4B  | 2.4608(19) | P1A  | C9A  | 1.794(2)   |
| Gd1  | N1B  | 2.896(2)   | P1A  | C15A | 1.794(2)   |
| Gd1  | O3C  | 2.4827(18) | O2A  | C2A  | 1.217(3)   |
| Gd1  | O4C  | 2.5068(18) | C1A  | C2A  | 1.523(3)   |
| Gd1  | N1C  | 2.927(2)   | C2A  | C3A  | 1.485(3)   |
| Gd1  | O3D  | 2.5007(17) | C3A  | C4A  | 1.389(4)   |
| Gd1  | O4D  | 2.4908(17) | C3A  | C8A  | 1.402(4)   |
| Gd1  | N1D  | 2.935(2)   | C4A  | C5A  | 1.388(4)   |
| Gd1  | O1W  | 2.3739(15) | C5A  | C6A  | 1.369(6)   |
| P1   | O1   | 1.4985(16) | C6A  | C7A  | 1.382(6)   |
| P1   | C2   | 1.818(2)   | C7A  | C8A  | 1.382(4)   |
| P1   | C9   | 1.791(2)   | C9A  | C10A | 1.394(3)   |
| P1   | C15  | 1.787(2)   | C9A  | C14A | 1.392(3)   |
| O2   | C1   | 1.219(3)   | C10A | C11A | 1.386(4)   |
| C1   | C2   | 1.515(3)   | C11A | C12A | 1.384(4)   |
| C1   | C3   | 1.490(3)   | C12A | C13A | 1.384(4)   |
| C3   | C4   | 1.395(4)   | C13A | C14A | 1.383(3)   |
| C3   | C8   | 1.387(4)   | C15A | C16A | 1.397(3)   |
| C4   | C5   | 1.376(4)   | C15A | C20A | 1.406(3)   |
| C5   | C6   | 1.378(5)   | C16A | C17A | 1.378(4)   |
| C6   | C7   | 1.381(5)   | C17A | C18A | 1.385(4)   |
| C7   | C8   | 1.389(4)   | C18A | C19A | 1.387(4)   |
| C9   | C10  | 1.382(4)   | C19A | C20A | 1.388(3)   |
| C9   | C14  | 1.388(3)   | O3B  | N1B  | 1.261(3)   |
| C10  | C11  | 1.380(4)   | O4B  | N1B  | 1.277(3)   |
| C11  | C12  | 1.371(5)   | O5B  | N1B  | 1.215(3)   |
| C12  | C13  | 1.384(5)   | O3C  | N1C  | 1.268(3)   |
| C13  | C14  | 1.379(4)   | O4C  | N1C  | 1.269(3)   |
| C15  | C16  | 1.400(3)   | O5C  | N1C  | 1.217(3)   |
| C15  | C20  | 1.391(3)   | O3D  | N1D  | 1.286(3)   |
| C16  | C17  | 1.383(4)   | O4D  | N1D  | 1.263(3)   |
| C17  | C18  | 1.373(5)   | O5D  | N1D  | 1.206(3)   |
| C18  | C19  | 1.375(5)   |      |      |            |



Table 5 Bond Angles for Gd(NO<sub>3</sub>)<sub>3</sub>(4)<sub>2</sub>(H<sub>2</sub>O).

| Atom | Atom | Atom | Angle/°   | Atom | Atom | Atom | Angle/°    |
|------|------|------|-----------|------|------|------|------------|
| O1   | Gd1  | O3B  | 72.49(6)  | C5   | C4   | C3   | 120.4(3)   |
| O1   | Gd1  | O4B  | 123.89(6) | C4   | C5   | C6   | 120.4(3)   |
| O1   | Gd1  | N1B  | 97.98(6)  | C5   | C6   | C7   | 119.9(3)   |
| O1   | Gd1  | O3C  | 145.83(6) | C6   | C7   | C8   | 120.1(3)   |
| O1   | Gd1  | O4C  | 150.96(6) | C3   | C8   | C7   | 120.3(3)   |
| O1   | Gd1  | N1C  | 160.15(6) | C10  | C9   | P1   | 124.66(19) |
| O1   | Gd1  | O3D  | 75.77(6)  | C10  | C9   | C14  | 118.9(2)   |
| O1   | Gd1  | O4D  | 79.82(6)  | C14  | C9   | P1   | 116.42(19) |
| O1   | Gd1  | N1D  | 76.13(6)  | C11  | C10  | C9   | 120.3(3)   |
| O1   | Gd1  | O1W  | 83.00(6)  | C12  | C11  | C10  | 120.5(3)   |
| O1A  | Gd1  | O1   | 84.18(6)  | C11  | C12  | C13  | 119.8(3)   |
| O1A  | Gd1  | O3B  | 78.95(6)  | C14  | C13  | C12  | 119.8(3)   |
| O1A  | Gd1  | O4B  | 81.04(7)  | C13  | C14  | C9   | 120.7(3)   |
| O1A  | Gd1  | N1B  | 78.25(6)  | C16  | C15  | P1   | 120.58(19) |
| O1A  | Gd1  | O3C  | 127.85(6) | C20  | C15  | P1   | 118.37(18) |
| O1A  | Gd1  | O4C  | 77.69(6)  | C20  | C15  | C16  | 120.6(2)   |
| O1A  | Gd1  | N1C  | 102.92(6) | C17  | C16  | C15  | 119.0(3)   |
| O1A  | Gd1  | O3D  | 125.88(6) | C18  | C17  | C16  | 120.2(3)   |
| O1A  | Gd1  | O4D  | 76.35(6)  | C17  | C18  | C19  | 121.0(3)   |
| O1A  | Gd1  | N1D  | 100.82(6) | C18  | C19  | C20  | 120.2(3)   |
| O1A  | Gd1  | O1W  | 151.68(6) | C19  | C20  | C15  | 119.1(3)   |
| O3B  | Gd1  | N1B  | 25.66(6)  | O1A  | P1A  | C1A  | 109.35(10) |
| O3B  | Gd1  | O3C  | 120.21(6) | O1A  | P1A  | C9A  | 109.86(10) |
| O3B  | Gd1  | O4C  | 124.74(6) | O1A  | P1A  | C15A | 111.03(10) |
| O3B  | Gd1  | N1C  | 126.81(6) | C9A  | P1A  | C1A  | 108.62(10) |
| O3B  | Gd1  | O3D  | 136.91(6) | C9A  | P1A  | C15A | 108.49(10) |
| O3B  | Gd1  | O4D  | 144.41(6) | C15A | P1A  | C1A  | 109.45(11) |
| O3B  | Gd1  | N1D  | 148.49(6) | P1A  | O1A  | Gd1  | 161.71(11) |
| O4B  | Gd1  | O3B  | 51.62(6)  | C2A  | C1A  | P1A  | 116.78(16) |
| O4B  | Gd1  | N1B  | 25.98(6)  | O2A  | C2A  | C1A  | 119.6(2)   |
| O4B  | Gd1  | O3C  | 78.21(7)  | O2A  | C2A  | C3A  | 121.7(2)   |
| O4B  | Gd1  | O4C  | 75.63(7)  | C3A  | C2A  | C1A  | 118.7(2)   |
| O4B  | Gd1  | N1C  | 75.83(6)  | C4A  | C3A  | C2A  | 122.6(2)   |
| O4B  | Gd1  | O3D  | 150.43(7) | C4A  | C3A  | C8A  | 119.5(3)   |
| O4B  | Gd1  | O4D  | 145.24(6) | C8A  | C3A  | C2A  | 117.9(2)   |
| O4B  | Gd1  | N1D  | 159.89(6) | C5A  | C4A  | C3A  | 119.5(3)   |
| N1B  | Gd1  | N1C  | 101.60(6) | C6A  | C5A  | C4A  | 121.2(4)   |
| N1B  | Gd1  | N1D  | 174.11(6) | C5A  | C6A  | C7A  | 119.6(3)   |
| O3C  | Gd1  | N1B  | 100.04(7) | C8A  | C7A  | C6A  | 120.6(3)   |
| O3C  | Gd1  | O4C  | 50.98(6)  | C7A  | C8A  | C3A  | 119.7(3)   |
| O3C  | Gd1  | N1C  | 25.44(6)  | C10A | C9A  | P1A  | 118.49(17) |
| O3C  | Gd1  | O3D  | 75.07(7)  | C14A | C9A  | P1A  | 121.47(17) |
| O3C  | Gd1  | O4D  | 95.23(7)  | C14A | C9A  | C10A | 120.0(2)   |
| O3C  | Gd1  | N1D  | 85.15(7)  | C11A | C10A | C9A  | 119.6(2)   |
| O4C  | Gd1  | N1B  | 100.26(7) | C12A | C11A | C10A | 120.2(2)   |
| O4C  | Gd1  | N1C  | 25.54(6)  | C11A | C12A | C13A | 120.3(2)   |
| O4C  | Gd1  | N1D  | 85.15(7)  | C14A | C13A | C12A | 120.0(2)   |
| N1C  | Gd1  | N1D  | 84.28(6)  | C13A | C14A | C9A  | 119.9(2)   |
| O3D  | Gd1  | N1B  | 153.23(6) | C16A | C15A | P1A  | 117.54(17) |
| O3D  | Gd1  | O4C  | 96.73(7)  | C16A | C15A | C20A | 119.8(2)   |

|     |     |     |            |      |      |      |            |
|-----|-----|-----|------------|------|------|------|------------|
| O3D | Gd1 | N1C | 85.21(6)   | C20A | C15A | P1A  | 122.60(17) |
| O3D | Gd1 | N1D | 25.82(6)   | C17A | C16A | C15A | 119.8(2)   |
| O4D | Gd1 | N1B | 154.60(6)  | C16A | C17A | C18A | 120.5(2)   |
| O4D | Gd1 | O4C | 74.00(7)   | C17A | C18A | C19A | 120.2(2)   |
| O4D | Gd1 | N1C | 83.85(6)   | C18A | C19A | C20A | 120.1(2)   |
| O4D | Gd1 | O3D | 51.07(5)   | C19A | C20A | C15A | 119.5(2)   |
| O4D | Gd1 | N1D | 25.25(6)   | N1B  | O3B  | Gd1  | 95.95(13)  |
| O1W | Gd1 | O3B | 73.14(6)   | N1B  | O4B  | Gd1  | 96.41(13)  |
| O1W | Gd1 | O4B | 85.36(6)   | O3B  | N1B  | Gd1  | 58.39(11)  |
| O1W | Gd1 | N1B | 78.67(6)   | O3B  | N1B  | O4B  | 116.0(2)   |
| O1W | Gd1 | O3C | 72.48(6)   | O4B  | N1B  | Gd1  | 57.61(12)  |
| O1W | Gd1 | O4C | 122.65(6)  | O5B  | N1B  | Gd1  | 177.7(2)   |
| O1W | Gd1 | N1C | 97.60(6)   | O5B  | N1B  | O3B  | 121.6(2)   |
| O1W | Gd1 | O3D | 74.76(6)   | O5B  | N1B  | O4B  | 122.4(2)   |
| O1W | Gd1 | O4D | 125.61(6)  | N1C  | O3C  | Gd1  | 97.28(13)  |
| O1W | Gd1 | N1D | 100.44(6)  | N1C  | O4C  | Gd1  | 96.08(13)  |
| O1  | P1  | C2  | 111.08(11) | O3C  | N1C  | Gd1  | 57.27(11)  |
| O1  | P1  | C9  | 112.91(10) | O3C  | N1C  | O4C  | 115.64(19) |
| O1  | P1  | C15 | 109.73(10) | O4C  | N1C  | Gd1  | 58.38(11)  |
| C9  | P1  | C2  | 109.13(11) | O5C  | N1C  | Gd1  | 178.77(17) |
| C15 | P1  | C2  | 105.33(10) | O5C  | N1C  | O3C  | 121.6(2)   |
| C15 | P1  | C9  | 108.33(11) | O5C  | N1C  | O4C  | 122.7(2)   |
| P1  | O1  | Gd1 | 156.31(10) | N1D  | O3D  | Gd1  | 96.32(13)  |
| O2  | C1  | C2  | 119.4(2)   | N1D  | O4D  | Gd1  | 97.47(13)  |
| O2  | C1  | C3  | 119.6(2)   | O3D  | N1D  | Gd1  | 57.86(11)  |
| C3  | C1  | C2  | 121.0(2)   | O4D  | N1D  | Gd1  | 57.28(11)  |
| C1  | C2  | P1  | 110.19(15) | O4D  | N1D  | O3D  | 115.13(19) |
| C4  | C3  | C1  | 117.7(2)   | O5D  | N1D  | Gd1  | 178.19(18) |
| C8  | C3  | C1  | 123.3(2)   | O5D  | N1D  | O3D  | 121.5(2)   |
| C8  | C3  | C4  | 118.9(2)   | O5D  | N1D  | O4D  | 123.4(2)   |

Table 6 Hydrogen Bonds for Gd(NO<sub>3</sub>)<sub>3</sub>(4)<sub>2</sub>(H<sub>2</sub>O).

| D   | H    | A                | d(D-H)/Å | d(H-A)/Å | d(D-A)/Å | D-H-A/° |
|-----|------|------------------|----------|----------|----------|---------|
| O1W | H1WA | O2               | 0.90     | 1.84     | 2.730(2) | 175.4   |
| O1W | H1WB | O3D <sup>1</sup> | 0.82(4)  | 1.93(4)  | 2.752(2) | 172(4)  |

<sup>1</sup>2-X,1-Y,1-Z

Table 7 Torsion Angles for Gd(NO<sub>3</sub>)<sub>3</sub>(4)<sub>2</sub>(H<sub>2</sub>O).

| A   | B   | C   | D   | Angle/°   | A   | B   | C    | D    | Angle/°   |
|-----|-----|-----|-----|-----------|-----|-----|------|------|-----------|
| Gd1 | O3B | N1B | O4B | 2.4(2)    | C15 | C16 | C17  | C18  | -0.1(4)   |
| Gd1 | O3B | N1B | O5B | -177.3(3) | C16 | C15 | C20  | C19  | -0.6(4)   |
| Gd1 | O4B | N1B | O3B | -2.4(2)   | C16 | C17 | C18  | C19  | -0.8(4)   |
| Gd1 | O4B | N1B | O5B | 177.3(3)  | C17 | C18 | C19  | C20  | 1.0(4)    |
| Gd1 | O3C | N1C | O4C | -1.4(2)   | C18 | C19 | C20  | C15  | -0.3(4)   |
| Gd1 | O3C | N1C | O5C | 179.3(2)  | C20 | C15 | C16  | C17  | 0.8(3)    |
| Gd1 | O4C | N1C | O3C | 1.3(2)    | P1A | C1A | C2A  | O2A  | -77.5(3)  |
| Gd1 | O4C | N1C | O5C | -179.4(2) | P1A | C1A | C2A  | C3A  | 104.0(2)  |
| Gd1 | O3D | N1D | O4D | -1.4(2)   | P1A | C9A | C10A | C11A | -178.8(2) |

|                            |                                |
|----------------------------|--------------------------------|
| Gd1 O3DN1DO5D 178.0(2)     | P1A C9A C14A C13A 178.89(18)   |
| Gd1 O4DN1DO3D 1.4(2)       | P1A C15A C16A C17A 178.2(2)    |
| Gd1 O4DN1DO5D -178.0(2)    | P1A C15A C20A C19A -177.84(18) |
| P1 C9 C10 C11 180.0(3)     | O1A P1A C1A C2A -140.17(17)    |
| P1 C9 C14 C13 179.2(3)     | O1A P1A C9A C10A 18.6(2)       |
| P1 C15 C16 C17 -171.09(18) | O1A P1A C9A C14A -161.00(18)   |
| P1 C15 C20 C19 171.5(2)    | O1A P1A C15A C16A 19.8(2)      |
| O1 P1 C2 C1 -63.50(19)     | O1A P1A C15A C20A -161.80(18)  |
| O1 P1 C9 C10 -131.8(2)     | O2A C2A C3A C4A 162.9(3)       |
| O1 P1 C9 C14 49.4(2)       | O2A C2A C3A C8A -16.4(3)       |
| O1 P1 C15 C16 -158.68(17)  | C1A P1A O1A Gd1 -34.3(3)       |
| O1 P1 C15 C20 29.2(2)      | C1A P1A C9A C10A -101.0(2)     |
| O2 C1 C2 P1 76.3(3)        | C1A P1A C9A C14A 79.4(2)       |
| O2 C1 C3 C4 3.3(3)         | C1A P1A C15A C16A 140.62(18)   |
| O2 C1 C3 C8 -173.9(2)      | C1A P1A C15A C20A -41.0(2)     |
| C1 C3 C4 C5 -177.5(3)      | C1A C2A C3A C4A -18.5(4)       |
| C1 C3 C8 C7 177.2(2)       | C1A C2A C3A C8A 162.2(2)       |
| C2 P1 O1 Gd1 -66.3(3)      | C2A C3A C4A C5A -178.7(3)      |
| C2 P1 C9 C10 -7.8(3)       | C2A C3A C8A C7A 179.6(2)       |
| C2 P1 C9 C14 173.5(2)      | C3A C4A C5A C6A -0.8(6)        |
| C2 P1 C15 C16 81.7(2)      | C4A C3A C8A C7A 0.3(4)         |
| C2 P1 C15 C20 -90.4(2)     | C4A C5A C6A C7A 0.2(6)         |
| C2 C1 C3 C4 -178.5(2)      | C5A C6A C7A C8A 0.6(5)         |
| C2 C1 C3 C8 4.2(3)         | C6A C7A C8A C3A -0.9(5)        |
| C3 C1 C2 P1 -101.9(2)      | C8A C3A C4A C5A 0.5(5)         |
| C3 C4 C5 C6 0.2(5)         | C9A P1A O1A Gd1 -153.4(3)      |
| C4 C3 C8 C7 0.0(4)         | C9A P1A C1A C2A -20.3(2)       |
| C4 C5 C6 C7 -0.1(5)        | C9A P1A C15A C16A -101.01(19)  |
| C5 C6 C7 C8 0.0(5)         | C9A P1A C15A C20A 77.4(2)      |
| C6 C7 C8 C3 0.1(4)         | C9A C10A C11A C12A 0.3(4)      |
| C8 C3 C4 C5 -0.1(4)        | C10A C9A C14A C13A -0.7(4)     |
| C9 P1 O1 Gd1 56.7(3)       | C10A C11A C12A C13A -1.5(4)    |
| C9 P1 C2 C1 171.38(17)     | C11A C12A C13A C14A 1.6(4)     |
| C9 P1 C15 C16 -35.0(2)     | C12A C13A C14A C9A -0.5(4)     |
| C9 P1 C15 C20 152.93(18)   | C14A C9A C10A C11A 0.8(4)      |
| C9 C10 C11 C12 1.2(6)      | C15A P1A O1A Gd1 86.6(3)       |
| C10 C9 C14 C13 0.4(5)      | C15A P1A C1A C2A 98.00(19)     |
| C10 C11 C12 C13 -0.2(6)    | C15A P1A C9A C10A 140.13(19)   |
| C11 C12 C13 C14 -0.7(6)    | C15A P1A C9A C14A -39.5(2)     |
| C12 C13 C14 C9 0.6(5)      | C15A C16A C17A C18A 0.0(4)     |
| C14 C9 C10 C11 -1.3(5)     | C16A C15A C20A C19A 0.5(3)     |
| C15 P1 O1 Gd1 177.6(2)     | C16A C17A C18A C19A 0.1(4)     |
| C15 P1 C2 C1 55.2(2)       | C17A C18A C19A C20A 0.2(4)     |
| C15 P1 C9 C10 106.4(3)     | C18A C19A C20A C15A -0.5(4)    |
| C15 P1 C9 C14 -72.4(2)     | C20A C15A C16A C17A -0.3(4)    |

Table 8 Hydrogen Atom Coordinates ( $\text{\AA}\times 10^4$ ) and Isotropic Displacement Parameters ( $\text{\AA}^2\times 10^3$ ) for  $\text{Gd}(\text{NO}_3)_3(4)_2(\text{H}_2\text{O})$ .

| Atom | x    | y    | z    | U(eq) |
|------|------|------|------|-------|
| H2A  | 9713 | 2437 | 4643 | 30    |
| H2B  | 9799 | 1206 | 4388 | 30    |

|      |           |          |          |        |
|------|-----------|----------|----------|--------|
| H4   | 14110     | 353      | 4063     | 45     |
| H5   | 15461     | -1664    | 3867     | 57     |
| H6   | 14573     | -3083    | 3745     | 58     |
| H7   | 12313     | -2481    | 3824     | 51     |
| H8   | 10941     | -456     | 4026     | 38     |
| H10  | 7496      | 2134     | 4424     | 55     |
| H11  | 5268      | 2702     | 4424     | 68     |
| H12  | 4273      | 4188     | 3391     | 57     |
| H13  | 5515      | 5134     | 2345     | 62     |
| H14  | 7734      | 4611     | 2357     | 51     |
| H16  | 9112      | 1099     | 2816     | 37     |
| H17  | 10416     | -314     | 2031     | 55     |
| H18  | 12440     | -212     | 1403     | 63     |
| H19  | 13180     | 1314     | 1515     | 56     |
| H20  | 11915     | 2735     | 2299     | 36     |
| H1AA | 8879      | 9385     | 1607     | 31     |
| H1AB | 9883      | 9168     | 843      | 31     |
| H4A  | 6913      | 10092    | 2114     | 58     |
| H5A  | 5102      | 11553    | 2680     | 82     |
| H6A  | 4026      | 13565    | 1959     | 76     |
| H7A  | 4746      | 14146    | 649      | 63     |
| H8A  | 6519      | 12698    | 55       | 46     |
| H10A | 6527      | 7512     | 2240     | 35     |
| H11A | 4441      | 7762     | 2063     | 42     |
| H12A | 3948      | 8232     | 828      | 38     |
| H13A | 5500      | 8548     | -240     | 34     |
| H14A | 7589      | 8296     | -74      | 29     |
| H16A | 10518     | 5066     | 1356     | 34     |
| H17A | 12030     | 3890     | 505      | 43     |
| H18A | 12475     | 4898     | -780     | 43     |
| H19A | 11407     | 7102     | -1226    | 38     |
| H20A | 9892      | 8314     | -380     | 30     |
| H1WA | 11663     | 3951     | 4038     | 38     |
| H1WB | 11450(40) | 4840(30) | 4450(20) | 55(11) |

## D. $\text{Eu}(\text{NO}_3)_3 \cdot 4(\text{H}_2\text{O})$

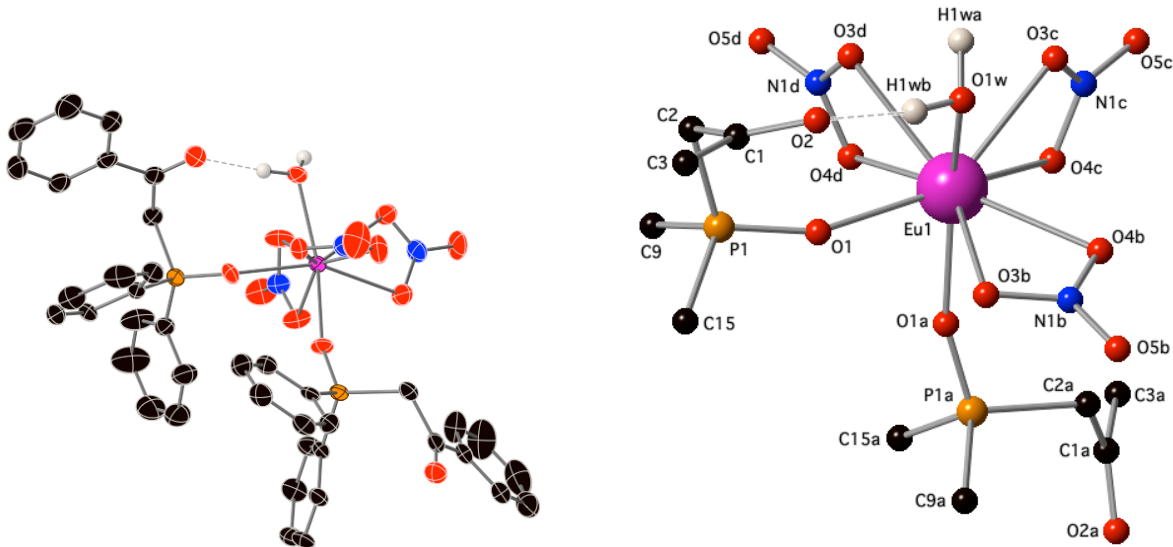

### Experimental

Single crystals of  $\text{C}_{40}\text{H}_{36}\text{EuN}_3\text{O}_{14}\text{P}_2$  were grown at 4 °C by diffusion of hexane into a solution of the 1:3  $\text{Eu}(\text{NO}_3)_3$ -4 complex in chloroform and used as received. A suitable crystal was selected and mounted using a small amount of paratone oil on a nylon loop on a Bruker APEX-II CCD diffractometer. The crystal was kept at 173(2) K during data collection. Using Olex2 [1], the structure was solved with the ShelXS [2] structure solution program using Structure Expansion and refined with the ShelXL [3] refinement package using Least Squares minimization.

1. Dolomanov, O.V., Bourhis, L.J., Gildea, R.J., Howard, J.A.K. & Puschmann, H. (2009), *J. Appl. Cryst.* 42, 339-341.
2. Sheldrick, G.M. (2008). *Acta Cryst.* A64, 112-122.
3. Sheldrick, G.M. (2015). *Acta Cryst.* C71, 3-8.

### Crystal structure determination of $\text{Eu}(\text{NO}_3)_3 \cdot 4(\text{H}_2\text{O})$

**Crystal Data** for  $\text{C}_{40}\text{H}_{36}\text{EuN}_3\text{O}_{14}\text{P}_2$  ( $M = 996.62$  g/mol): triclinic, space group P-1 (no. 2),  $a = 11.2311(19)$  Å,  $b = 11.6325(19)$  Å,  $c = 18.480(3)$  Å,  $\alpha = 72.083(2)^\circ$ ,  $\beta = 75.706(2)^\circ$ ,  $\gamma = 66.718(2)^\circ$ ,  $V = 2088.3(6)$  Å<sup>3</sup>,  $Z = 2$ ,  $T = 173.15$  K,  $\mu(\text{MoK}\alpha) = 1.649$  mm<sup>-1</sup>,  $D_{\text{calc}} = 1.585$  g/cm<sup>3</sup>, 21495 reflections measured ( $3.922^\circ \leq 2\Theta \leq 50.86^\circ$ ), 7660 unique ( $R_{\text{int}} = 0.0483$ ,  $R_{\text{sigma}} = 0.0523$ ) which were used in all calculations. The final  $R_1$  was 0.0452 ( $I > 2\sigma(I)$ ) and  $wR_2$  was 0.1246 (all data).

### Refinement model description

Number of restraints - 0, number of constraints - unknown.

Details:

1. Fixed Uiso

At 1.2 times of:

All C(H) groups, All C(H,H) groups

At 1.5 times of:

All O(H,H) groups

2.a Rotating group:

O1W(H1WA,H1WB)

2.b Secondary CH2 refined with riding coordinates:

C2(H2A,H2B), C2A(H2AA,H2AB)

2.c Aromatic/amide H refined with riding coordinates:

C4(H4), C5(H5), C6(H6), C7(H7), C8(H8), C10(H10), C11(H11), C12(H12),  
C13(H13), C14(H14), C16(H16), C17(H17), C18(H18), C19(H19), C20(H20), C4A(H4A),  
C5A(H5A), C6A(H6A), C7A(H7A), C8A(H8A), C10A(H10A), C11A(H11A), C12A(H12A),  
C13A(H13A), C14A(H14A), C16A(H16A), C17A(H17A), C18A(H18A), C19A(H19A),  
C20A(H20A)

Table 1 Crystal data and structure refinement for Eu(NO<sub>3</sub>)<sub>3</sub>(4)<sub>2</sub>(H<sub>2</sub>O)

|                                             |                                                                                 |
|---------------------------------------------|---------------------------------------------------------------------------------|
| Structure Number                            | <b>5</b>                                                                        |
| CCDC Number                                 | 1484663                                                                         |
| Empirical formula                           | C <sub>40</sub> H <sub>36</sub> EuN <sub>3</sub> O <sub>14</sub> P <sub>2</sub> |
| Formula weight                              | 996.62                                                                          |
| Temperature/K                               | 173(2)                                                                          |
| Crystal system                              | triclinic                                                                       |
| Space group                                 | P-1                                                                             |
| a/Å                                         | 11.2311(19)                                                                     |
| b/Å                                         | 11.6325(19)                                                                     |
| c/Å                                         | 18.480(3)                                                                       |
| α/°                                         | 72.083(2)                                                                       |
| β/°                                         | 75.706(2)                                                                       |
| γ/°                                         | 66.718(2)                                                                       |
| Volume/Å <sup>3</sup>                       | 2088.3(6)                                                                       |
| Z                                           | 2                                                                               |
| ρ <sub>calc</sub> /g/cm <sup>3</sup>        | 1.585                                                                           |
| μ/mm <sup>-1</sup>                          | 1.649                                                                           |
| F(000)                                      | 1004.0                                                                          |
| Crystal size/mm <sup>3</sup>                | 0.288 × 0.231 × 0.11                                                            |
| Radiation                                   | MoKα (λ = 0.71073)                                                              |
| 2θ range for data collection/°              | 3.922 to 50.86                                                                  |
| Index ranges                                | -13 ≤ h ≤ 13, -14 ≤ k ≤ 13, -22 ≤ l ≤ 22                                        |
| Reflections collected                       | 21495                                                                           |
| Independent reflections                     | 7660 [R <sub>int</sub> = 0.0483, R <sub>sigma</sub> = 0.0523]                   |
| Data/restraints/parameters                  | 7660/0/542                                                                      |
| Goodness-of-fit on F <sup>2</sup>           | 1.048                                                                           |
| Final R indexes [I ≥ 2σ (I)]                | R <sub>1</sub> = 0.0452, wR <sub>2</sub> = 0.1178                               |
| Final R indexes [all data]                  | R <sub>1</sub> = 0.0511, wR <sub>2</sub> = 0.1246                               |
| Largest diff. peak/hole / e Å <sup>-3</sup> | 2.82/-1.62                                                                      |

Table 2 Fractional Atomic Coordinates (×10<sup>4</sup>) and Equivalent Isotropic Displacement Parameters (Å<sup>2</sup>×10<sup>3</sup>) for Eu(NO<sub>3</sub>)<sub>3</sub>(4)<sub>2</sub>(H<sub>2</sub>O). U<sub>eq</sub> is defined as 1/3 of the trace of the orthogonalised U<sub>ij</sub> tensor.

| Atom | x          | y         | z          | U(eq)     |
|------|------------|-----------|------------|-----------|
| Eu1  | 5166.2(2)  | 8887.1(2) | 6778.0(2)  | 22.47(10) |
| P1   | 5437.8(10) | 12021(1)  | 6671.8(6)  | 23.1(2)   |
| O1   | 5080(3)    | 10840(3)  | 6889.3(18) | 29.8(7)   |
| O2   | 2884(3)    | 12790(3)  | 5842(2)    | 42.3(9)   |
| C1   | 3412(4)    | 13524(4)  | 5843(3)    | 30.5(10)  |
| C2   | 4902(4)    | 13049(4)  | 5764(2)    | 28.5(10)  |
| C3   | 2617(4)    | 14837(4)  | 5938(2)    | 29.7(10)  |
| C4   | 1260(5)    | 15218(5)  | 5987(3)    | 40.8(12)  |
| C5   | 468(5)     | 16416(6)  | 6101(4)    | 54.3(15)  |
| C6   | 988(6)     | 17255(6)  | 6174(3)    | 53.9(16)  |
| C7   | 2319(6)    | 16902(5)  | 6124(3)    | 46.8(13)  |
| C8   | 3133(5)    | 15698(5)  | 6010(3)    | 35.7(11)  |
| C9   | 7162(4)    | 11668(4)  | 6605(3)    | 28.7(10)  |

|      |            |            |             |          |
|------|------------|------------|-------------|----------|
| C10  | 7895(5)    | 12230(6)   | 5997(3)     | 51.5(15) |
| C11  | 9219(5)    | 11908(7)   | 6000(4)     | 68(2)    |
| C12  | 9813(5)    | 11021(6)   | 6614(4)     | 53.7(15) |
| C13  | 9071(5)    | 10473(6)   | 7228(4)     | 56.2(17) |
| C14  | 7760(5)    | 10791(6)   | 7217(3)     | 47.1(14) |
| C15  | 4598(4)    | 12960(4)   | 7362(2)     | 25.3(9)  |
| C16  | 5057(5)    | 13859(4)   | 7446(3)     | 34.1(11) |
| C17  | 4278(6)    | 14699(5)   | 7903(3)     | 48.7(15) |
| C18  | 3098(6)    | 14627(6)   | 8289(3)     | 56.6(17) |
| C19  | 2641(5)    | 13740(6)   | 8214(3)     | 50.7(15) |
| C20  | 3386(5)    | 12895(5)   | 7750(3)     | 33(1)    |
| P1A  | 6137.1(10) | 7358.5(11) | 8750.6(6)   | 22.6(2)  |
| O1A  | 5934(3)    | 8097(3)    | 7942.6(16)  | 28.9(7)  |
| O2A  | 6798(3)    | 4481(3)    | 10068.8(19) | 36.0(8)  |
| C1A  | 6976(4)    | 4653(4)    | 9376(3)     | 27.5(10) |
| C2A  | 6002(4)    | 5790(4)    | 8904(3)     | 28.7(10) |
| C3A  | 8098(4)    | 3759(4)    | 8975(3)     | 30.9(10) |
| C4A  | 8525(6)    | 4083(5)    | 8192(3)     | 51.1(14) |
| C5A  | 9590(7)    | 3221(7)    | 7850(4)     | 73(2)    |
| C6A  | 10226(6)   | 2021(7)    | 8284(5)     | 69(2)    |
| C7A  | 9811(6)    | 1684(6)    | 9058(4)     | 57.1(17) |
| C8A  | 8758(5)    | 2544(5)    | 9405(3)     | 42.6(12) |
| C9A  | 4943(4)    | 8193(4)    | 9435(2)     | 24.4(9)  |
| C10A | 4677(4)    | 7600(5)    | 10191(3)    | 30.8(10) |
| C11A | 3787(4)    | 8308(5)    | 10701(3)    | 34.5(11) |
| C12A | 3141(5)    | 9600(5)    | 10437(3)    | 38.0(11) |
| C13A | 3419(5)    | 10204(5)   | 9667(3)     | 39.9(12) |
| C14A | 4314(4)    | 9499(5)    | 9172(3)     | 31.4(10) |
| C15A | 7740(4)    | 7131(4)    | 8907(2)     | 24.0(9)  |
| C16A | 8668(4)    | 7291(5)    | 8267(3)     | 33.4(11) |
| C17A | 9911(5)    | 7136(5)    | 8372(3)     | 39.1(12) |
| C18A | 10199(4)   | 6849(5)    | 9106(3)     | 34.5(11) |
| C19A | 9281(4)    | 6681(5)    | 9733(3)     | 32.9(10) |
| C20A | 8050(4)    | 6821(4)    | 9638(3)     | 28.7(10) |
| O3B  | 3126(3)    | 9732(3)    | 7648.8(18)  | 30.3(7)  |
| O4B  | 3563(3)    | 7832(3)    | 7522(2)     | 46.0(9)  |
| O5B  | 1866(4)    | 8662(4)    | 8305(3)     | 68.1(14) |
| N1B  | 2821(4)    | 8738(4)    | 7841(3)     | 37(1)    |
| O3C  | 5209(4)    | 7641(3)    | 5891(2)     | 43.9(9)  |
| O4C  | 6373(4)    | 6543(3)    | 6798(2)     | 44.1(9)  |
| O5C  | 6311(4)    | 5619(3)    | 5950(2)     | 47.4(9)  |
| N1C  | 5981(4)    | 6564(4)    | 6197(2)     | 35.2(9)  |
| O3D  | 6357(3)    | 9756(4)    | 5528.6(18)  | 39.7(8)  |
| O4D  | 7539(3)    | 8624(3)    | 6426.6(19)  | 39.4(8)  |
| O5D  | 8433(3)    | 9486(4)    | 5321(2)     | 51.6(10) |
| N1D  | 7495(4)    | 9289(4)    | 5742(2)     | 32.8(9)  |
| O1W  | 3508(3)    | 10226(3)   | 5979.6(17)  | 29.2(7)  |

Table 3 Anisotropic Displacement Parameters ( $\text{\AA}^2 \times 10^3$ ) for  $\text{Eu}(\text{NO}_3)_3(4)_2(\text{H}_2\text{O})$ . The Anisotropic displacement factor exponent takes the form:  $-2\pi^2[h^2a^{*2}U_{11}+2hka^*b^*U_{12}+\dots]$ .

| Atom | $U_{11}$ | $U_{22}$ | $U_{33}$ | $U_{23}$ | $U_{13}$ | $U_{12}$ |
|------|----------|----------|----------|----------|----------|----------|
|------|----------|----------|----------|----------|----------|----------|

|      |           |           |           |           |           |           |
|------|-----------|-----------|-----------|-----------|-----------|-----------|
| Eu1  | 28.74(14) | 21.87(15) | 19.01(15) | -8.56(10) | -7.96(9)  | -5.55(10) |
| P1   | 28.7(5)   | 23.4(6)   | 19.4(6)   | -7.3(5)   | -5.1(4)   | -8.6(4)   |
| O1   | 38.1(16)  | 27.2(17)  | 31.8(17)  | -14.1(14) | -8.1(14)  | -12.1(13) |
| O2   | 42.6(18)  | 32.4(19)  | 55(2)     | -12.9(17) | -17.6(17) | -8.3(16)  |
| C1   | 39(2)     | 30(3)     | 22(2)     | -5(2)     | -9.4(19)  | -10(2)    |
| C2   | 35(2)     | 28(2)     | 19(2)     | -7.8(19)  | -4.0(18)  | -6.9(19)  |
| C3   | 36(2)     | 27(2)     | 21(2)     | -4.4(19)  | -10.3(18) | -2.6(19)  |
| C4   | 44(3)     | 31(3)     | 45(3)     | -9(2)     | -15(2)    | -6(2)     |
| C5   | 42(3)     | 44(3)     | 67(4)     | -16(3)    | -14(3)    | 2(3)      |
| C6   | 63(4)     | 37(3)     | 50(3)     | -18(3)    | -22(3)    | 10(3)     |
| C7   | 65(4)     | 33(3)     | 45(3)     | -13(2)    | -18(3)    | -12(3)    |
| C8   | 44(3)     | 33(3)     | 26(2)     | -4(2)     | -11(2)    | -8(2)     |
| C9   | 33(2)     | 28(2)     | 25(2)     | -9.1(19)  | -7.5(18)  | -6.5(19)  |
| C10  | 36(3)     | 75(4)     | 32(3)     | 0(3)      | -4(2)     | -18(3)    |
| C11  | 38(3)     | 104(6)    | 50(4)     | -7(4)     | 2(3)      | -28(3)    |
| C12  | 30(2)     | 62(4)     | 70(4)     | -20(3)    | -10(3)    | -11(3)    |
| C13  | 45(3)     | 50(4)     | 72(4)     | 5(3)      | -29(3)    | -17(3)    |
| C14  | 43(3)     | 49(3)     | 47(3)     | 9(3)      | -18(2)    | -23(3)    |
| C15  | 38(2)     | 22(2)     | 18(2)     | -4.3(18)  | -9.9(18)  | -9.2(18)  |
| C16  | 48(3)     | 30(3)     | 32(3)     | -9(2)     | -19(2)    | -13(2)    |
| C17  | 77(4)     | 27(3)     | 52(3)     | -20(2)    | -39(3)    | -2(3)     |
| C18  | 72(4)     | 52(4)     | 44(3)     | -38(3)    | -26(3)    | 12(3)     |
| C19  | 44(3)     | 66(4)     | 32(3)     | -26(3)    | -3(2)     | 1(3)      |
| C20  | 41(2)     | 35(3)     | 23(2)     | -11(2)    | -2.6(19)  | -12(2)    |
| PIA  | 26.3(5)   | 25.4(6)   | 19.2(5)   | -7.3(5)   | -7.4(4)   | -8.0(4)   |
| O1A  | 34.1(15)  | 34.7(18)  | 16.6(15)  | -5.9(13)  | -9.5(12)  | -7.3(13)  |
| O2A  | 42.9(18)  | 39(2)     | 29.2(19)  | -9.2(15)  | -6.6(14)  | -15.9(15) |
| C1A  | 30(2)     | 28(2)     | 31(3)     | -8(2)     | -4.9(18)  | -16.0(19) |
| C2A  | 33(2)     | 32(2)     | 28(2)     | -13(2)    | -8.1(18)  | -10.5(19) |
| C3A  | 34(2)     | 26(2)     | 41(3)     | -13(2)    | -11(2)    | -11.6(19) |
| C4A  | 55(3)     | 39(3)     | 54(4)     | -18(3)    | 7(3)      | -14(3)    |
| C5A  | 78(4)     | 68(5)     | 68(5)     | -35(4)    | 28(4)     | -29(4)    |
| C6A  | 50(3)     | 55(4)     | 112(6)    | -54(4)    | 6(4)      | -13(3)    |
| C7A  | 45(3)     | 37(3)     | 97(5)     | -31(3)    | -27(3)    | -1(3)     |
| C8A  | 48(3)     | 33(3)     | 56(3)     | -13(2)    | -23(3)    | -13(2)    |
| C9A  | 26.0(19)  | 29(2)     | 23(2)     | -11.5(19) | -9.5(17)  | -7.1(18)  |
| C10A | 33(2)     | 31(3)     | 29(2)     | -5(2)     | -4.4(19)  | -13(2)    |
| C11A | 39(2)     | 45(3)     | 25(2)     | -14(2)    | -1.7(19)  | -18(2)    |
| C12A | 38(2)     | 45(3)     | 36(3)     | -24(2)    | -2(2)     | -10(2)    |
| C13A | 46(3)     | 34(3)     | 40(3)     | -17(2)    | -10(2)    | -5(2)     |
| C14A | 38(2)     | 35(3)     | 25(2)     | -9(2)     | -7.6(19)  | -13(2)    |
| C15A | 28(2)     | 23(2)     | 27(2)     | -7.1(18)  | -8.3(18)  | -10.6(17) |
| C16A | 37(2)     | 42(3)     | 24(2)     | -7(2)     | -5.9(19)  | -16(2)    |
| C17A | 33(2)     | 52(3)     | 33(3)     | -11(2)    | 3(2)      | -20(2)    |
| C18A | 27(2)     | 42(3)     | 40(3)     | -14(2)    | -9(2)     | -12(2)    |
| C19A | 36(2)     | 41(3)     | 28(2)     | -14(2)    | -12(2)    | -12(2)    |
| C20A | 32(2)     | 32(3)     | 27(2)     | -9(2)     | -7.3(18)  | -13.9(19) |
| O3B  | 34.4(16)  | 28.3(17)  | 32.4(18)  | -10.7(14) | -2.4(13)  | -14.0(14) |
| O4B  | 48(2)     | 32(2)     | 64(3)     | -16.3(19) | -4.2(18)  | -18.1(17) |
| O5B  | 49(2)     | 63(3)     | 84(3)     | -14(3)    | 20(2)     | -31(2)    |
| N1B  | 31(2)     | 42(3)     | 40(2)     | -6(2)     | -4.4(18)  | -17.1(19) |
| O3C  | 67(2)     | 28.8(19)  | 37(2)     | -16.6(16) | -26.4(18) | 0.5(17)   |



|     |          |          |          |           |           |           |
|-----|----------|----------|----------|-----------|-----------|-----------|
| O4C | 58(2)    | 28.6(18) | 46(2)    | -17.2(16) | -24.6(18) | 0.4(16)   |
| O5C | 71(2)    | 30.0(19) | 45(2)    | -23.4(17) | -3.8(19)  | -13.3(18) |
| N1C | 47(2)    | 33(2)    | 30(2)    | -15.2(19) | -5.8(18)  | -12.7(19) |
| O3D | 32.0(16) | 59(2)    | 23.9(17) | -9.9(16)  | -7.7(13)  | -9.6(16)  |
| O4D | 33.4(17) | 43(2)    | 29.1(19) | -0.9(16)  | -6.4(14)  | -4.7(15)  |
| O5D | 36.3(19) | 69(3)    | 39(2)    | -11(2)    | 7.1(17)   | -16.8(19) |
| N1D | 31(2)    | 37(2)    | 27(2)    | -13.6(19) | -1.6(17)  | -6.1(17)  |
| O1W | 36.3(16) | 30.3(17) | 23.4(16) | -12.5(14) | -11.4(13) | -5.2(14)  |

Table 4 Bond Lengths for Eu(NO<sub>3</sub>)<sub>3</sub>(4)<sub>2</sub>(H<sub>2</sub>O)

| Atom | Atom | Length/Å | Atom | Atom | Length/Å  |
|------|------|----------|------|------|-----------|
| Eu1  | O1   | 2.306(3) | C19  | C20  | 1.385(7)  |
| Eu1  | O1A  | 2.301(3) | P1A  | O1A  | 1.498(3)  |
| Eu1  | O3B  | 2.486(3) | P1A  | C2A  | 1.820(5)  |
| Eu1  | O4B  | 2.475(4) | P1A  | C9A  | 1.797(4)  |
| Eu1  | N1B  | 2.902(4) | P1A  | C15A | 1.796(4)  |
| Eu1  | O3C  | 2.482(3) | O2A  | C1A  | 1.210(5)  |
| Eu1  | O4C  | 2.513(3) | C1A  | C2A  | 1.525(6)  |
| Eu1  | N1C  | 2.939(4) | C1A  | C3A  | 1.482(6)  |
| Eu1  | O3D  | 2.500(3) | C3A  | C4A  | 1.390(7)  |
| Eu1  | O4D  | 2.498(3) | C3A  | C8A  | 1.397(7)  |
| Eu1  | N1D  | 2.944(4) | C4A  | C5A  | 1.380(8)  |
| Eu1  | O1W  | 2.392(3) | C5A  | C6A  | 1.381(10) |
| P1   | O1   | 1.492(3) | C6A  | C7A  | 1.374(10) |
| P1   | C2   | 1.816(4) | C7A  | C8A  | 1.376(8)  |
| P1   | C9   | 1.794(4) | C9A  | C10A | 1.372(6)  |
| P1   | C15  | 1.777(4) | C9A  | C14A | 1.382(6)  |
| O2   | C1   | 1.218(6) | C10A | C11A | 1.388(6)  |
| C1   | C2   | 1.525(6) | C11A | C12A | 1.373(7)  |
| C1   | C3   | 1.474(6) | C12A | C13A | 1.399(7)  |
| C3   | C4   | 1.396(7) | C13A | C14A | 1.369(7)  |
| C3   | C8   | 1.390(7) | C15A | C16A | 1.388(6)  |
| C4   | C5   | 1.374(7) | C15A | C20A | 1.382(6)  |
| C5   | C6   | 1.372(9) | C16A | C17A | 1.389(7)  |
| C6   | C7   | 1.372(8) | C17A | C18A | 1.382(7)  |
| C7   | C8   | 1.384(7) | C18A | C19A | 1.369(7)  |
| C9   | C10  | 1.373(7) | C19A | C20A | 1.376(6)  |
| C9   | C14  | 1.377(7) | O3B  | N1B  | 1.257(5)  |
| C10  | C11  | 1.383(8) | O4B  | N1B  | 1.264(5)  |
| C11  | C12  | 1.380(9) | O5B  | N1B  | 1.211(5)  |
| C12  | C13  | 1.378(8) | O3C  | N1C  | 1.261(5)  |
| C13  | C14  | 1.373(7) | O4C  | N1C  | 1.282(5)  |
| C15  | C16  | 1.396(6) | O5C  | N1C  | 1.208(5)  |
| C15  | C20  | 1.393(7) | O3D  | N1D  | 1.285(5)  |
| C16  | C17  | 1.379(7) | O4D  | N1D  | 1.265(5)  |
| C17  | C18  | 1.362(9) | O5D  | N1D  | 1.201(5)  |
| C18  | C19  | 1.374(9) |      |      |           |

Table 5 Bond Angles for Eu(NO<sub>3</sub>)<sub>3</sub>(4)<sub>2</sub>(H<sub>2</sub>O).

| Atom | Atom | Atom | Angle/°    | Atom | Atom | Atom | Angle/°    |
|------|------|------|------------|------|------|------|------------|
| O1   | Eu1  | O3B  | 72.52(10)  | C5   | C4   | C3   | 120.2(5)   |
| O1   | Eu1  | O4B  | 123.42(11) | C6   | C5   | C4   | 121.0(5)   |
| O1   | Eu1  | N1B  | 97.84(12)  | C7   | C6   | C5   | 119.7(5)   |
| O1   | Eu1  | O3C  | 145.77(12) | C6   | C7   | C8   | 120.1(5)   |
| O1   | Eu1  | O4C  | 151.16(12) | C7   | C8   | C3   | 120.7(5)   |
| O1   | Eu1  | N1C  | 160.10(12) | C10  | C9   | P1   | 124.2(4)   |
| O1   | Eu1  | O3D  | 75.64(12)  | C10  | C9   | C14  | 119.2(4)   |
| O1   | Eu1  | O4D  | 80.04(12)  | C14  | C9   | P1   | 116.6(4)   |
| O1   | Eu1  | N1D  | 76.22(11)  | C9   | C10  | C11  | 120.2(5)   |
| O1   | Eu1  | O1W  | 82.81(11)  | C12  | C11  | C10  | 120.4(6)   |
| O1A  | Eu1  | O1   | 84.39(11)  | C13  | C12  | C11  | 119.3(5)   |
| O1A  | Eu1  | O3B  | 79.20(10)  | C14  | C13  | C12  | 119.9(5)   |
| O1A  | Eu1  | O4B  | 80.86(12)  | C13  | C14  | C9   | 121.1(5)   |
| O1A  | Eu1  | N1B  | 78.22(11)  | C16  | C15  | P1   | 120.9(4)   |
| O1A  | Eu1  | O3C  | 127.63(11) | C20  | C15  | P1   | 118.3(3)   |
| O1A  | Eu1  | O4C  | 77.56(11)  | C20  | C15  | C16  | 120.3(4)   |
| O1A  | Eu1  | N1C  | 102.98(11) | C17  | C16  | C15  | 119.0(5)   |
| O1A  | Eu1  | O3D  | 125.55(11) | C18  | C17  | C16  | 120.7(5)   |
| O1A  | Eu1  | O4D  | 76.23(11)  | C17  | C18  | C19  | 120.8(5)   |
| O1A  | Eu1  | N1D  | 100.66(11) | C18  | C19  | C20  | 120.2(5)   |
| O1A  | Eu1  | O1W  | 152.05(11) | C19  | C20  | C15  | 119.0(5)   |
| O3B  | Eu1  | N1B  | 25.51(11)  | O1A  | P1A  | C2A  | 109.04(19) |
| O3B  | Eu1  | O4C  | 124.65(12) | O1A  | P1A  | C9A  | 111.35(19) |
| O3B  | Eu1  | N1C  | 126.73(11) | O1A  | P1A  | C15A | 109.90(19) |
| O3B  | Eu1  | O3D  | 136.97(11) | C9A  | P1A  | C2A  | 109.1(2)   |
| O3B  | Eu1  | O4D  | 144.61(11) | C15A | P1A  | C2A  | 109.0(2)   |
| O3B  | Eu1  | N1D  | 148.61(11) | C15A | P1A  | C9A  | 108.51(19) |
| O4B  | Eu1  | O3B  | 51.14(11)  | P1A  | O1A  | Eu1  | 161.7(2)   |
| O4B  | Eu1  | N1B  | 25.65(11)  | O2A  | C1A  | C2A  | 119.5(4)   |
| O4B  | Eu1  | O3C  | 78.76(13)  | O2A  | C1A  | C3A  | 121.6(4)   |
| O4B  | Eu1  | O4C  | 75.89(13)  | C3A  | C1A  | C2A  | 118.9(4)   |
| O4B  | Eu1  | N1C  | 76.31(12)  | C1A  | C2A  | P1A  | 116.2(3)   |
| O4B  | Eu1  | O3D  | 151.02(13) | C4A  | C3A  | C1A  | 122.8(4)   |
| O4B  | Eu1  | O4D  | 145.28(12) | C4A  | C3A  | C8A  | 118.7(5)   |
| O4B  | Eu1  | N1D  | 160.24(12) | C8A  | C3A  | C1A  | 118.5(5)   |
| N1B  | Eu1  | N1C  | 101.74(12) | C5A  | C4A  | C3A  | 120.4(6)   |
| N1B  | Eu1  | N1D  | 174.05(11) | C4A  | C5A  | C6A  | 120.0(7)   |
| O3C  | Eu1  | O3B  | 120.25(12) | C7A  | C6A  | C5A  | 120.3(6)   |
| O3C  | Eu1  | N1B  | 100.31(13) | C6A  | C7A  | C8A  | 120.0(6)   |
| O3C  | Eu1  | O4C  | 50.83(11)  | C7A  | C8A  | C3A  | 120.5(6)   |
| O3C  | Eu1  | N1C  | 25.13(11)  | C10A | C9A  | P1A  | 123.0(3)   |
| O3C  | Eu1  | O3D  | 75.18(13)  | C10A | C9A  | C14A | 120.2(4)   |
| O3C  | Eu1  | O4D  | 94.98(12)  | C14A | C9A  | P1A  | 116.8(3)   |
| O3C  | Eu1  | N1D  | 85.03(13)  | C9A  | C10A | C11A | 120.3(4)   |
| O4C  | Eu1  | N1B  | 100.22(13) | C12A | C11A | C10A | 119.5(4)   |
| O4C  | Eu1  | N1C  | 25.71(11)  | C11A | C12A | C13A | 120.0(4)   |
| O4C  | Eu1  | N1D  | 85.16(13)  | C14A | C13A | C12A | 119.9(5)   |
| N1C  | Eu1  | N1D  | 84.21(12)  | C13A | C14A | C9A  | 120.0(4)   |
| O3D  | Eu1  | N1B  | 153.53(11) | C16A | C15A | P1A  | 118.0(3)   |
| O3D  | Eu1  | O4C  | 96.78(12)  | C20A | C15A | P1A  | 121.6(3)   |

|     |     |     |            |      |      |      |          |
|-----|-----|-----|------------|------|------|------|----------|
| O3D | Eu1 | N1C | 85.18(12)  | C20A | C15A | C16A | 120.3(4) |
| O3D | Eu1 | N1D | 25.68(10)  | C15A | C16A | C17A | 119.2(4) |
| O4D | Eu1 | N1B | 154.44(12) | C18A | C17A | C16A | 119.8(4) |
| O4D | Eu1 | O4C | 73.96(13)  | C19A | C18A | C17A | 120.6(4) |
| O4D | Eu1 | N1C | 83.78(12)  | C18A | C19A | C20A | 120.2(4) |
| O4D | Eu1 | O3D | 50.89(10)  | C19A | C20A | C15A | 119.9(4) |
| O4D | Eu1 | N1D | 25.21(11)  | N1B  | O3B  | Eu1  | 96.1(3)  |
| O1W | Eu1 | O3B | 73.29(10)  | N1B  | O4B  | Eu1  | 96.4(3)  |
| O1W | Eu1 | O4B | 85.66(12)  | O3B  | N1B  | Eu1  | 58.4(2)  |
| O1W | Eu1 | N1B | 79.06(11)  | O3B  | N1B  | O4B  | 116.3(4) |
| O1W | Eu1 | O3C | 72.57(11)  | O4B  | N1B  | Eu1  | 58.0(2)  |
| O1W | Eu1 | O4C | 122.60(11) | O5B  | N1B  | Eu1  | 177.9(4) |
| O1W | Eu1 | N1C | 97.38(11)  | O5B  | N1B  | O3B  | 121.4(5) |
| O1W | Eu1 | O3D | 74.70(10)  | O5B  | N1B  | O4B  | 122.3(4) |
| O1W | Eu1 | O4D | 125.39(11) | N1C  | O3C  | Eu1  | 98.2(2)  |
| O1W | Eu1 | N1D | 100.25(11) | N1C  | O4C  | Eu1  | 96.1(3)  |
| O1  | P1  | C2  | 111.1(2)   | O3C  | N1C  | Eu1  | 56.7(2)  |
| O1  | P1  | C9  | 113.0(2)   | O3C  | N1C  | O4C  | 114.9(4) |
| O1  | P1  | C15 | 109.7(2)   | O4C  | N1C  | Eu1  | 58.2(2)  |
| C9  | P1  | C2  | 108.9(2)   | O5C  | N1C  | Eu1  | 179.2(3) |
| C15 | P1  | C2  | 105.5(2)   | O5C  | N1C  | O3C  | 122.6(4) |
| C15 | P1  | C9  | 108.4(2)   | O5C  | N1C  | O4C  | 122.5(4) |
| P1  | O1  | Eu1 | 156.0(2)   | N1D  | O3D  | Eu1  | 96.9(3)  |
| O2  | C1  | C2  | 118.9(4)   | N1D  | O4D  | Eu1  | 97.5(2)  |
| O2  | C1  | C3  | 120.2(4)   | O3D  | N1D  | Eu1  | 57.5(2)  |
| C3  | C1  | C2  | 120.8(4)   | O4D  | N1D  | Eu1  | 57.2(2)  |
| C1  | C2  | P1  | 109.9(3)   | O4D  | N1D  | O3D  | 114.7(4) |
| C4  | C3  | C1  | 117.7(4)   | O5D  | N1D  | Eu1  | 178.3(4) |
| C8  | C3  | C1  | 123.9(4)   | O5D  | N1D  | O3D  | 122.1(4) |
| C8  | C3  | C4  | 118.3(4)   | O5D  | N1D  | O4D  | 123.2(4) |

Table 6 Hydrogen Bonds for Eu(NO<sub>3</sub>)<sub>3</sub>(4)<sub>2</sub>(H<sub>2</sub>O)

| D   | H    | A                | d(D-H)/Å | d(H-A)/Å | d(D-A)/Å | D-H-A/° |
|-----|------|------------------|----------|----------|----------|---------|
| O1W | H1WA | O3D <sup>1</sup> | 0.90     | 1.90     | 2.748(4) | 156.8   |
| O1W | H1WB | O2               | 0.90     | 1.83     | 2.725(5) | 172.9   |

<sup>1</sup>1-X,2-Y,1-Z

Table 7 Torsion Angles for Eu(NO<sub>3</sub>)<sub>3</sub>(4)<sub>2</sub>(H<sub>2</sub>O).

| A   | B   | C   | D   | Angle/°   | A   | B   | C    | D    | Angle/°   |
|-----|-----|-----|-----|-----------|-----|-----|------|------|-----------|
| Eu1 | O3B | N1B | O4B | -2.8(4)   | C15 | C16 | C17  | C18  | 2.2(7)    |
| Eu1 | O3B | N1B | O5B | 177.5(4)  | C16 | C15 | C20  | C19  | 0.4(7)    |
| Eu1 | O4B | N1B | O3B | 2.8(4)    | C16 | C17 | C18  | C19  | -1.9(8)   |
| Eu1 | O4B | N1B | O5B | -177.5(4) | C17 | C18 | C19  | C20  | 0.7(8)    |
| Eu1 | O3C | N1C | O4C | 1.4(4)    | C18 | C19 | C20  | C15  | 0.0(8)    |
| Eu1 | O3C | N1C | O5C | -179.7(4) | C20 | C15 | C16  | C17  | -1.5(7)   |
| Eu1 | O4C | N1C | O3C | -1.4(4)   | P1A | C9A | C10A | C11A | 177.0(3)  |
| Eu1 | O4C | N1C | O5C | 179.8(4)  | P1A | C9A | C14A | C13A | -178.2(4) |

|     |           |           |     |           |      |      |           |      |           |
|-----|-----------|-----------|-----|-----------|------|------|-----------|------|-----------|
| Eu1 | O3DN1DO4D | 1.3(4)    | P1A | C15A      | C16A | C17A | 179.3(4)  |      |           |
| Eu1 | O3DN1DO5D | -178.1(4) | P1A | C15A      | C20A | C19A | -178.6(4) |      |           |
| Eu1 | O4DN1DO3D | -1.3(4)   | O1A | P1A       | C2A  | C1A  | 140.0(3)  |      |           |
| Eu1 | O4DN1DO5D | 178.1(4)  | O1A | P1A       | C9A  | C10A | 161.8(4)  |      |           |
| P1  | C9        | C10       | C11 | 179.2(5)  | O1A  | P1A  | C9A       | C14A | -20.2(4)  |
| P1  | C9        | C14       | C13 | -178.8(5) | O1A  | P1A  | C15A      | C16A | -18.1(4)  |
| P1  | C15       | C16       | C17 | 170.4(4)  | O1A  | P1A  | C15A      | C20A | 161.2(4)  |
| P1  | C15       | C20       | C19 | -171.7(4) | O2A  | C1A  | C2A       | P1A  | 77.9(5)   |
| O1  | P1        | C2        | C1  | 63.3(4)   | O2A  | C1A  | C3A       | C4A  | -163.3(5) |
| O1  | P1        | C9        | C10 | 131.4(5)  | O2A  | C1A  | C3A       | C8A  | 16.2(6)   |
| O1  | P1        | C9        | C14 | -49.7(5)  | C1A  | C3A  | C4A       | C5A  | 178.9(5)  |
| O1  | P1        | C15       | C16 | 158.7(3)  | C1A  | C3A  | C8A       | C7A  | -179.5(5) |
| O1  | P1        | C15       | C20 | -29.3(4)  | C2A  | P1A  | O1A       | Eu1  | 35.0(7)   |
| O2  | C1        | C2        | P1  | -76.8(5)  | C2A  | P1A  | C9A       | C10A | 41.4(4)   |
| O2  | C1        | C3        | C4  | -3.2(7)   | C2A  | P1A  | C9A       | C14A | -140.6(3) |
| O2  | C1        | C3        | C8  | 174.5(4)  | C2A  | P1A  | C15A      | C16A | 101.3(4)  |
| C1  | C3        | C4        | C5  | 177.9(5)  | C2A  | P1A  | C15A      | C20A | -79.4(4)  |
| C1  | C3        | C8        | C7  | -177.7(5) | C2A  | C1A  | C3A       | C4A  | 18.8(7)   |
| C2  | P1        | O1        | Eu1 | 67.1(5)   | C2A  | C1A  | C3A       | C8A  | -161.7(4) |
| C2  | P1        | C9        | C10 | 7.5(5)    | C3A  | C1A  | C2A       | P1A  | -104.1(4) |
| C2  | P1        | C9        | C14 | -173.6(4) | C3A  | C4A  | C5A       | C6A  | 0.9(10)   |
| C2  | P1        | C15       | C16 | -81.6(4)  | C4A  | C3A  | C8A       | C7A  | 0.0(7)    |
| C2  | P1        | C15       | C20 | 90.5(4)   | C4A  | C5A  | C6A       | C7A  | -0.6(11)  |
| C2  | C1        | C3        | C4  | 178.4(4)  | C5A  | C6A  | C7A       | C8A  | -0.1(10)  |
| C2  | C1        | C3        | C8  | -3.9(7)   | C6A  | C7A  | C8A       | C3A  | 0.4(8)    |
| C3  | C1        | C2        | P1  | 101.6(4)  | C8A  | C3A  | C4A       | C5A  | -0.6(9)   |
| C3  | C4        | C5        | C6  | -0.4(9)   | C9A  | P1A  | O1A       | Eu1  | -85.4(6)  |
| C4  | C3        | C8        | C7  | -0.1(7)   | C9A  | P1A  | C2A       | C1A  | -98.2(4)  |
| C4  | C5        | C6        | C7  | 0.7(10)   | C9A  | P1A  | C15A      | C16A | -140.1(4) |
| C5  | C6        | C7        | C8  | -0.7(9)   | C9A  | P1A  | C15A      | C20A | 39.2(4)   |
| C6  | C7        | C8        | C3  | 0.4(8)    | C9A  | C10A | C11A      | C12A | 2.2(7)    |
| C8  | C3        | C4        | C5  | 0.1(7)    | C10A | C9A  | C14A      | C13A | -0.1(7)   |
| C9  | P1        | O1        | Eu1 | -55.6(5)  | C10A | C11A | C12A      | C13A | -2.5(7)   |
| C9  | P1        | C2        | C1  | -171.7(3) | C11A | C12A | C13A      | C14A | 1.5(8)    |
| C9  | P1        | C15       | C16 | 34.9(4)   | C12A | C13A | C14A      | C9A  | -0.2(7)   |
| C9  | P1        | C15       | C20 | -153.1(3) | C14A | C9A  | C10A      | C11A | -0.9(7)   |
| C9  | C10       | C11       | C12 | 0.0(11)   | C15A | P1A  | O1A       | Eu1  | 154.4(6)  |
| C10 | C9        | C14       | C13 | 0.1(9)    | C15A | P1A  | C2A       | C1A  | 20.0(4)   |
| C10 | C11       | C12       | C13 | -0.9(11)  | C15A | P1A  | C9A       | C10A | -77.1(4)  |
| C11 | C12       | C13       | C14 | 1.4(10)   | C15A | P1A  | C9A       | C14A | 100.8(3)  |
| C12 | C13       | C14       | C9  | -1.1(10)  | C15A | C16A | C17A      | C18A | -1.2(8)   |
| C14 | C9        | C10       | C11 | 0.4(9)    | C16A | C15A | C20A      | C19A | 0.6(7)    |
| C15 | P1        | O1        | Eu1 | -176.6(4) | C16A | C17A | C18A      | C19A | 1.8(8)    |
| C15 | P1        | C2        | C1  | -55.6(4)  | C17A | C18A | C19A      | C20A | -1.2(8)   |
| C15 | P1        | C9        | C10 | -106.8(5) | C18A | C19A | C20A      | C15A | 0.0(7)    |
| C15 | P1        | C9        | C14 | 72.1(4)   | C20A | C15A | C16A      | C17A | 0.0(7)    |

Table 8 Hydrogen Atom Coordinates ( $\text{\AA}\times 10^4$ ) and Isotropic Displacement Parameters ( $\text{\AA}^2\times 10^3$ ) for  $\text{Eu}(\text{NO}_3)_3(4)_2(\text{H}_2\text{O})$ .

| H2A | Atom | x    | y     | z    | U(eq) |
|-----|------|------|-------|------|-------|
|     |      | 5203 | 13794 | 5614 | 34    |

|      |       |       |       |    |
|------|-------|-------|-------|----|
| H2B  | 5291  | 12561 | 5358  | 34 |
| H4   | 884   | 14646 | 5941  | 49 |
| H5   | -454  | 16668 | 6130  | 65 |
| H6   | 429   | 18077 | 6259  | 65 |
| H7   | 2683  | 17484 | 6169  | 56 |
| H8   | 4053  | 15457 | 5979  | 43 |
| H10  | 7493  | 12841 | 5572  | 62 |
| H11  | 9722  | 12299 | 5577  | 81 |
| H12  | 10725 | 10791 | 6612  | 64 |
| H13  | 9466  | 9877  | 7659  | 67 |
| H14  | 7257  | 10398 | 7639  | 56 |
| H16  | 5892  | 13892 | 7192  | 41 |
| H17  | 4567  | 15335 | 7950  | 58 |
| H18  | 2585  | 15196 | 8614  | 68 |
| H19  | 1812  | 13707 | 8482  | 61 |
| H20  | 3074  | 12281 | 7696  | 40 |
| H2AA | 5106  | 5835  | 9162  | 34 |
| H2AB | 6107  | 5617  | 8396  | 34 |
| H4A  | 8081  | 4902  | 7890  | 61 |
| H5A  | 9886  | 3452  | 7315  | 87 |
| H6A  | 10954 | 1426  | 8047  | 83 |
| H7A  | 10252 | 858   | 9355  | 68 |
| H8A  | 8478  | 2308  | 9941  | 51 |
| H10A | 5103  | 6700  | 10366 | 37 |
| H11A | 3626  | 7901  | 11228 | 41 |
| H12A | 2505  | 10084 | 10778 | 46 |
| H13A | 2988  | 11103 | 9487  | 48 |
| H14A | 4503  | 9908  | 8648  | 38 |
| H16A | 8456  | 7505  | 7764  | 40 |
| H17A | 10561 | 7226  | 7940  | 47 |
| H18A | 11041 | 6768  | 9176  | 41 |
| H19A | 9494  | 6468  | 10236 | 39 |
| H20A | 7414  | 6704  | 10074 | 34 |
| H1WA | 3789  | 10142 | 5495  | 44 |
| H1WB | 3296  | 11054 | 5977  | 44 |

## E. $\text{Eu}(\text{NO}_3)_3 \cdot 4\text{H}_2\text{O} \cdot (\text{CHCl}_3)_2$

For this structure, only one orientation of the disordered  $\text{CHCl}_3$  molecule is shown.

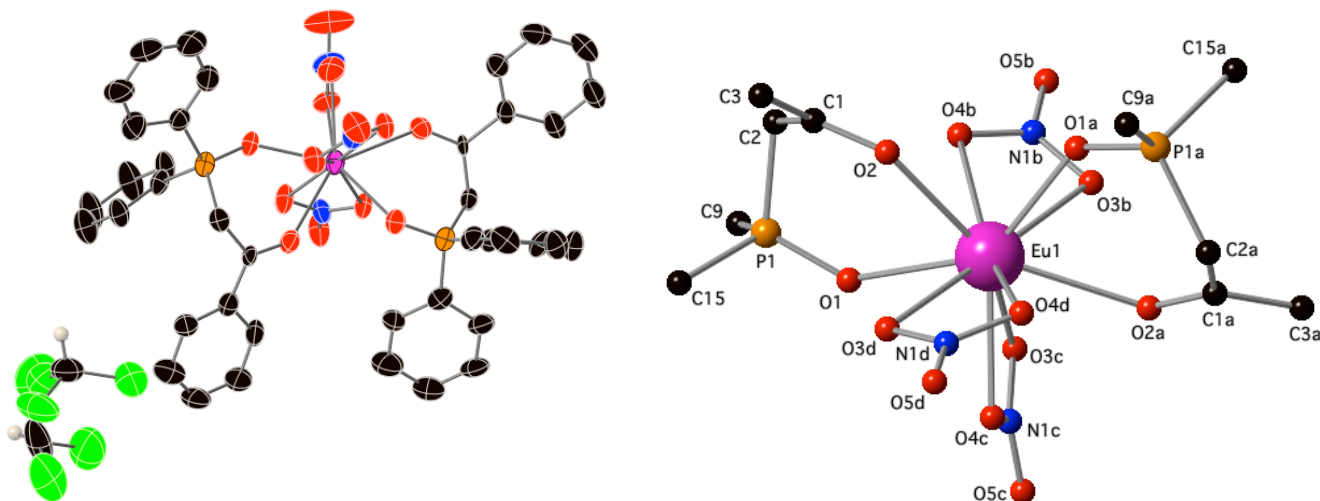

### Experimental

Single crystals of  $\text{C}_{42}\text{H}_{36}\text{Cl}_6\text{EuN}_3\text{O}_{13}\text{P}_2$  were grown at 4 °C from slow diffusion of hexane into a solution of the 3:1  $\text{Eu}(\text{NO}_3)_3 \cdot 4\text{H}_2\text{O}$  complex in chloroform and used as received. A suitable crystal was selected and mounted using a small amount of paratone oil on a nylon loop on a Bruker APEX-II CCD diffractometer. The crystal was kept at 173(2) K during data collection. Using Olex2 [1], the structure was solved with the olex2.solve [2] structure solution program using Charge Flipping and refined with the ShelXL [3] refinement package using Least Squares minimization.

The disordered  $\text{CHCl}_3$  molecule was modeled over two positions with 50% occupancy each. Severely disordered electron density located on a symmetry center with coordinates of [0.000, 0.000, 0.500] and likely corresponding to another  $\text{CHCl}_3$  molecule was removed using the BYPASS [4] instructions as implemented in Olex2. [1] This space has a volume of 147.9 Å<sup>3</sup> and contains 57.7 electrons.

1. Dolomanov, O.V., Bourhis, L.J., Gildea, R.J., Howard, J.A.K. & Puschmann, H. (2009), *J. Appl. Cryst.* 42, 339-341.
2. Bourhis, L.J., Dolomanov, O.V., Gildea, R.J., Howard, J.A.K., Puschmann, H. (2015). *Acta Cryst.* A71, 59-75.
3. Sheldrick, G.M. (2015). *Acta Cryst.* C71, 3-8.
4. van der Sluis, P.; Spek, A. L. (1990). *Acta Cryst.* A46, 194-201.

### Crystal structure determination of $\text{Eu}(\text{NO}_3)_3 \cdot 4\text{H}_2\text{O} \cdot (\text{CHCl}_3)_2$

**Crystal Data** for  $\text{C}_{42}\text{H}_{36}\text{Cl}_6\text{EuN}_3\text{O}_{13}\text{P}_2$  ( $M = 1217.34$  g/mol): triclinic, space group P-1 (no. 2),  $a = 12.5305(12)$  Å,  $b = 14.0929(14)$  Å,  $c = 16.2116(16)$  Å,  $\alpha = 71.5480(10)^\circ$ ,  $\beta = 80.1730(10)^\circ$ ,  $\gamma = 72.0490(10)^\circ$ ,  $V = 2575.0(4)$  Å<sup>3</sup>,  $Z = 2$ ,  $T = 173.15$  K,  $\mu(\text{MoK}\alpha) = 1.652$  mm<sup>-1</sup>,  $D_{\text{calc}} = 1.570$  g/cm<sup>3</sup>, 51489 reflections measured ( $2.658^\circ \leq 2\theta \leq 51.478^\circ$ ), 9820 unique ( $R_{\text{int}} = 0.1507$ ,  $R_{\text{sigma}} = 0.1278$ ) which were used in all calculations. The final  $R_1$  was 0.0730 ( $I > 2\sigma(I)$ ) and  $wR_2$  was 0.1769 (all data).

### Refinement model description

Number of restraints - 39, number of constraints - unknown.

Details:

1. Fixed Uiso

At 1.2 times of:

All C(H) groups, All C(H,H) groups

2. Rigid bond restraints

C11X, C12X, C13X, C1X

with sigma for 1-2 distances of 0.005 and sigma for 1-3 distances of 0.005

C11Y, C12Y, C13Y, C1Y

with sigma for 1-2 distances of 0.005 and sigma for 1-3 distances of 0.005

3. Uiso/Uanisotropic restraints and constraints

C11X  $\approx$  C12X  $\approx$  C13X  $\approx$  C1X: within 1.8Å with sigma of 0.01 and sigma for terminal atoms of 0.02

C11Y  $\approx$  C12Y  $\approx$  C13Y  $\approx$  C1Y: within 1.8Å with sigma of 0.01 and sigma for terminal atoms of 0.02

4. Same fragment restraints

{C11S, C1S} sigma for 1-2: 0.02, 1-3: 0.04

as

{C11X, C1X}

{C11S, C1S} sigma for 1-2: 0.02, 1-3: 0.04

as

{C11Y, C1Y}

5. Others

Fixed Sof: C11X(0.5) C1X(0.5) H1X(0.5) C12X(0.5) C13X(0.5) C11Y(0.5) C1Y(0.5)

H1Y(0.5) C12Y(0.5) C13Y(0.5)

6.a Ternary CH refined with riding coordinates:

C1X(H1X), C1Y(H1Y), C1S(H1S)

6.b Secondary CH2 refined with riding coordinates:

C2(H2A,H2B), C2A(H2AA,H2AB)

6.c Aromatic/amide H refined with riding coordinates:

C4(H4), C5(H5), C6(H6), C7(H7), C8(H8), C10(H10), C11(H11), C12(H12), C13(H13), C14(H14), C16(H16), C17(H17), C18(H18), C19(H19), C20(H20), C4A(H4A), C5A(H5A), C6A(H6A), C7A(H7A), C8A(H8A), C10A(H10A), C11A(H11A), C12A(H12A), C13A(H13A), C14A(H14A), C16A(H16A), C17A(H17A), C18A(H18A), C19A(H19A), C20A(H20A)

Table 1 Crystal data and structure refinement for  $\text{Eu}(\text{NO}_3)_3 \cdot 4\text{H}_2\text{O} \cdot (\text{CHCl}_3)_2$ .

|                                                |                                                                            |
|------------------------------------------------|----------------------------------------------------------------------------|
| Structure number                               | <b>9</b>                                                                   |
| CCDC number                                    | 1484661                                                                    |
| Empirical formula                              | $\text{C}_{42}\text{H}_{36}\text{Cl}_6\text{EuN}_3\text{O}_{13}\text{P}_2$ |
| Formula weight                                 | 1217.34                                                                    |
| Temperature/K                                  | 173(2)                                                                     |
| Crystal system                                 | triclinic                                                                  |
| Space group                                    | P-1                                                                        |
| a/Å                                            | 12.5305(12)                                                                |
| b/Å                                            | 14.0929(14)                                                                |
| c/Å                                            | 16.2116(16)                                                                |
| $\alpha/^\circ$                                | 71.5480(10)                                                                |
| $\beta/^\circ$                                 | 80.1730(10)                                                                |
| $\gamma/^\circ$                                | 72.0490(10)                                                                |
| Volume/Å <sup>3</sup>                          | 2575.0(4)                                                                  |
| Z                                              | 2                                                                          |
| $\rho_{\text{calc}}/\text{g cm}^{-3}$          | 1.570                                                                      |
| $\mu/\text{mm}^{-1}$                           | 1.652                                                                      |
| F(000)                                         | 1216.0                                                                     |
| Crystal size/mm <sup>3</sup>                   | 0.19 × 0.119 × 0.073                                                       |
| Radiation                                      | MoK $\alpha$ ( $\lambda = 0.71073$ )                                       |
| 2 $\theta$ range for data collection/ $^\circ$ | 2.658 to 51.478                                                            |
| Index ranges                                   | -15 $\leq$ h $\leq$ 15, -17 $\leq$ k $\leq$ 17, -19 $\leq$ l $\leq$ 19     |
| Reflections collected                          | 51489                                                                      |
| Independent reflections                        | 9820 [ $R_{\text{int}} = 0.1507$ , $R_{\text{sigma}} = 0.1278$ ]           |
| Data/restraints/parameters                     | 9820/39/640                                                                |
| Goodness-of-fit on $F^2$                       | 1.059                                                                      |
| Final R indexes [ $I \geq 2\sigma(I)$ ]        | $R_1 = 0.0730$ , $wR_2 = 0.1540$                                           |
| Final R indexes [all data]                     | $R_1 = 0.1287$ , $wR_2 = 0.1769$                                           |

Largest diff. peak/hole / e Å<sup>-3</sup> 1.86/-0.92

Table 2 Fractional Atomic Coordinates ( $\times 10^4$ ) and Equivalent Isotropic Displacement Parameters ( $\text{\AA}^2 \times 10^3$ ) for Eu(NO<sub>3</sub>)<sub>3</sub>·4H<sub>2</sub>O·(CHCl<sub>3</sub>)<sub>2</sub>. U<sub>eq</sub> is defined as 1/3 of the trace of the orthogonalised U<sub>ij</sub> tensor.

| Atom | x          | y          | z          | U(eq)     |
|------|------------|------------|------------|-----------|
| Eu1  | 3823.6(4)  | 2844.1(3)  | 7590.0(3)  | 33.14(16) |
| P1   | 3910(2)    | 2162.7(17) | 9916.7(14) | 36.2(6)   |
| O1   | 3378(5)    | 2689(4)    | 9083(3)    | 36.7(14)  |
| O2   | 5621(5)    | 2344(4)    | 8287(4)    | 40.6(14)  |
| O4D  | 4418(5)    | 4415(4)    | 6652(3)    | 37.3(14)  |
| O3D  | 4218(5)    | 4342(4)    | 8000(4)    | 45.8(16)  |
| O5D  | 4597(6)    | 5688(5)    | 7035(4)    | 52.9(18)  |
| O3B  | 3437(5)    | 1313(4)    | 7209(4)    | 39.1(14)  |
| O4B  | 4204(5)    | 927(4)     | 8399(4)    | 43.8(15)  |
| O5B  | 3812(6)    | -269(4)    | 8047(4)    | 55.1(18)  |
| O3C  | 1806(5)    | 2835(5)    | 7856(4)    | 52.1(17)  |
| O4C  | 2149(5)    | 4332(4)    | 7508(4)    | 43.0(15)  |
| O5C  | 429(7)     | 4247(7)    | 7663(7)    | 111(3)    |
| N1D  | 4403(6)    | 4836(5)    | 7231(5)    | 37.3(17)  |
| N1B  | 3801(6)    | 644(5)     | 7882(5)    | 36.0(17)  |
| N1C  | 1439(7)    | 3805(7)    | 7684(6)    | 59(2)     |
| C1   | 5984(7)    | 1972(6)    | 9014(5)    | 33(2)     |
| C2   | 5315(7)    | 1381(6)    | 9734(5)    | 34(2)     |
| C3   | 6948(7)    | 2261(6)    | 9189(5)    | 39(2)     |
| C4   | 7430(8)    | 2961(7)    | 8523(6)    | 45(2)     |
| C5   | 8367(9)    | 3201(9)    | 8637(8)    | 67(3)     |
| C6   | 8842(9)    | 2762(9)    | 9408(8)    | 65(3)     |
| C7   | 8416(9)    | 2055(8)    | 10076(8)   | 64(3)     |
| C8   | 7477(8)    | 1811(7)    | 9958(6)    | 47(2)     |
| C9   | 3120(7)    | 1308(7)    | 10636(6)   | 40(2)     |
| C10  | 2287(8)    | 1134(7)    | 10302(6)   | 51(3)     |
| C11  | 1677(9)    | 466(8)     | 10804(8)   | 63(3)     |
| C12  | 1897(9)    | -11(8)     | 11654(8)   | 64(3)     |
| C13  | 2732(10)   | 124(9)     | 11984(7)   | 76(4)     |
| C14  | 3338(9)    | 813(8)     | 11499(6)   | 61(3)     |
| C15  | 4049(7)    | 3079(6)    | 10412(5)   | 36(2)     |
| C16  | 3453(8)    | 4124(7)    | 10107(6)   | 49(2)     |
| C17  | 3583(10)   | 4815(7)    | 10485(7)   | 70(3)     |
| C18  | 4252(10)   | 4533(8)    | 11141(7)   | 68(3)     |
| C19  | 4831(10)   | 3530(8)    | 11435(7)   | 64(3)     |
| C20  | 4741(8)    | 2787(7)    | 11088(6)   | 45(2)     |
| P1A  | 5632.8(19) | 2628.3(17) | 5640.6(14) | 34.5(5)   |
| O1A  | 5302(5)    | 2251(4)    | 6592(3)    | 36.8(14)  |
| O2A  | 3038(5)    | 3320(4)    | 6126(4)    | 37.9(14)  |
| C1A  | 3413(7)    | 3459(6)    | 5355(5)    | 32.1(19)  |
| C2A  | 4539(6)    | 3672(6)    | 5081(5)    | 31.4(19)  |
| C3A  | 2763(7)    | 3292(6)    | 4751(5)    | 36(2)     |
| C4A  | 1834(8)    | 2906(7)    | 5083(6)    | 46(2)     |
| C5A  | 1231(8)    | 2748(8)    | 4545(8)    | 61(3)     |
| C6A  | 1511(10)   | 2972(10)   | 3658(8)    | 79(4)     |
| C7A  | 2422(10)   | 3350(9)    | 3311(7)    | 75(4)     |
| C8A  | 3036(9)    | 3510(8)    | 3855(6)    | 56(3)     |



|      |           |          |          |           |
|------|-----------|----------|----------|-----------|
| C9A  | 6796(7)   | 3160(6)  | 5464(6)  | 40(2)     |
| C10A | 7295(7)   | 3553(7)  | 4631(6)  | 48(2)     |
| C11A | 8118(7)   | 4022(7)  | 4531(6)  | 52(3)     |
| C12A | 8517(8)   | 4110(8)  | 5232(8)  | 60(3)     |
| C13A | 8034(9)   | 3716(9)  | 6067(8)  | 73(3)     |
| C14A | 7208(8)   | 3240(8)  | 6172(6)  | 50(3)     |
| C15A | 5944(7)   | 1607(6)  | 5139(5)  | 37(2)     |
| C16A | 6130(8)   | 584(7)   | 5666(6)  | 47(2)     |
| C17A | 6384(8)   | -235(7)  | 5313(7)  | 55(3)     |
| C18A | 6486(8)   | -52(8)   | 4412(7)  | 53(3)     |
| C19A | 6289(8)   | 952(8)   | 3883(6)  | 54(3)     |
| C20A | 6023(8)   | 1767(7)  | 4248(6)  | 47(2)     |
| C11X | -614(8)   | 4679(8)  | 647(6)   | 151(3)    |
| C1X  | -600(30)  | 3830(30) | 1678(17) | 106(5)    |
| C12X | 454(12)   | 2676(11) | 1719(9)  | 128(4)    |
| C13X | -1933(13) | 3501(11) | 1926(9)  | 144(4)    |
| C11Y | -980(9)   | 2661(9)  | 2924(7)  | 148(3)    |
| C1Y  | -820(50)  | 3530(40) | 1910(20) | 161(7)    |
| C12Y | -1889(19) | 3619(16) | 1406(12) | 220(7)    |
| C13Y | 580(20)   | 3093(14) | 1420(12) | 220(9)    |
| C11S | 784(3)    | 736(2)   | 8643(2)  | 82.8(9)   |
| C1S  | 1052(10)  | 734(11)  | 7561(7)  | 88(4)     |
| C12S | 1163(3)   | -497(4)  | 7480(3)  | 112.2(13) |
| C13S | 41(3)     | 1686(3)  | 6929(2)  | 124.9(16) |

Table 3 Anisotropic Displacement Parameters ( $\text{\AA}^2 \times 10^3$ ) for  $\text{Eu}(\text{NO}_3)_3 \cdot 4\text{H}_2\text{O} \cdot (\text{CHCl}_3)_2$ . The Anisotropic displacement factor exponent takes the form:  $-2\pi^2 [h^2 a^{*2} U_{11} + 2hka^* b^* U_{12} + \dots]$ .

| Atom | $U_{11}$ | $U_{22}$ | $U_{33}$ | $U_{23}$  | $U_{13}$ | $U_{12}$   |
|------|----------|----------|----------|-----------|----------|------------|
| Eu1  | 46.4(3)  | 30.0(2)  | 25.3(2)  | -6.57(17) | 0.26(18) | -16.45(19) |
| P1   | 46.6(14) | 35.4(13) | 28.1(12) | -10.6(10) | 1.6(10)  | -13.9(11)  |
| O1   | 48(4)    | 37(3)    | 23(3)    | -8(3)     | 3(3)     | -13(3)     |
| O2   | 47(4)    | 48(4)    | 30(3)    | -11(3)    | 5(3)     | -22(3)     |
| O4D  | 58(4)    | 35(3)    | 25(3)    | -10(3)    | 4(3)     | -25(3)     |
| O3D  | 75(5)    | 42(4)    | 25(3)    | -8(3)     | 3(3)     | -27(3)     |
| O5D  | 99(5)    | 38(4)    | 34(4)    | -5(3)     | -7(3)    | -41(4)     |
| O3B  | 58(4)    | 34(3)    | 28(3)    | -5(3)     | -9(3)    | -17(3)     |
| O4B  | 64(4)    | 35(3)    | 40(4)    | -11(3)    | -7(3)    | -24(3)     |
| O5B  | 80(5)    | 26(3)    | 66(5)    | -12(3)    | -19(4)   | -18(3)     |
| O3C  | 62(4)    | 47(4)    | 51(4)    | -8(3)     | 7(3)     | -33(3)     |
| O4C  | 38(4)    | 34(3)    | 55(4)    | -9(3)     | 5(3)     | -16(3)     |
| O5C  | 45(5)    | 89(6)    | 185(10)  | -28(6)    | 10(6)    | -22(5)     |
| N1D  | 50(5)    | 38(4)    | 30(4)    | -11(4)    | -7(3)    | -17(4)     |
| N1B  | 51(5)    | 30(4)    | 33(4)    | -11(3)    | 0(4)     | -20(4)     |
| N1C  | 43(6)    | 58(6)    | 76(6)    | -18(5)    | 10(5)    | -21(5)     |
| C1   | 39(5)    | 52(5)    | 15(4)    | -5(4)     | 5(4)     | -30(4)     |
| C2   | 43(5)    | 25(4)    | 32(5)    | -5(4)     | -9(4)    | -6(4)      |
| C3   | 43(5)    | 39(5)    | 33(5)    | -12(4)    | 0(4)     | -7(4)      |
| C4   | 64(7)    | 54(6)    | 28(5)    | -15(4)    | 5(4)     | -33(5)     |
| C5   | 64(7)    | 95(9)    | 68(8)    | -37(7)    | 8(6)     | -53(7)     |
| C6   | 48(7)    | 89(9)    | 80(8)    | -36(7)    | -1(6)    | -38(6)     |

|      |          |          |          |           |           |           |
|------|----------|----------|----------|-----------|-----------|-----------|
| C7   | 49(7)    | 63(7)    | 86(8)    | -24(6)    | -15(6)    | -13(6)    |
| C8   | 46(6)    | 56(6)    | 44(6)    | -11(5)    | 1(5)      | -27(5)    |
| C9   | 40(5)    | 41(5)    | 37(5)    | -16(4)    | 1(4)      | -7(4)     |
| C10  | 60(7)    | 58(6)    | 42(6)    | -15(5)    | 0(5)      | -26(5)    |
| C11  | 66(7)    | 62(7)    | 72(8)    | -22(6)    | 11(6)     | -41(6)    |
| C12  | 49(7)    | 62(7)    | 74(8)    | -9(6)     | 10(6)     | -24(6)    |
| C13  | 73(8)    | 91(9)    | 47(7)    | 24(6)     | -8(6)     | -39(7)    |
| C14  | 66(7)    | 77(8)    | 41(6)    | -5(5)     | 0(5)      | -34(6)    |
| C15  | 49(5)    | 33(5)    | 32(5)    | -16(4)    | 6(4)      | -14(4)    |
| C16  | 66(7)    | 42(6)    | 39(6)    | -20(4)    | -15(5)    | 1(5)      |
| C17  | 116(10)  | 32(6)    | 67(8)    | -25(5)    | -36(7)    | -2(6)     |
| C18  | 108(10)  | 50(7)    | 59(7)    | -28(6)    | -27(7)    | -17(6)    |
| C19  | 92(9)    | 51(7)    | 54(7)    | -20(5)    | -23(6)    | -13(6)    |
| C20  | 59(6)    | 39(5)    | 43(6)    | -22(4)    | -13(5)    | -4(5)     |
| P1A  | 40.3(13) | 33.0(12) | 28.2(12) | -8.4(10)  | 0.6(10)   | -9.4(10)  |
| O1A  | 47(4)    | 30(3)    | 30(3)    | -6(2)     | -3(3)     | -8(3)     |
| O2A  | 41(4)    | 36(3)    | 38(4)    | -9(3)     | -6(3)     | -13(3)    |
| C1A  | 34(5)    | 49(5)    | 12(4)    | -9(4)     | -6(4)     | -8(4)     |
| C2A  | 44(5)    | 34(5)    | 24(4)    | -11(4)    | 4(4)      | -21(4)    |
| C3A  | 41(5)    | 32(5)    | 28(5)    | -8(4)     | -8(4)     | 1(4)      |
| C4A  | 50(6)    | 56(6)    | 45(6)    | -21(5)    | -1(5)     | -25(5)    |
| C5A  | 36(6)    | 66(7)    | 86(9)    | -32(6)    | -7(6)     | -11(5)    |
| C6A  | 66(8)    | 114(11)  | 66(8)    | -26(8)    | -30(7)    | -23(7)    |
| C7A  | 90(9)    | 107(10)  | 44(7)    | -15(6)    | -18(6)    | -50(8)    |
| C8A  | 65(7)    | 69(7)    | 42(6)    | -16(5)    | -14(5)    | -23(6)    |
| C9A  | 36(5)    | 29(5)    | 45(6)    | -6(4)     | 0(4)      | 1(4)      |
| C10A | 36(5)    | 53(6)    | 47(6)    | -2(5)     | 2(4)      | -16(5)    |
| C11A | 37(6)    | 56(6)    | 49(6)    | 9(5)      | 3(5)      | -21(5)    |
| C12A | 47(6)    | 55(7)    | 78(8)    | -12(6)    | -9(6)     | -19(5)    |
| C13A | 61(7)    | 89(9)    | 89(9)    | -34(7)    | -4(7)     | -38(7)    |
| C14A | 46(6)    | 75(7)    | 43(6)    | -18(5)    | 0(5)      | -37(5)    |
| C15A | 39(5)    | 35(5)    | 32(5)    | -11(4)    | -2(4)     | -4(4)     |
| C16A | 51(6)    | 49(6)    | 39(5)    | -8(5)     | 3(4)      | -19(5)    |
| C17A | 61(7)    | 38(6)    | 71(8)    | -17(5)    | -15(6)    | -14(5)    |
| C18A | 57(7)    | 54(6)    | 57(7)    | -32(5)    | -8(5)     | -9(5)     |
| C19A | 70(7)    | 54(6)    | 38(6)    | -23(5)    | 3(5)      | -12(5)    |
| C20A | 55(6)    | 42(5)    | 44(6)    | -23(5)    | 12(5)     | -9(5)     |
| C11X | 131(7)   | 177(8)   | 99(6)    | -28(5)    | -33(5)    | 26(6)     |
| C1X  | 104(9)   | 113(12)  | 92(9)    | -54(8)    | -71(10)   | 45(7)     |
| C12X | 137(7)   | 98(6)    | 155(10)  | -90(6)    | -51(8)    | 34(6)     |
| C13X | 144(7)   | 110(8)   | 179(11)  | -92(9)    | 11(9)     | 3(6)      |
| C11Y | 157(8)   | 179(9)   | 135(7)   | -65(6)    | -32(6)    | -53(7)    |
| C1Y  | 186(12)  | 143(15)  | 122(12)  | -65(10)   | -42(9)    | 45(13)    |
| C12Y | 281(13)  | 144(10)  | 219(12)  | -88(11)   | -145(12)  | 72(10)    |
| C13Y | 253(11)  | 180(18)  | 153(12)  | -71(11)   | 46(9)     | 35(12)    |
| C11S | 106(3)   | 66.9(19) | 82(2)    | -10.1(16) | -14.2(18) | -40.1(18) |
| C1S  | 56(8)    | 134(12)  | 69(8)    | -2(8)     | -7(6)     | -43(8)    |
| C12S | 87(3)    | 151(4)   | 116(3)   | -80(3)    | 5(2)      | -20(2)    |
| C13S | 101(3)   | 155(4)   | 98(3)    | 51(3)     | -42(2)    | -77(3)    |

Table 4 Bond Lengths for  $\text{Eu}(\text{NO}_3)_3 \cdot 4\text{H}_2\text{O} \cdot (\text{CHCl}_3)_2$ .

| Atom | Atom | Length/Å  | Atom | Atom | Length/Å  |
|------|------|-----------|------|------|-----------|
| Eu1  | O1   | 2.345(5)  | C15  | C16  | 1.400(11) |
| Eu1  | O2   | 2.496(6)  | C15  | C20  | 1.392(12) |
| Eu1  | O4D  | 2.504(5)  | C16  | C17  | 1.364(12) |
| Eu1  | O3D  | 2.605(6)  | C17  | C18  | 1.350(14) |
| Eu1  | O3B  | 2.620(5)  | C18  | C19  | 1.346(13) |
| Eu1  | O4B  | 2.535(5)  | C19  | C20  | 1.376(12) |
| Eu1  | O3C  | 2.494(6)  | P1A  | O1A  | 1.493(5)  |
| Eu1  | O4C  | 2.454(6)  | P1A  | C2A  | 1.789(8)  |
| Eu1  | N1D  | 2.970(7)  | P1A  | C9A  | 1.778(9)  |
| Eu1  | N1C  | 2.875(9)  | P1A  | C15A | 1.781(8)  |
| Eu1  | O1A  | 2.372(5)  | O2A  | C1A  | 1.234(9)  |
| Eu1  | O2A  | 2.536(6)  | C1A  | C2A  | 1.497(11) |
| P1   | O1   | 1.480(6)  | C1A  | C3A  | 1.489(11) |
| P1   | C2   | 1.798(8)  | C3A  | C4A  | 1.390(11) |
| P1   | C9   | 1.801(9)  | C3A  | C8A  | 1.391(12) |
| P1   | C15  | 1.785(8)  | C4A  | C5A  | 1.355(13) |
| O2   | C1   | 1.231(9)  | C5A  | C6A  | 1.378(15) |
| O4D  | N1D  | 1.255(8)  | C6A  | C7A  | 1.367(15) |
| O3D  | N1D  | 1.241(8)  | C7A  | C8A  | 1.373(13) |
| O5D  | N1D  | 1.231(8)  | C9A  | C10A | 1.404(11) |
| O3B  | N1B  | 1.241(8)  | C9A  | C14A | 1.385(12) |
| O4B  | N1B  | 1.263(8)  | C10A | C11A | 1.350(12) |
| O5B  | N1B  | 1.225(8)  | C11A | C12A | 1.369(13) |
| O3C  | N1C  | 1.254(9)  | C12A | C13A | 1.399(15) |
| O4C  | N1C  | 1.270(9)  | C13A | C14A | 1.359(12) |
| O5C  | N1C  | 1.228(10) | C15A | C16A | 1.394(11) |
| C1   | C2   | 1.498(10) | C15A | C20A | 1.380(11) |
| C1   | C3   | 1.482(11) | C16A | C17A | 1.377(12) |
| C3   | C4   | 1.404(11) | C17A | C18A | 1.390(13) |
| C3   | C8   | 1.386(12) | C18A | C19A | 1.373(13) |
| C4   | C5   | 1.373(13) | C19A | C20A | 1.382(12) |
| C5   | C6   | 1.355(15) | Cl1X | C1X  | 1.72(2)   |
| C6   | C7   | 1.377(14) | C1X  | Cl2X | 1.74(4)   |
| C7   | C8   | 1.381(12) | C1X  | Cl3X | 1.82(4)   |
| C9   | C10  | 1.370(12) | Cl1Y | C1Y  | 1.73(2)   |
| C9   | C14  | 1.383(12) | C1Y  | Cl2Y | 1.64(7)   |
| C10  | C11  | 1.372(12) | C1Y  | Cl3Y | 1.81(6)   |
| C11  | C12  | 1.362(14) | Cl1S | C1S  | 1.729(12) |
| C12  | C13  | 1.340(14) | C1S  | Cl2S | 1.743(14) |
| C13  | C14  | 1.381(13) | C1S  | Cl3S | 1.726(12) |

Table 5 Bond Angles for  $\text{Eu}(\text{NO}_3)_3 \cdot 4\text{H}_2\text{O} \cdot (\text{CHCl}_3)_2$ .

| Atom | Atom | Atom | Angle/°    | Atom | Atom | Atom | Angle/°  |
|------|------|------|------------|------|------|------|----------|
| O1   | Eu1  | O2   | 72.03(18)  | O3B  | N1B  | Eu1  | 60.7(4)  |
| O1   | Eu1  | O4D  | 118.02(18) | O3B  | N1B  | O4B  | 117.6(6) |
| O1   | Eu1  | O3D  | 69.02(17)  | O4B  | N1B  | Eu1  | 56.9(4)  |
| O1   | Eu1  | O3B  | 110.00(18) | O5B  | N1B  | Eu1  | 176.4(6) |
| O1   | Eu1  | O4B  | 71.94(18)  | O5B  | N1B  | O3B  | 122.8(7) |

|     |     |     |            |      |     |      |           |
|-----|-----|-----|------------|------|-----|------|-----------|
| O1  | Eu1 | O3C | 75.1(2)    | O5B  | N1B | O4B  | 119.6(7)  |
| O1  | Eu1 | O4C | 80.65(19)  | O3C  | N1C | Eu1  | 59.9(4)   |
| O1  | Eu1 | N1D | 93.38(19)  | O3C  | N1C | O4C  | 118.0(8)  |
| O1  | Eu1 | N1C | 77.2(2)    | O4C  | N1C | Eu1  | 58.2(4)   |
| O1  | Eu1 | O1A | 141.61(19) | O5C  | N1C | Eu1  | 175.5(8)  |
| O1  | Eu1 | O2A | 145.35(19) | O5C  | N1C | O3C  | 122.0(8)  |
| O2  | Eu1 | O4D | 85.75(18)  | O5C  | N1C | O4C  | 120.0(9)  |
| O2  | Eu1 | O3D | 65.55(19)  | O2   | C1  | C2   | 118.0(7)  |
| O2  | Eu1 | O3B | 113.69(18) | O2   | C1  | C3   | 119.6(7)  |
| O2  | Eu1 | O4B | 73.31(19)  | C3   | C1  | C2   | 121.6(7)  |
| O2  | Eu1 | N1D | 75.62(19)  | C1   | C2  | P1   | 112.0(6)  |
| O2  | Eu1 | N1C | 146.6(2)   | C4   | C3  | C1   | 119.5(8)  |
| O2  | Eu1 | O2A | 142.53(18) | C8   | C3  | C1   | 123.6(8)  |
| O4D | Eu1 | O3D | 49.22(17)  | C8   | C3  | C4   | 116.7(8)  |
| O4D | Eu1 | O3B | 131.81(17) | C5   | C4  | C3   | 121.5(9)  |
| O4D | Eu1 | O4B | 153.02(19) | C6   | C5  | C4   | 119.9(10) |
| O4D | Eu1 | N1D | 24.66(16)  | C5   | C6  | C7   | 120.9(10) |
| O4D | Eu1 | N1C | 97.5(2)    | C6   | C7  | C8   | 119.1(10) |
| O4D | Eu1 | O2A | 73.41(17)  | C7   | C8  | C3   | 121.8(9)  |
| O3D | Eu1 | O3B | 178.85(18) | C10  | C9  | P1   | 118.0(7)  |
| O3D | Eu1 | N1D | 24.63(16)  | C10  | C9  | C14  | 119.5(9)  |
| O3D | Eu1 | N1C | 91.5(2)    | C14  | C9  | P1   | 122.5(7)  |
| O3B | Eu1 | N1D | 156.43(18) | C9   | C10 | C11  | 121.2(10) |
| O3B | Eu1 | N1C | 88.8(2)    | C12  | C11 | C10  | 118.6(10) |
| O4B | Eu1 | O3D | 129.80(19) | C13  | C12 | C11  | 121.0(10) |
| O4B | Eu1 | O3B | 49.07(18)  | C12  | C13 | C14  | 121.3(10) |
| O4B | Eu1 | N1D | 148.44(19) | C13  | C14 | C9   | 118.2(10) |
| O4B | Eu1 | N1C | 109.4(2)   | C16  | C15 | P1   | 119.0(7)  |
| O4B | Eu1 | O2A | 113.69(18) | C20  | C15 | P1   | 122.0(7)  |
| O3C | Eu1 | O2  | 144.66(19) | C20  | C15 | C16  | 119.0(8)  |
| O3C | Eu1 | O4D | 121.6(2)   | C17  | C16 | C15  | 118.2(9)  |
| O3C | Eu1 | O3D | 113.6(2)   | C18  | C17 | C16  | 122.9(10) |
| O3C | Eu1 | O3B | 66.4(2)    | C19  | C18 | C17  | 119.3(10) |
| O3C | Eu1 | O4B | 84.6(2)    | C18  | C19 | C20  | 121.2(10) |
| O3C | Eu1 | N1D | 119.3(2)   | C19  | C20 | C15  | 119.5(9)  |
| O3C | Eu1 | N1C | 25.79(19)  | O1A  | P1A | Eu1  | 27.2(2)   |
| O3C | Eu1 | O2A | 71.66(19)  | O1A  | P1A | C2A  | 112.0(3)  |
| O4C | Eu1 | O2  | 132.22(19) | O1A  | P1A | C9A  | 111.2(4)  |
| O4C | Eu1 | O4D | 73.37(18)  | O1A  | P1A | C15A | 110.6(4)  |
| O4C | Eu1 | O3D | 68.34(19)  | C2A  | P1A | Eu1  | 85.3(3)   |
| O4C | Eu1 | O3B | 112.21(19) | C9A  | P1A | Eu1  | 115.5(3)  |
| O4C | Eu1 | O4B | 133.49(18) | C9A  | P1A | C2A  | 104.5(4)  |
| O4C | Eu1 | O3C | 51.8(2)    | C9A  | P1A | C15A | 110.7(4)  |
| O4C | Eu1 | N1D | 67.56(19)  | C15A | P1A | Eu1  | 126.8(3)  |
| O4C | Eu1 | N1C | 26.1(2)    | C15A | P1A | C2A  | 107.6(4)  |
| O4C | Eu1 | O2A | 71.38(19)  | P1A  | O1A | Eu1  | 136.0(3)  |
| N1C | Eu1 | N1D | 93.6(2)    | C1A  | O2A | Eu1  | 136.7(5)  |
| O1A | Eu1 | O2  | 72.86(18)  | O2A  | C1A | C2A  | 120.0(7)  |
| O1A | Eu1 | O4D | 73.93(18)  | O2A  | C1A | C3A  | 117.2(7)  |
| O1A | Eu1 | O3D | 109.18(18) | C3A  | C1A | C2A  | 122.4(7)  |
| O1A | Eu1 | O3B | 71.19(18)  | C1A  | C2A | P1A  | 111.5(5)  |
| O1A | Eu1 | O4B | 83.58(18)  | C4A  | C3A | C1A  | 119.4(7)  |

|     |     |     |            |      |      |      |           |
|-----|-----|-----|------------|------|------|------|-----------|
| O1A | Eu1 | O3C | 132.5(2)   | C4A  | C3A  | C8A  | 117.5(8)  |
| O1A | Eu1 | O4C | 135.98(18) | C8A  | C3A  | C1A  | 123.0(8)  |
| O1A | Eu1 | N1D | 92.55(19)  | C5A  | C4A  | C3A  | 120.4(9)  |
| O1A | Eu1 | N1C | 140.1(2)   | C4A  | C5A  | C6A  | 121.2(10) |
| O1A | Eu1 | O2A | 71.60(18)  | C7A  | C6A  | C5A  | 119.7(10) |
| O2A | Eu1 | O3D | 116.42(17) | C6A  | C7A  | C8A  | 119.2(10) |
| O2A | Eu1 | O3B | 64.72(17)  | C7A  | C8A  | C3A  | 121.9(10) |
| O2A | Eu1 | N1D | 94.41(18)  | C10A | C9A  | P1A  | 123.3(7)  |
| O2A | Eu1 | N1C | 68.6(2)    | C14A | C9A  | P1A  | 119.2(6)  |
| O1  | P1  | Eu1 | 25.2(2)    | C14A | C9A  | C10A | 117.5(8)  |
| O1  | P1  | C2  | 110.6(3)   | C11A | C10A | C9A  | 120.7(9)  |
| O1  | P1  | C9  | 109.8(4)   | C10A | C11A | C12A | 121.7(9)  |
| O1  | P1  | C15 | 111.4(4)   | C11A | C12A | C13A | 118.3(9)  |
| C2  | P1  | Eu1 | 85.4(3)    | C14A | C13A | C12A | 120.2(11) |
| C2  | P1  | C9  | 107.5(4)   | C13A | C14A | C9A  | 121.5(9)  |
| C9  | P1  | Eu1 | 120.6(3)   | C16A | C15A | P1A  | 118.9(7)  |
| C15 | P1  | Eu1 | 120.1(3)   | C20A | C15A | P1A  | 123.6(7)  |
| C15 | P1  | C2  | 105.9(4)   | C20A | C15A | C16A | 117.5(8)  |
| C15 | P1  | C9  | 111.5(4)   | C17A | C16A | C15A | 121.3(9)  |
| P1  | O1  | Eu1 | 139.2(3)   | C16A | C17A | C18A | 119.9(9)  |
| C1  | O2  | Eu1 | 140.0(5)   | C19A | C18A | C17A | 119.6(9)  |
| N1D | O4D | Eu1 | 99.0(4)    | C18A | C19A | C20A | 119.8(9)  |
| N1D | O3D | Eu1 | 94.4(4)    | C15A | C20A | C19A | 121.9(9)  |
| N1B | O3B | Eu1 | 94.9(4)    | C11X | C1X  | C12X | 111(2)    |
| N1B | O4B | Eu1 | 98.4(4)    | C11X | C1X  | C13X | 107.3(19) |
| N1C | O3C | Eu1 | 94.3(5)    | C12X | C1X  | C13X | 107(2)    |
| N1C | O4C | Eu1 | 95.8(5)    | C11Y | C1Y  | C13Y | 109(3)    |
| O4D | N1D | Eu1 | 56.4(3)    | C12Y | C1Y  | C11Y | 104(3)    |
| O3D | N1D | Eu1 | 61.0(4)    | C12Y | C1Y  | C13Y | 118(3)    |
| O3D | N1D | O4D | 117.1(6)   | C11S | C1S  | C12S | 109.7(7)  |
| O5D | N1D | Eu1 | 175.6(6)   | C13S | C1S  | C11S | 111.3(8)  |
| O5D | N1D | O4D | 120.5(7)   | C13S | C1S  | C12S | 111.9(7)  |
| O5D | N1D | O3D | 122.4(7)   |      |      |      |           |

Table 6 Torsion Angles for  $\text{Eu}(\text{NO}_3)_3 \cdot 4\text{H}_2\text{O} \cdot (\text{CHCl}_3)_2$ .

| A   | B   | C   | D   | Angle/°   | A   | B   | C    | D    | Angle/°  |
|-----|-----|-----|-----|-----------|-----|-----|------|------|----------|
| Eu1 | P1  | C2  | C1  | 48.5(5)   | C11 | C12 | C13  | C14  | 5.3(19)  |
| Eu1 | P1  | C9  | C10 | -15.8(8)  | C12 | C13 | C14  | C9   | -4.7(18) |
| Eu1 | P1  | C9  | C14 | 163.0(7)  | C14 | C9  | C10  | C11  | -1.0(14) |
| Eu1 | P1  | C15 | C16 | 40.4(8)   | C15 | P1  | O1   | Eu1  | 115.7(5) |
| Eu1 | P1  | C15 | C20 | -139.0(6) | C15 | P1  | C2   | C1   | -71.6(6) |
| Eu1 | O2  | C1  | C2  | 19.7(13)  | C15 | P1  | C9   | C10  | 133.6(7) |
| Eu1 | O2  | C1  | C3  | -150.3(6) | C15 | P1  | C9   | C14  | -47.7(9) |
| Eu1 | O4D | N1D | O3D | 5.7(7)    | C15 | C16 | C17  | C18  | -0.5(17) |
| Eu1 | O4D | N1D | O5D | -176.3(7) | C16 | C15 | C20  | C19  | -0.5(13) |
| Eu1 | O3D | N1D | O4D | -5.4(7)   | C16 | C17 | C18  | C19  | 0.8(19)  |
| Eu1 | O3D | N1D | O5D | 176.7(7)  | C17 | C18 | C19  | C20  | -1.0(18) |
| Eu1 | O3B | N1B | O4B | -2.5(7)   | C18 | C19 | C20  | C15  | 0.8(16)  |
| Eu1 | O3B | N1B | O5B | 179.5(7)  | C20 | C15 | C16  | C17  | 0.3(14)  |
| Eu1 | O4B | N1B | O3B | 2.6(7)    | P1A | C9A | C10A | C11A | 174.7(7) |

Eu1 O4B N1B O5B -179.4(6) P1A C9A C14A C13A -174.6(8)  
 Eu1 O3C N1C O4C -3.0(8) P1A C15A C16A C17A -179.3(7)  
 Eu1 O3C N1C O5C 175.3(10) P1A C15A C20A C19A 178.6(7)  
 Eu1 O4C N1C O3C 3.1(9) O1A P1A C2A C1A -44.1(6)  
 Eu1 O4C N1C O5C -175.3(9) O1A P1A C9A C10A 178.7(7)  
 Eu1 P1A C2A C1A -49.6(5) O1A P1A C9A C14A -4.4(8)  
 Eu1 P1A C9A C10A -151.9(6) O1A P1A C15A C16A -15.9(8)  
 Eu1 P1A C9A C14A 25.0(8) O1A P1A C15A C20A 164.7(7)  
 Eu1 P1A C15A C16A -41.1(8) O2A C1A C2A P1A 59.8(9)  
 Eu1 P1A C15A C20A 139.6(7) O2A C1A C3A C4A -5.6(12)  
 Eu1 O2A C1A C2A -19.1(12) O2A C1A C3A C8A 174.1(8)  
 Eu1 O2A C1A C3A 154.6(5) C1A C3A C4A C5A -180.0(8)  
 P1 C9 C10 C11 177.8(8) C1A C3A C8A C7A -179.9(9)  
 P1 C9 C14 C13 -176.2(8) C2A P1A O1A Eu1 -11.9(6)  
 P1 C15 C16 C17 -179.0(8) C2A P1A C9A C10A -60.2(8)  
 P1 C15 C20 C19 178.9(8) C2A P1A C9A C14A 116.7(7)  
 O1 P1 C2 C1 49.2(7) C2A P1A C15A C16A -138.6(7)  
 O1 P1 C9 C10 9.5(8) C2A P1A C15A C20A 42.1(9)  
 O1 P1 C9 C14 -171.8(8) C2A C1A C3A C4A 167.9(8)  
 O1 P1 C15 C16 14.1(8) C2A C1A C3A C8A -12.4(13)  
 O1 P1 C15 C20 -165.3(7) C3A C1A C2A P1A -113.5(7)  
 O2 C1 C2 P1 -58.4(9) C3A C4A C5A C6A -0.6(15)  
 O2 C1 C3 C4 0.4(13) C4A C3A C8A C7A -0.2(14)  
 O2 C1 C3 C8 -173.9(8) C4A C5A C6A C7A 0.7(18)  
 C1 C3 C4 C5 -175.9(9) C5A C6A C7A C8A -0.6(19)  
 C1 C3 C8 C7 176.0(9) C6A C7A C8A C3A 0.3(18)  
 C2 P1 O1 Eu1 -1.8(6) C8A C3A C4A C5A 0.3(13)  
 C2 P1 C9 C10 -110.8(7) C9A P1A O1A Eu1 104.6(5)  
 C2 P1 C9 C14 67.9(9) C9A P1A C2A C1A -164.7(6)  
 C2 P1 C15 C16 134.4(7) C9A P1A C15A C16A 107.8(7)  
 C2 P1 C15 C20 -45.0(8) C9A P1A C15A C20A -71.5(9)  
 C2 C1 C3 C4 -169.3(8) C9A C10A C11A C12A 1.7(15)  
 C2 C1 C3 C8 16.4(13) C10A C9A C14A C13A 2.5(14)  
 C3 C1 C2 P1 111.4(8) C10A C11A C12A C13A -1.3(15)  
 C3 C4 C5 C6 -0.3(16) C11A C12A C13A C14A 1.5(17)  
 C4 C3 C8 C7 1.5(14) C12A C13A C14A C9A -2.2(17)  
 C4 C5 C6 C7 1.6(17) C14A C9A C10A C11A -2.3(13)  
 C5 C6 C7 C8 -1.3(17) C15A P1A O1A Eu1 -132.0(5)  
 C6 C7 C8 C3 -0.4(15) C15A P1A C2A C1A 77.6(6)  
 C8 C3 C4 C5 -1.2(13) C15A P1A C9A C10A 55.3(8)  
 C9 P1 O1 Eu1 -120.2(5) C15A P1A C9A C14A -127.7(7)  
 C9 P1 C2 C1 169.1(6) C15A C16A C17A C18A 1.6(14)  
 C9 P1 C15 C16 -109.0(7) C16A C15A C20A C19A -0.7(14)  
 C9 P1 C15 C20 71.6(8) C16A C17A C18A C19A -2.5(15)  
 C9 C10 C11 C12 1.4(16) C17A C18A C19A C20A 1.8(15)  
 C10 C9 C14 C13 2.5(15) C18A C19A C20A C15A -0.2(15)  
 C10 C11 C12 C13 -3.5(17) C20A C15A C16A C17A 0.1(13)

Table 7 Hydrogen Atom Coordinates ( $\text{\AA} \times 10^4$ ) and Isotropic Displacement Parameters ( $\text{\AA}^2 \times 10^3$ ) for  $\text{Eu}(\text{NO}_3)_3 \cdot 4\text{H}_2\text{O} \cdot (\text{CHCl}_3)_2$

| Atom | x    | y    | z     | U(eq) |
|------|------|------|-------|-------|
| H2A  | 5700 | 1134 | 10278 | 41    |
| H2B  | 5277 | 763  | 9586  | 41    |
| H4   | 7100 | 3276 | 7982  | 54    |
| H5   | 8681 | 3673 | 8177  | 80    |
| H6   | 9479 | 2944 | 9489  | 78    |
| H7   | 8763 | 1740 | 10610 | 77    |
| H8   | 7186 | 1320 | 10418 | 57    |
| H10  | 2130 | 1483 | 9712  | 61    |
| H11  | 1112 | 338  | 10564 | 75    |
| H12  | 1452 | -445 | 12017 | 77    |
| H13  | 2910 | -262 | 12564 | 92    |
| H14  | 3891 | 944  | 11751 | 73    |
| H16  | 2972 | 4346 | 9649  | 59    |
| H17  | 3186 | 5527 | 10277 | 84    |
| H18  | 4313 | 5036 | 11392 | 81    |
| H19  | 5311 | 3331 | 11890 | 76    |
| H20  | 5147 | 2081 | 11307 | 55    |
| H2AA | 4522 | 4322 | 5204  | 38    |
| H2AB | 4703 | 3773 | 4444  | 38    |
| H4A  | 1622 | 2752 | 5692  | 56    |
| H5A  | 602  | 2477 | 4784  | 73    |
| H6A  | 1073 | 2864 | 3289  | 95    |
| H7A  | 2626 | 3501 | 2701  | 90    |
| H8A  | 3666 | 3776 | 3612  | 67    |
| H10A | 7051 | 3489 | 4133  | 58    |
| H11A | 8429 | 4299 | 3960  | 63    |
| H12A | 9107 | 4429 | 5154  | 72    |
| H13A | 8283 | 3783 | 6562  | 88    |
| H14A | 6906 | 2955 | 6744  | 60    |
| H16A | 6080 | 451  | 6282  | 56    |
| H17A | 6490 | -926 | 5684  | 66    |
| H18A | 6690 | -617 | 4165  | 64    |
| H19A | 6336 | 1085 | 3268  | 64    |
| H20A | 5891 | 2458 | 3875  | 57    |
| H1X  | -495 | 4155 | 2113  | 127   |
| H1Y  | -909 | 4223 | 2001  | 193   |
| H1S  | 1794 | 889  | 7344  | 106   |

Table 8 Atomic Occupancy for  $\text{Eu}(\text{NO}_3)_3 \cdot 4\text{H}_2\text{O} \cdot (\text{CHCl}_3)_2$ .

| Atom | Occupancy | Atom | Occupancy | Atom | Occupancy |
|------|-----------|------|-----------|------|-----------|
| Cl1X | 0.5       | C1X  | 0.5       | H1X  | 0.5       |
| Cl2X | 0.5       | Cl3X | 0.5       | Cl1Y | 0.5       |
| C1Y  | 0.5       | H1Y  | 0.5       | Cl2Y | 0.5       |
| Cl3Y | 0.5       |      |           |      |           |

Table 9 Solvent masks information for  $\text{Eu}(\text{NO}_3)_3 \cdot 4\text{H}_2\text{O} \cdot (\text{CHCl}_3)_2$ .

| Number | X     | Y     | Z     | Volume | Electron count |
|--------|-------|-------|-------|--------|----------------|
| 1      | 0.000 | 0.000 | 0.500 | 147.9  | 57.7           |
| 2      | 0.428 | 0.153 | 0.288 | 9.2    | 0.0            |
| 3      | 0.572 | 0.847 | 0.712 | 9.2    | 0.0            |

## II. Luminescence studies

**A. Lifetime decay curves and fitting residuals.** All lifetimes were measured in CH<sub>3</sub>CN with a complex concentration of 2.0 mM and three equivalents of ligand relative to the metal. For all sets of data below, the blue curve is connected data points and the red curve is the fit. All complexes were excited at 350 nm. Please note for each of the residual plots, the units of the x-axis are time (ms), while the units of the y-axis are intensity (counts).

### 1. Lifetime decay curves of Tb(NO<sub>3</sub>)<sub>3</sub> complex, monitored at 545 nm.

**Trial 1 settings:** sample window: 15.00 ms; max delay: 20 ms; averages: 50; slit widths: 0.50 nm both excitation and emission; number of data points: 1996.

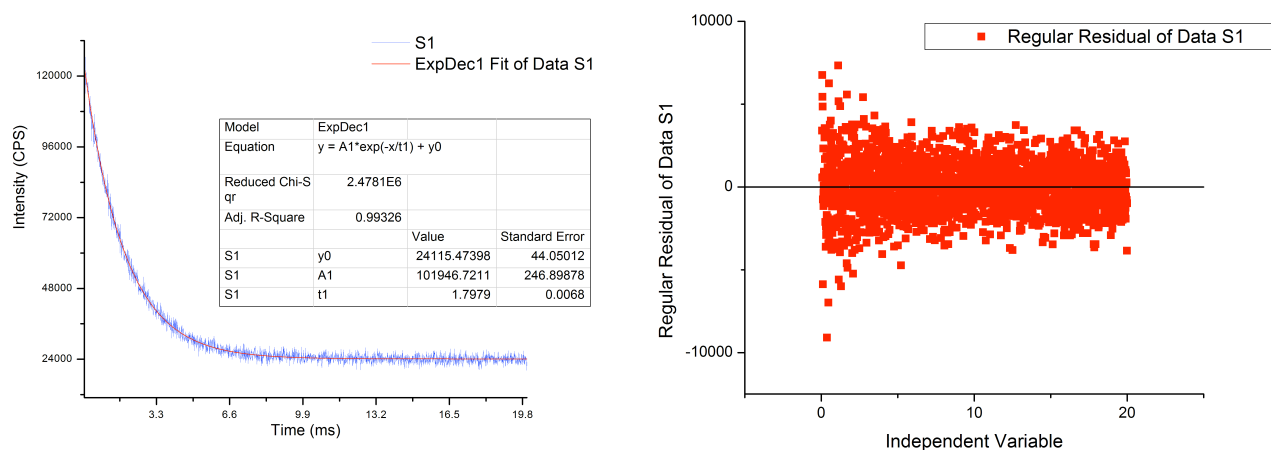

**Trial 2 settings:** sample window: 1.80 ms; max delay: 12 ms; averages: 100; slit widths: 1.00 nm both excitation and emission; number of data points: 240.

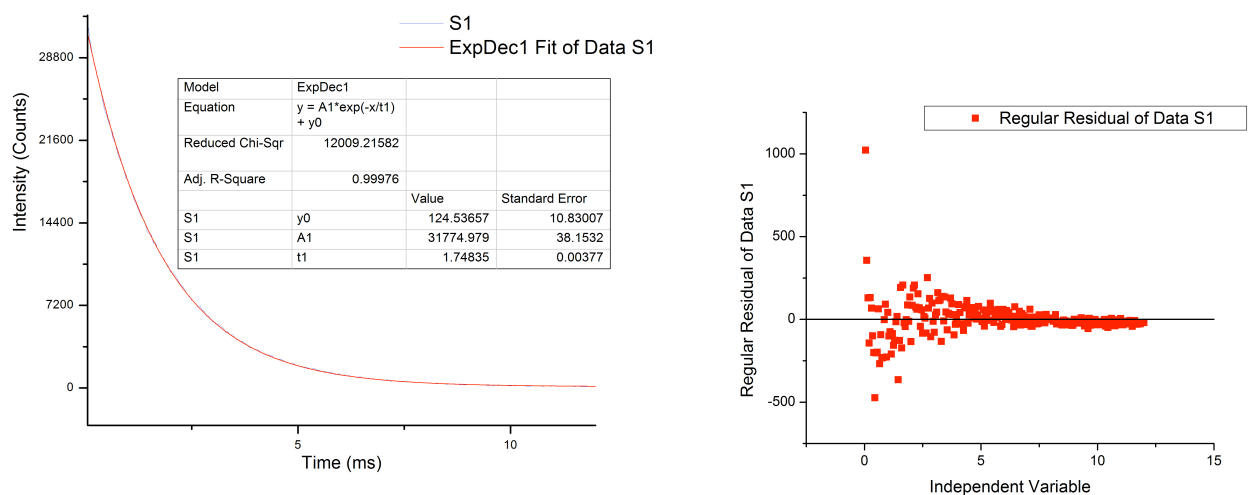



**Trial 3 settings:** sample window: 1.80 ms; max delay: 12 ms; averages: 100; slit widths: 1.00 nm both excitation and emission; number of data points: 240.

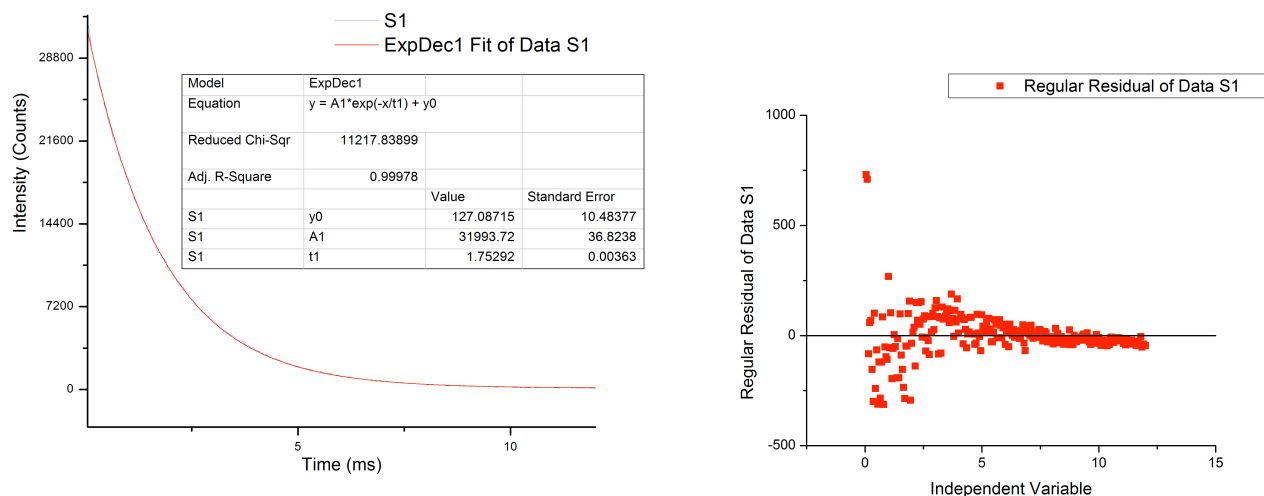

## 2. Lifetime decay curves of $\text{Eu}(\text{NO}_3)_3$ complex, monitored at 620 nm.

**Trial 1 settings:** sample window: 10.00 ms; max delay: 15 ms; averages: 50; slit widths: 1.00 nm both excitation and emission; number of data points: 1496.

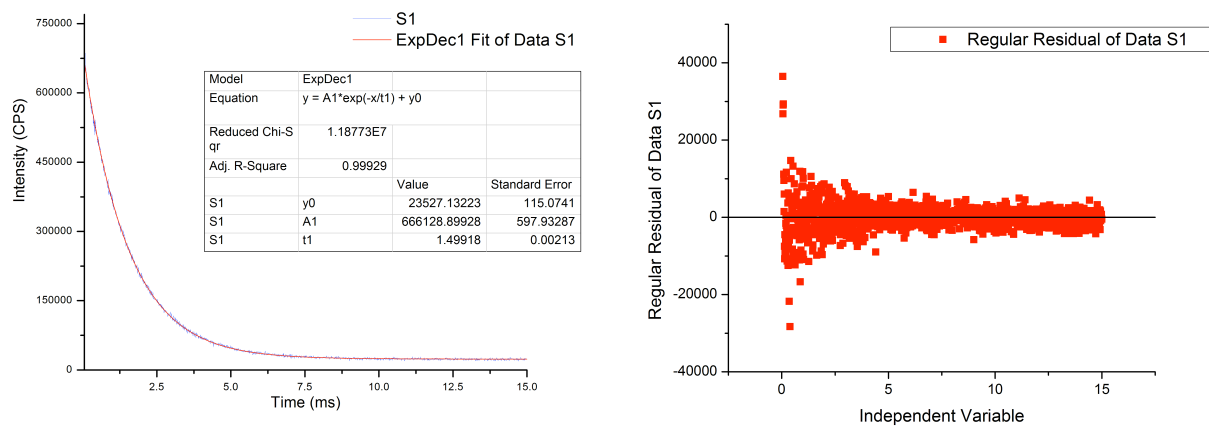

**Trial 2 settings:** sample window: 1.50 ms; max delay: 12 ms; averages: 100; slit widths: 1.00 nm both excitation and emission; number of data points: 240.

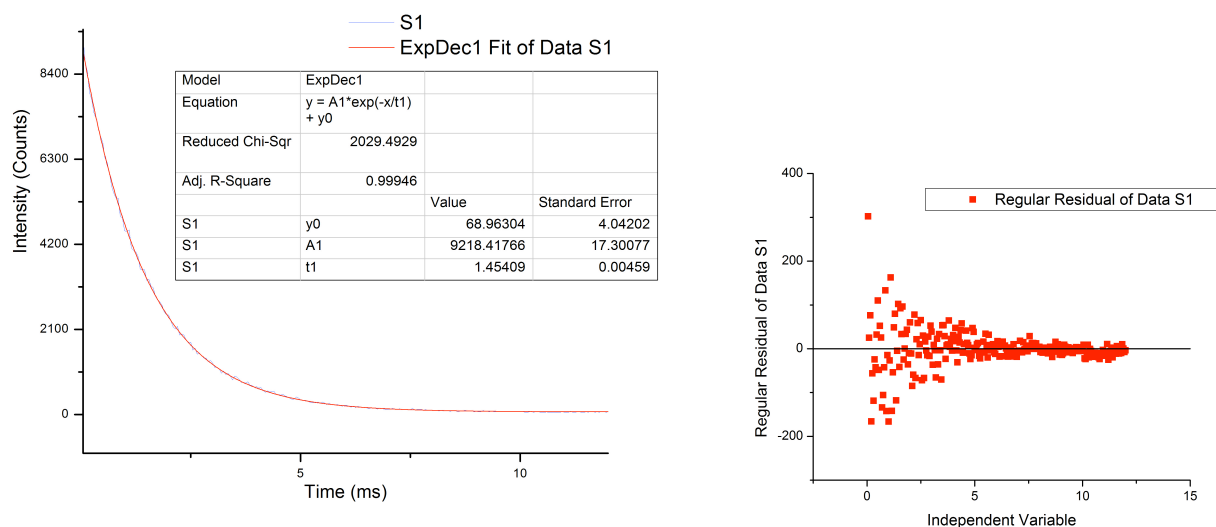

**Trial 3 settings:** sample window: 1.50 ms; max delay: 12 ms; averages: 100; slit widths: 1.00 nm both excitation and emission; number of data points: 240.

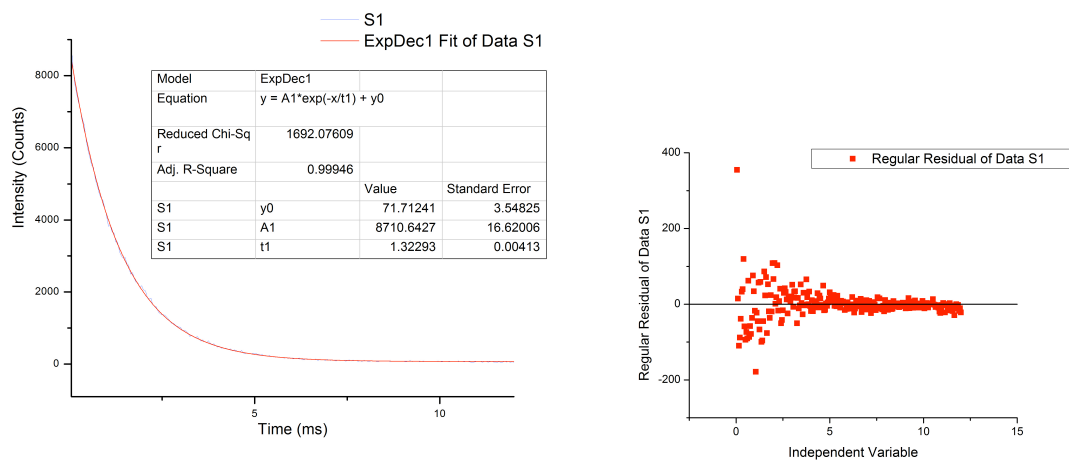

### 3. Lifetime decay curve of Dy(NO<sub>3</sub>)<sub>3</sub> complex in CH<sub>3</sub>CN, monitored at 580 nm.

**Trial 1 settings:** sample window: 4.00 ms; averages: 50; max delay: 5; slit widths: 2.00 nm both emission and excitation; number of data points: 496.

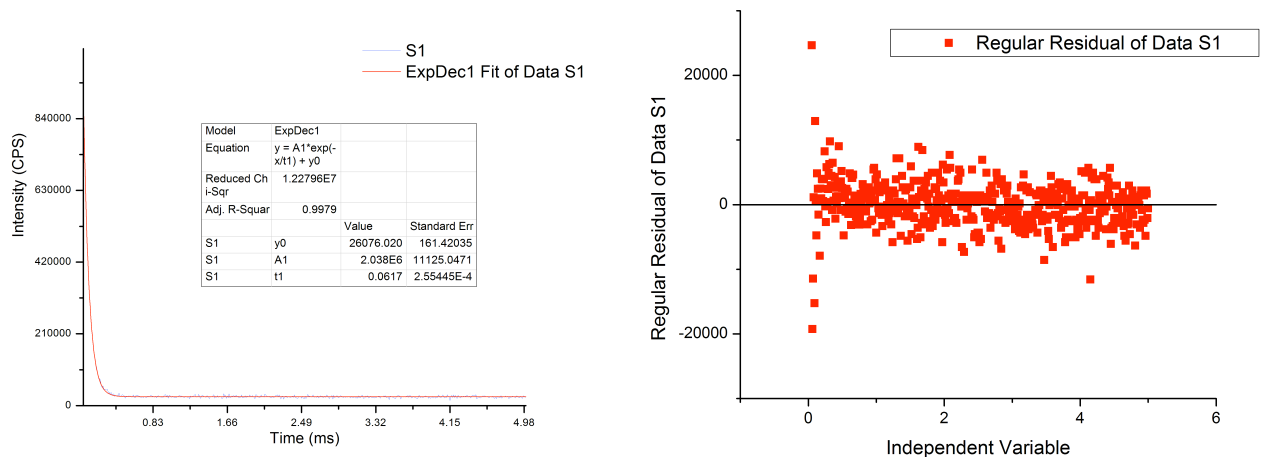

**Trial 2 settings:** sample window: 0.06 ms; averages: 100; max delay: 0.5 ms; slit widths: 2.00 nm both emission and excitation; number of data points: 46.

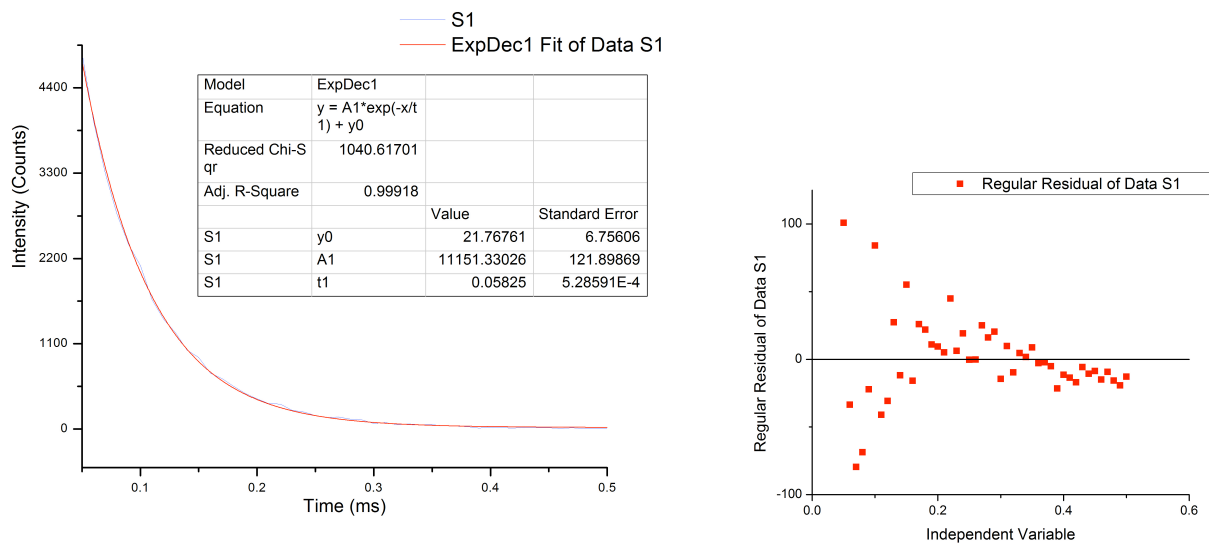

**Trial 3 settings:** sample window: 0.06 ms; averages: 100; max delay: 0.5 ms; slit widths: 2.00 nm both emission and excitation; number of data points: 46.

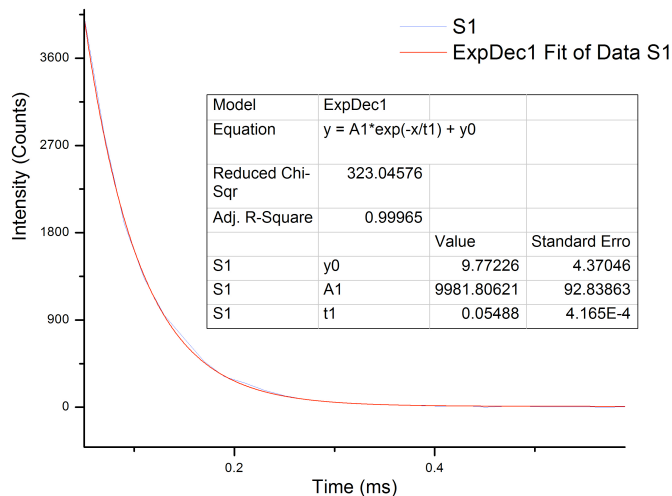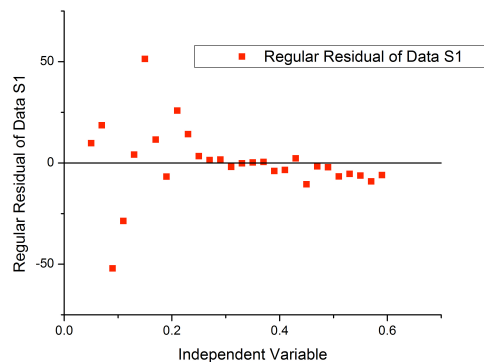

#### 4. Lifetime decay curves of Sm(NO<sub>3</sub>)<sub>3</sub> complex in CH<sub>3</sub>CN, monitored at 600 nm.

**Trial 1 settings:** sample window: 6.00 ms; max delay: 7 ms; averages: 50; slit widths: 3.00 nm both emission and excitation; number of data points: 696.

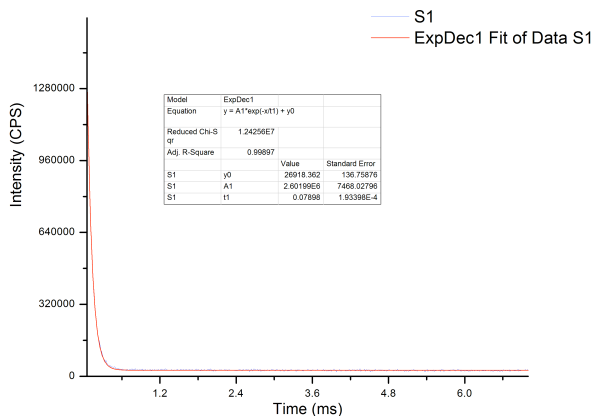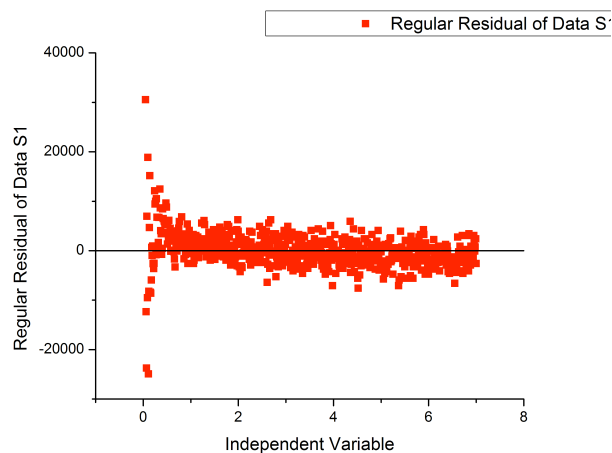

**Trial 2 settings:** sample window: 0.08 ms; max delay: 0.6 ms; averages: 100; slit widths: 2.50 nm both emission and excitation; number of data points: 56.

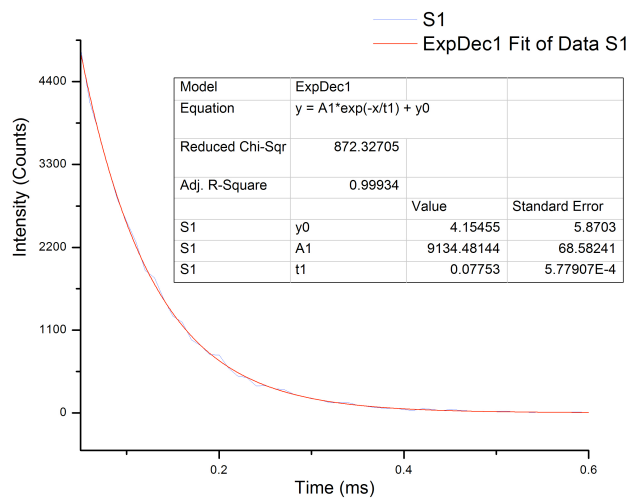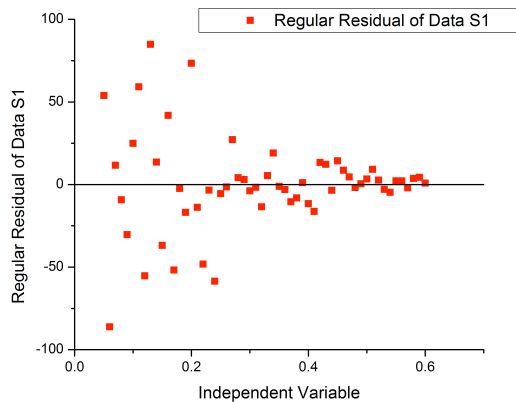

**Trial 3 settings:** sample window: 0.08 ms; max delay: 0.6 ms; averages: 100; slit widths: 2.50 nm both emission and excitation; number of data points: 56.

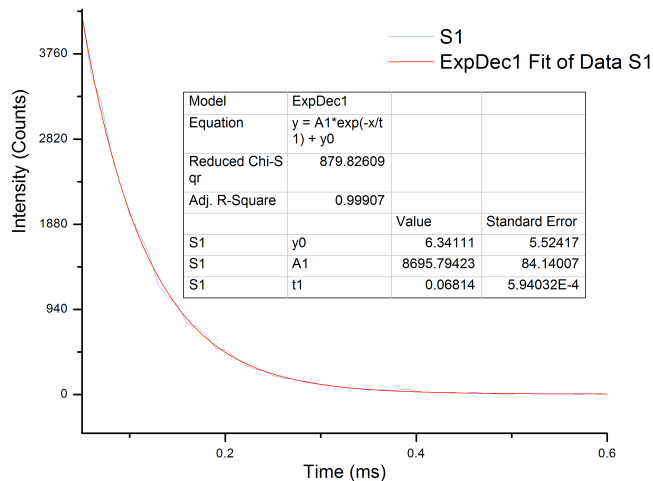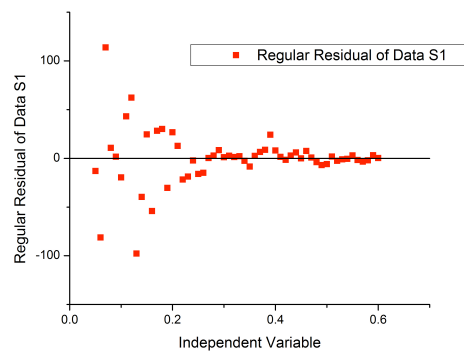

## B. Solid state emission spectra

Solid state emission spectra were acquired by placing solid 1:3 Ln(NO<sub>3</sub>)<sub>3</sub>-4 complex into a quartz cuvette and exciting at 350 nm.

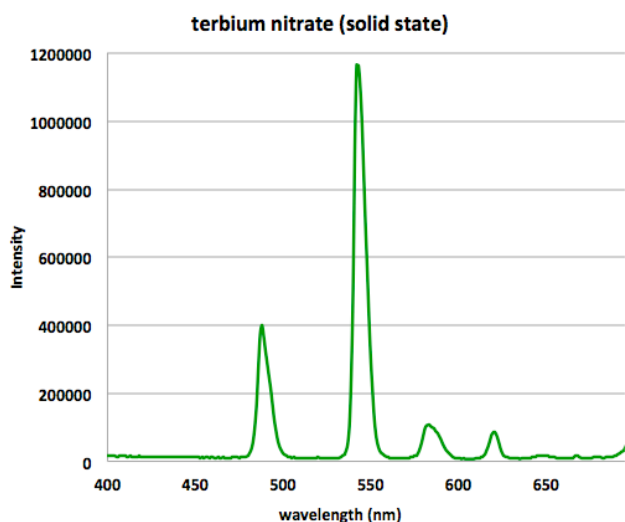

Emission spectrum of 1:3 Tb(NO<sub>3</sub>)<sub>3</sub>-4 in the solid state. Slit widths = 1.0 nm entrance and exit;  $\lambda_{\text{ex}}$  = 350 nm.

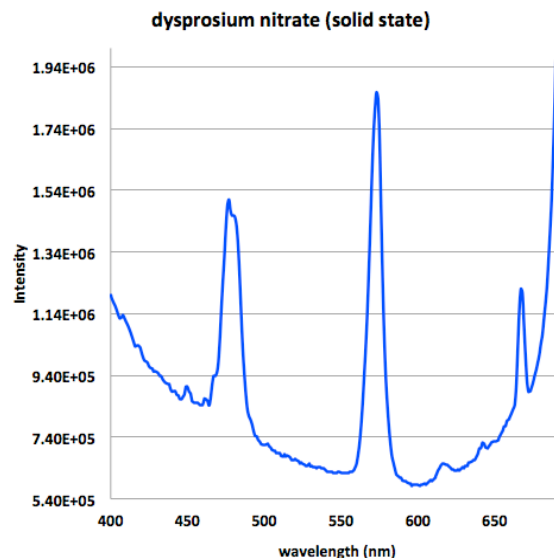

Emission spectrum of 1:3 Dy(NO<sub>3</sub>)<sub>3</sub>-4 in the solid state. Slit widths = 2.0 nm entrance and exit;  $\lambda_{\text{ex}}$  = 350 nm.

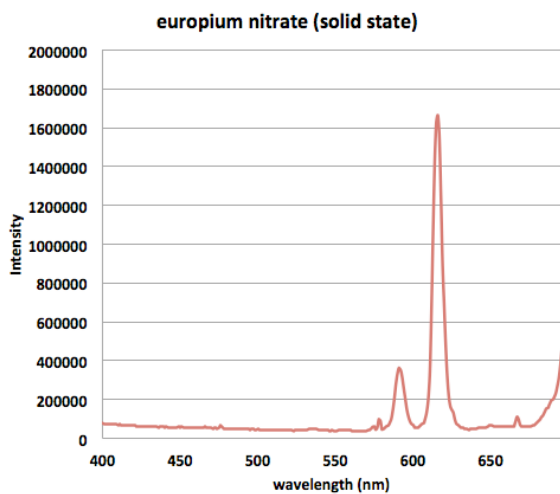

Emission spectrum of 1:3 Eu(NO<sub>3</sub>)<sub>3</sub>-4 in the solid state. Slit widths = 1.0 nm entrance and exit;  $\lambda_{\text{ex}}$  = 350 nm.

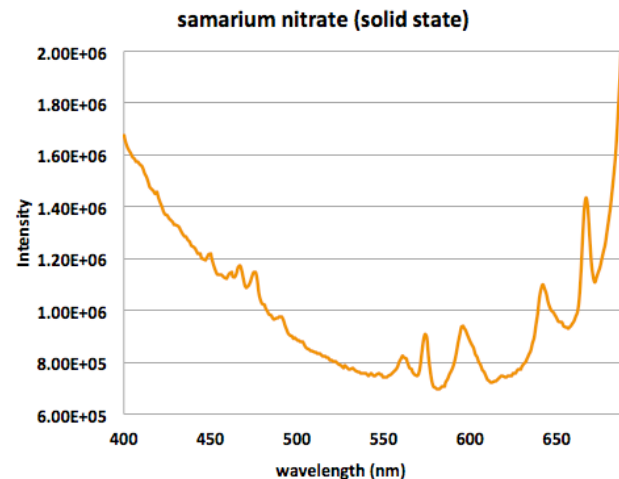

Emission spectrum of 1:3 Sm(NO<sub>3</sub>)<sub>3</sub>-4 in the solid state. Slit widths = 2.0 nm entrance and exit;  $\lambda_{\text{ex}}$  = 350 nm.

**C. Horrocks lifetime decay curves and fitting residuals.** Lifetimes were measured in CH<sub>3</sub>OH or CH<sub>3</sub>OD with a complex concentration of 2.0 mM and three equivalents of ligand relative to Eu(NO<sub>3</sub>)<sub>3</sub>. For all sets of data below, the blue curve is connected data points and the red curve is the fit. All complexes were excited at 350 nm. Please note for each of the residual plots, the units of the x-axis are time (ms), while the units of the y-axis are intensity (counts).

**1. Lifetime decay curves in CH<sub>3</sub>OH monitored at 591 nm; Settings for all trials: sample window: 0.4 ms; max delay: 4.0 ms; averages: 100; excitation and emission slit widths: 5.00 nm; delay incr.: 0.02 ms.**

**Trial 1**

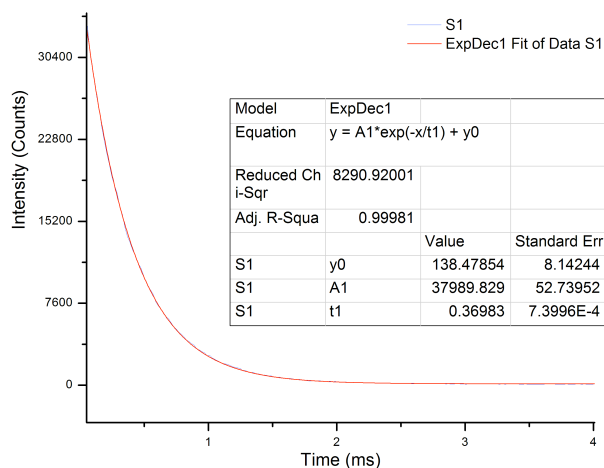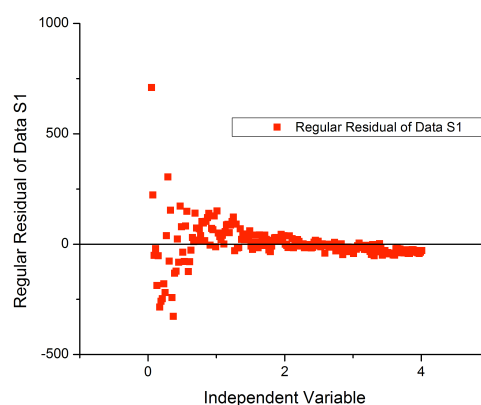

**Trial 2**

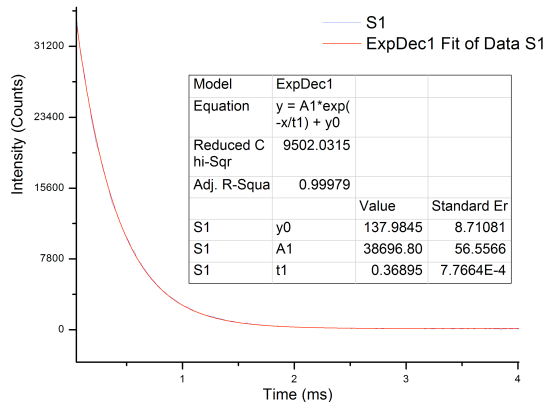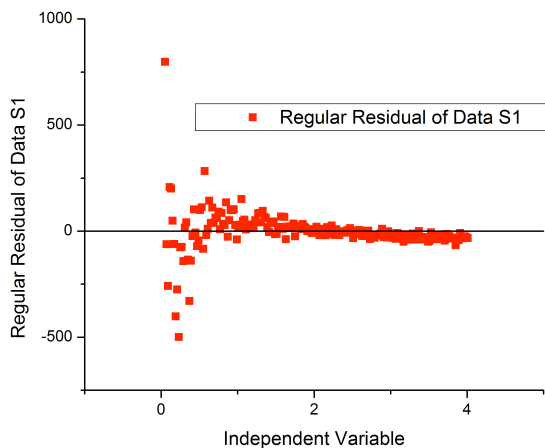

### Trial 3

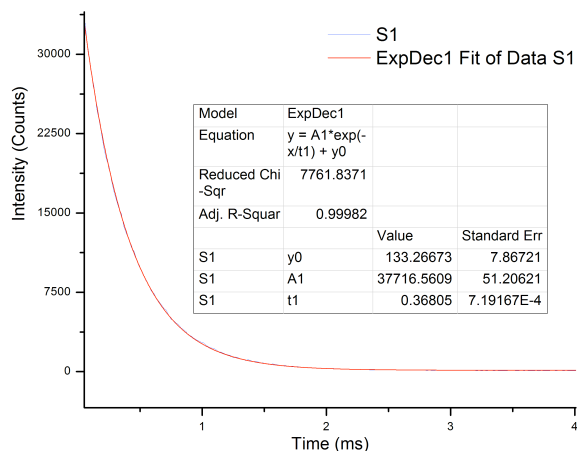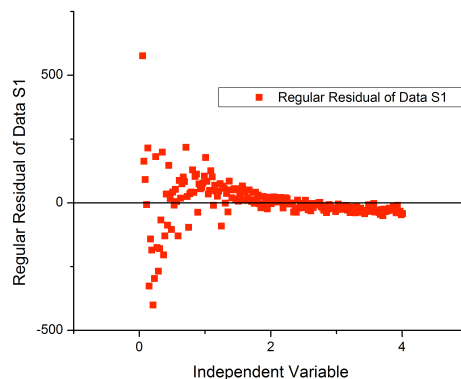

**2. Lifetime decay curves in CH<sub>3</sub>OH monitored at 619 nm; Settings for all trials: sample window: 0.4 ms; max delay: 4.0 ms; averages: 100; excitation and emission slit widths: 5.00 nm; delay incr.: 0.02 ms.**

### Trial 1

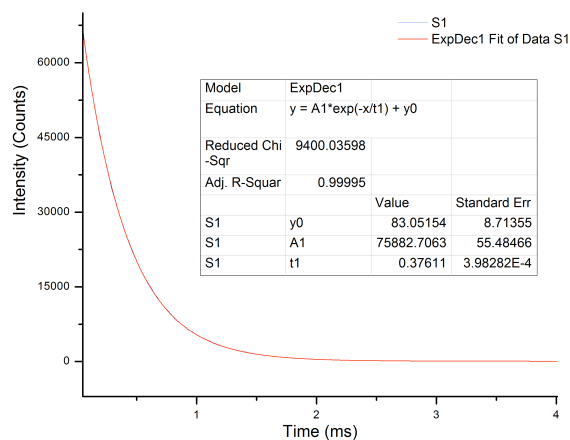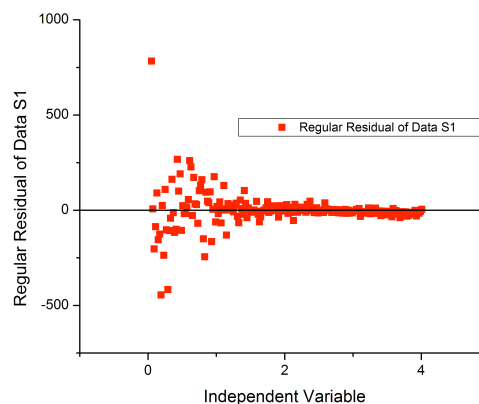



### Trial 2

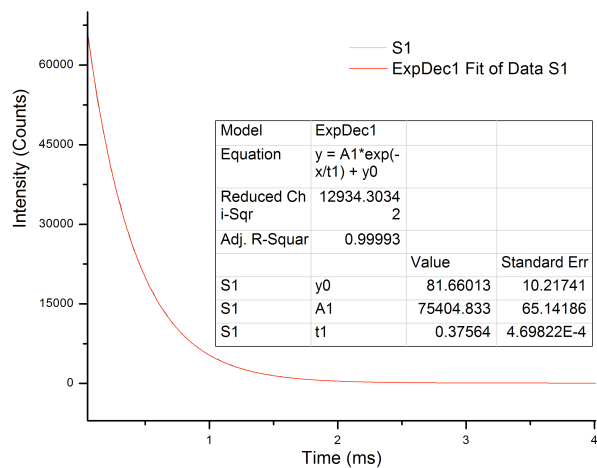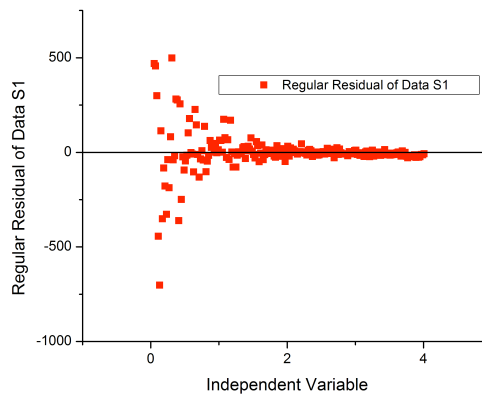

### Trial 3

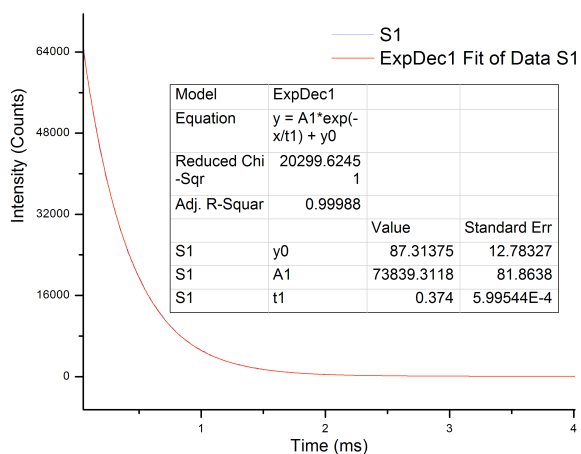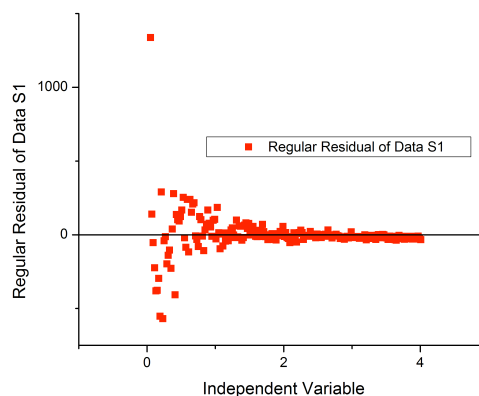

**3. Lifetime decay curves in CH<sub>3</sub>OD monitored at 591 nm; Settings for all trials: sample window: 1.3 ms; max delay: 13.0 ms; averages: 100; excitation and emission slit widths: 5.00 nm; delay incr.: 0.05 ms.**

**Trial 1**

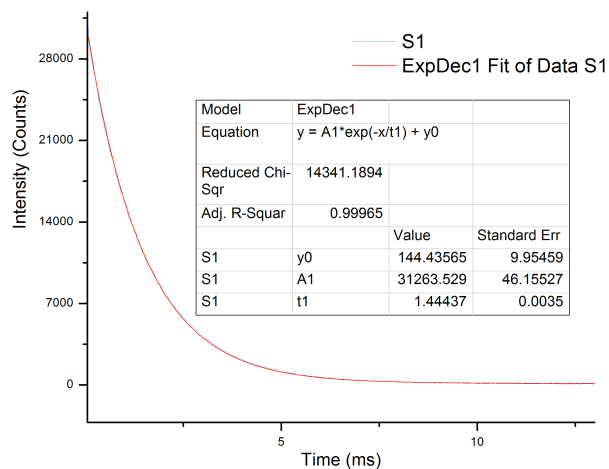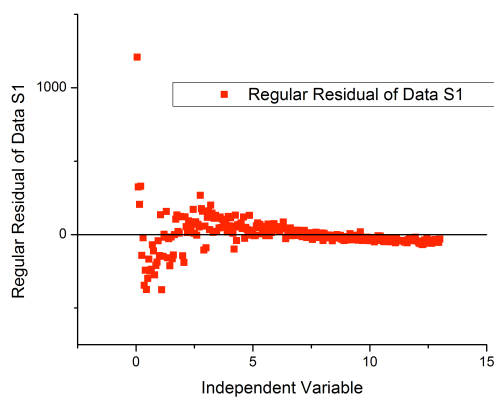

**Trial 2**

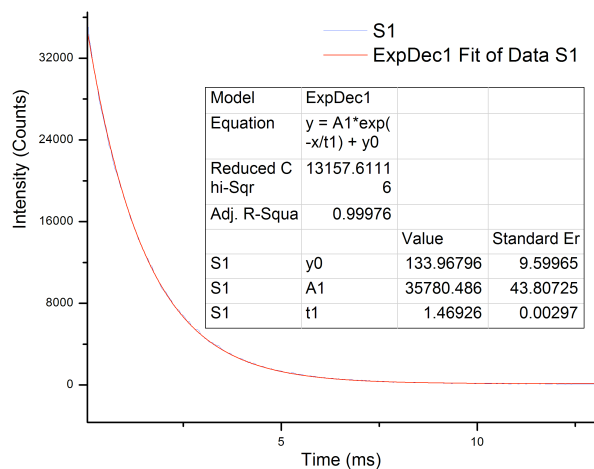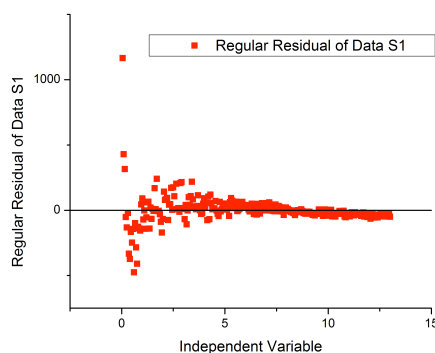

### Trial 3

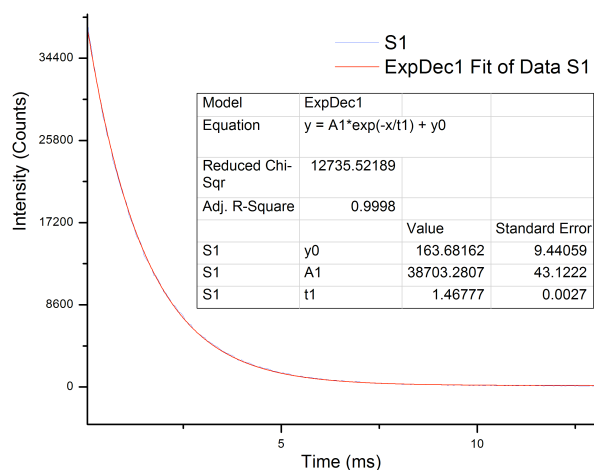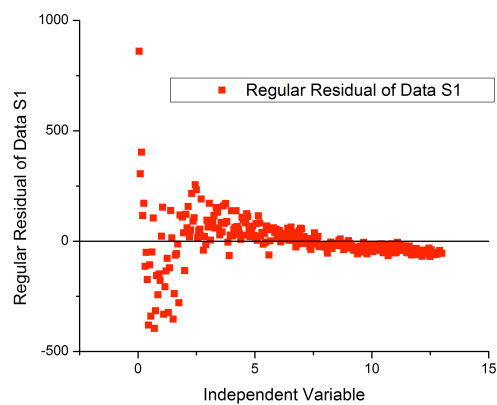

**4. Lifetime decay curves in CH<sub>3</sub>OD monitored at 619 nm; Settings for all trials: sample window: 1.3 ms; max delay: 13.0 ms; averages: 100; excitation and emission slit widths: 5.00 nm; delay incr.: 0.05 ms.**

### Trial 1

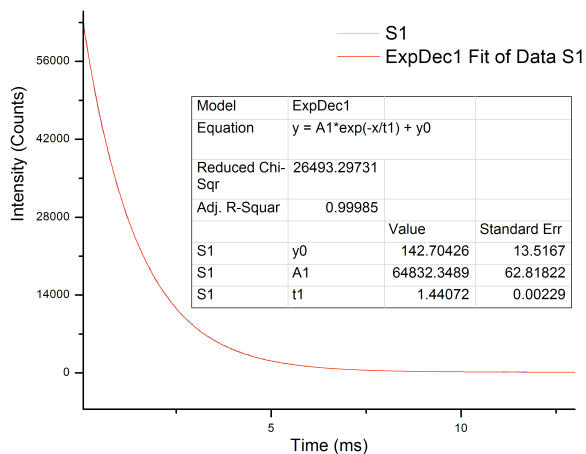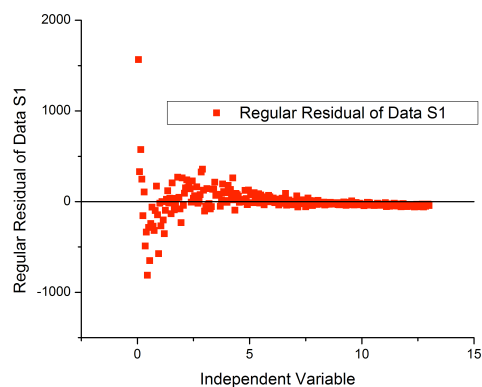

## Trial 2

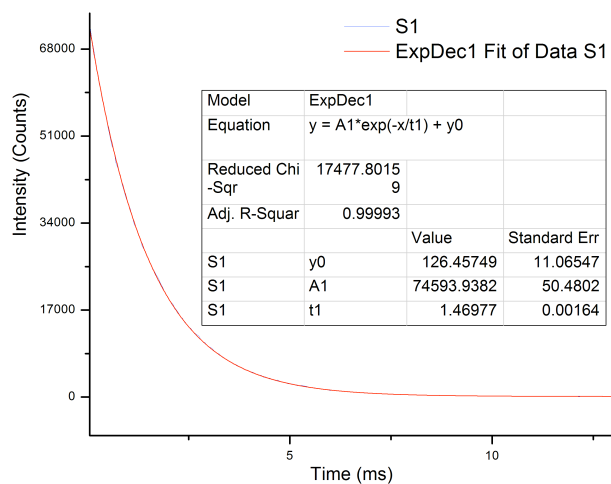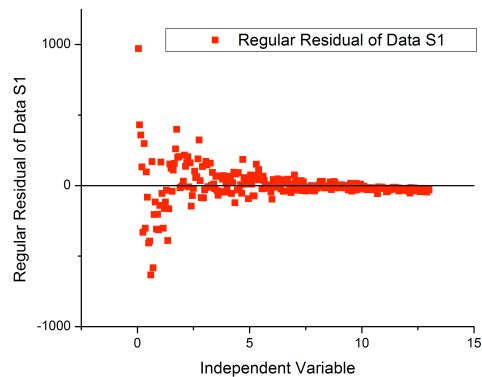

## Trial 3

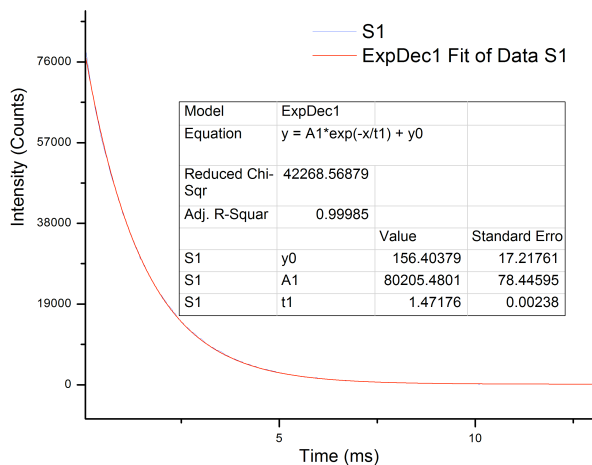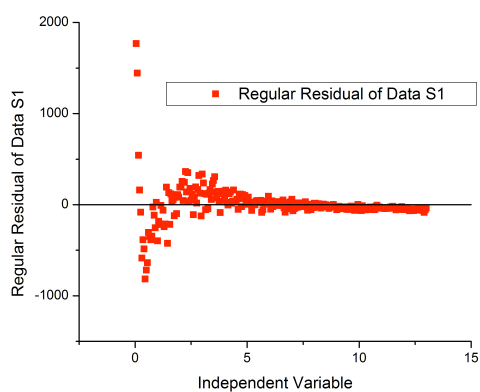

**D. Absorption and excitation spectra – Tb, Eu and Sm complexes.** Absorption (dashed) and excitation (solid) spectra of the Ln(NO<sub>3</sub>)<sub>3</sub>-4 complexes with three equivalents of ligand **4** in acetonitrile (2.0 mM complex concentration). Both absorption and excitation spectra have been normalized to have their peaks at 1 arbitrary unit for ease of comparison.

**1. Tb(NO<sub>3</sub>)<sub>3</sub> complex:  $\lambda_{em}$  monitored at 543 nm, 1.0 nm emission and excitation slits).**

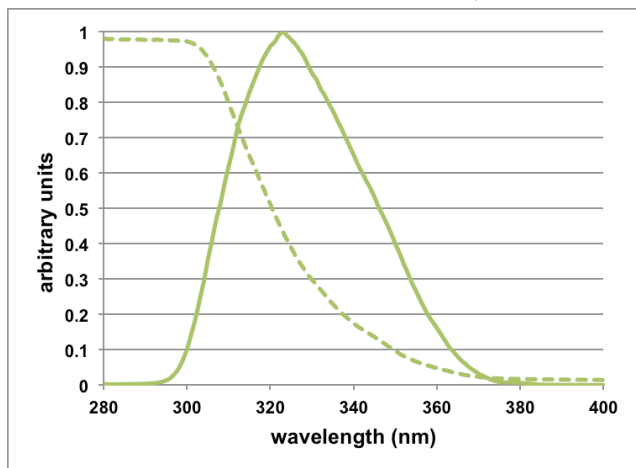

**3. Sm(NO<sub>3</sub>)<sub>3</sub> complex:  $\lambda_{em}$  monitored at 642 nm, 2.5 nm emission and excitation slits).**

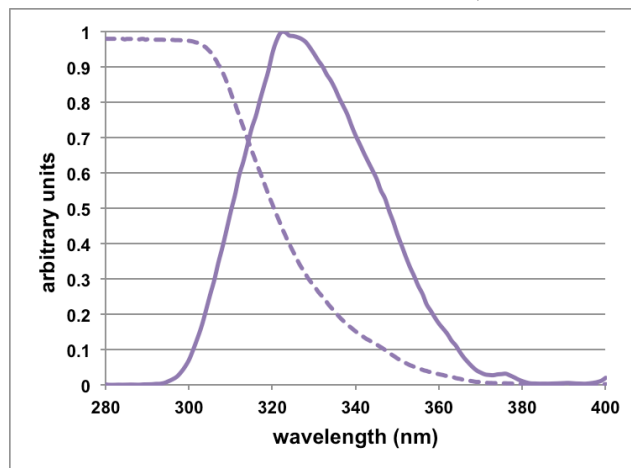

**2. Eu(NO<sub>3</sub>)<sub>3</sub> complex:  $\lambda_{em}$  monitored at 619 nm, 1.0 nm emission and excitation slits).**

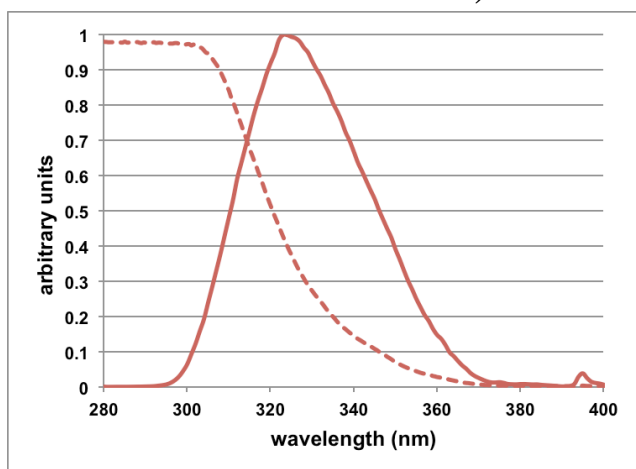

**4. Dy(NO<sub>3</sub>)<sub>3</sub> complex:  $\lambda_{em}$  monitored at 478 nm, 2.0 nm emission and excitation slits).**

*Absorption spectrum of 6.0 mM ligand 4 alone in CH<sub>3</sub>CN is also shown here as dotted grey line.*

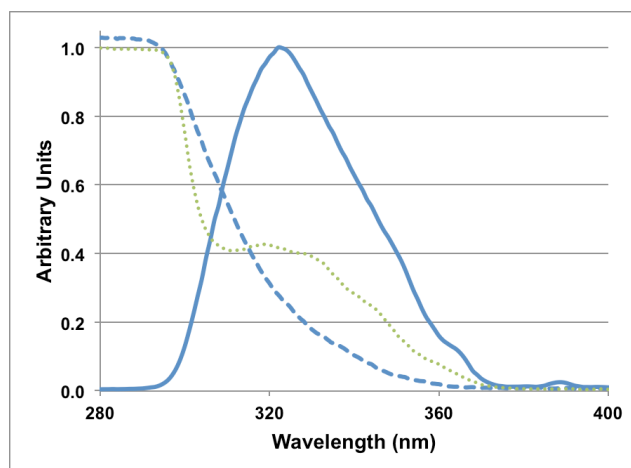

Peak Find - Memory-1

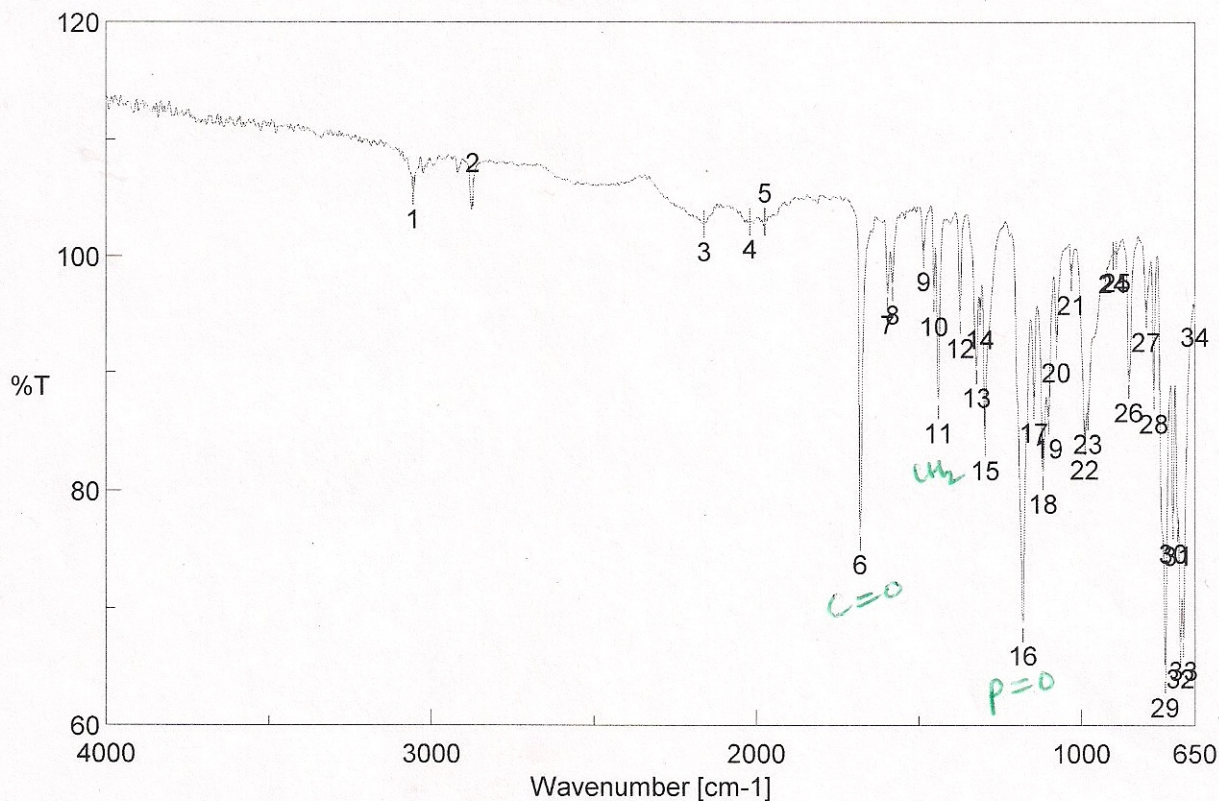

[Detailed Information]

Creation date 6/12/2015 10:46 AM  
 Data array type Linear data array  
 Horizontal axis Wavenumber [cm-1]  
 Vertical axis %T  
 Start 649.893 cm-1  
 End 4000.6 cm-1  
 Data interval 0.964233 cm-1  
 Data points 3476

[ Result of Peak Picking ]

| No. | Position | Intensity | No. | Position | Intensity |
|-----|----------|-----------|-----|----------|-----------|
| 1   | 3055.66  | 105.557   | 2   | 2871.49  | 105.52    |
| 3   | 2160.85  | 102.777   | 4   | 2019.1   | 103.005   |
| 5   | 1972.82  | 102.963   | 6   | 1679.69  | 76.1143   |
| 7   | 1595.81  | 96.5224   | 8   | 1580.38  | 97.3496   |
| 9   | 1484.92  | 100.197   | 10  | 1454.06  | 96.3512   |
| 11  | 1439.6   | 87.218    | 12  | 1372.1   | 94.5051   |
| 13  | 1321.96  | 90.226    | 14  | 1311.36  | 95.2685   |
| 15  | 1295.93  | 84.094    | 16  | 1179.26  | 68.3544   |
| 17  | 1146.47  | 87.2427   | 18  | 1117.55  | 81.2567   |
| 19  | 1101.15  | 85.9478   | 20  | 1076.08  | 92.3742   |
| 21  | 1029.8   | 98.1853   | 22  | 989.304  | 84.1331   |
| 23  | 978.697  | 86.3355   | 24  | 901.558  | 100.03    |
| 25  | 891.916  | 100.127   | 26  | 853.347  | 88.9687   |
| 27  | 800.314  | 94.9989   | 28  | 777.172  | 88.0239   |

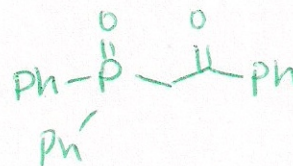

SB 2-60-03 Cpg 2

[ Result of Peak Picking ]

| No. | Position | Intensity |
|-----|----------|-----------|
| 29  | 742.46   | 63.9233   |
| 31  | 703.89   | 76.8577   |
| 33  | 686.534  | 67.0835   |

| No. | Position | Intensity |
|-----|----------|-----------|
| 30  | 717.39   | 77.0507   |
| 32  | 695.212  | 66.4142   |
| 34  | 650.858  | 95.4847   |

SB2-60-05 Tb-Phenolph complex

1:3 3:1

Peak Find - Memory-2

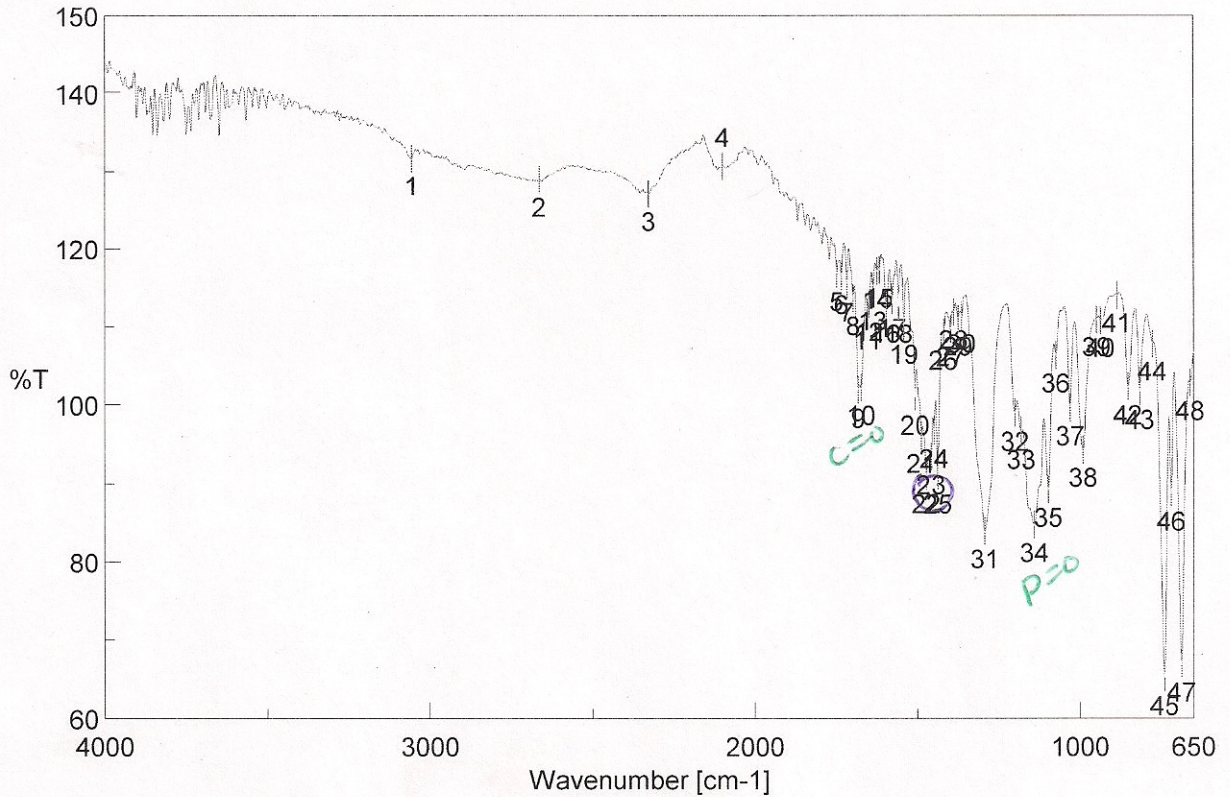

[Detailed Information]

Creation date 6/12/2015 10:54 AM  
 Data array type Linear data array  
 Horizontal axis Wavenumber [cm-1]  
 Vertical axis %T  
 Start 649.893 cm-1  
 End 4000.6 cm-1  
 Data interval 0.964233 cm-1  
 Data points 3476

[ Result of Peak Picking ]

| No. | Position | Intensity | No. | Position | Intensity |
|-----|----------|-----------|-----|----------|-----------|
| 1   | 3055.66  | 131.686   | 2   | 2663.21  | 128.895   |
| 3   | 2326.7   | 127.043   | 4   | 2100.1   | 130.678   |
| 5   | 1748.16  | 116.828   | 6   | 1732.73  | 116.394   |
| 7   | 1716.34  | 115.482   | 8   | 1697.05  | 113.671   |
| 9   | 1681.62  | 101.825   | 10  | 1672.95  | 102.176   |
| 11  | 1652.7   | 111.763   | 12  | 1647.88  | 112.887   |
| 13  | 1636.3   | 114.322   | 14  | 1623.77  | 117.096   |
| 15  | 1617.02  | 117.254   | 16  | 1594.84  | 112.65    |
| 17  | 1577.49  | 113.359   | 18  | 1558.2   | 112.637   |
| 19  | 1540.85  | 109.995   | 20  | 1507.1   | 100.966   |
| 21  | 1487.81  | 96.1899   | 22  | 1472.38  | 91.0267   |
| 23  | 1457.92  | 93.4174   | 24  | 1448.28  | 96.7837   |
| 25  | 1436.71  | 90.9663   | 26  | 1419.35  | 109.185   |
| 27  | 1396.21  | 109.639   | 28  | 1387.53  | 111.91    |



SB 2-60-05 (cont pg 2)

[ Result of Peak Picking ]

| No. | Position | Intensity | No. | Position | Intensity |
|-----|----------|-----------|-----|----------|-----------|
| 29  | 1374.03  | 110.982   | 30  | 1363.43  | 111.359   |
| 31  | 1292.07  | 83.942    | 32  | 1199.51  | 98.9522   |
| 33  | 1180.22  | 96.664    | 34  | 1140.69  | 84.7523   |
| 35  | 1097.3   | 89.2689   | 36  | 1073.19  | 106.3     |
| 37  | 1028.84  | 99.6492   | 38  | 990.268  | 94.3737   |
| 39  | 948.806  | 110.907   | 40  | 936.271  | 110.783   |
| 41  | 886.131  | 114.049   | 42  | 851.418  | 102.227   |
| 43  | 814.777  | 101.666   | 44  | 777.172  | 107.826   |
| 45  | 740.531  | 65.1441   | 46  | 718.354  | 88.7708   |
| 47  | 687.498  | 66.9022   | 48  | 660.5    | 102.759   |

SB 2-60-04 FT-IR by -Anandaph

1:3

Peak Find - Memory-1

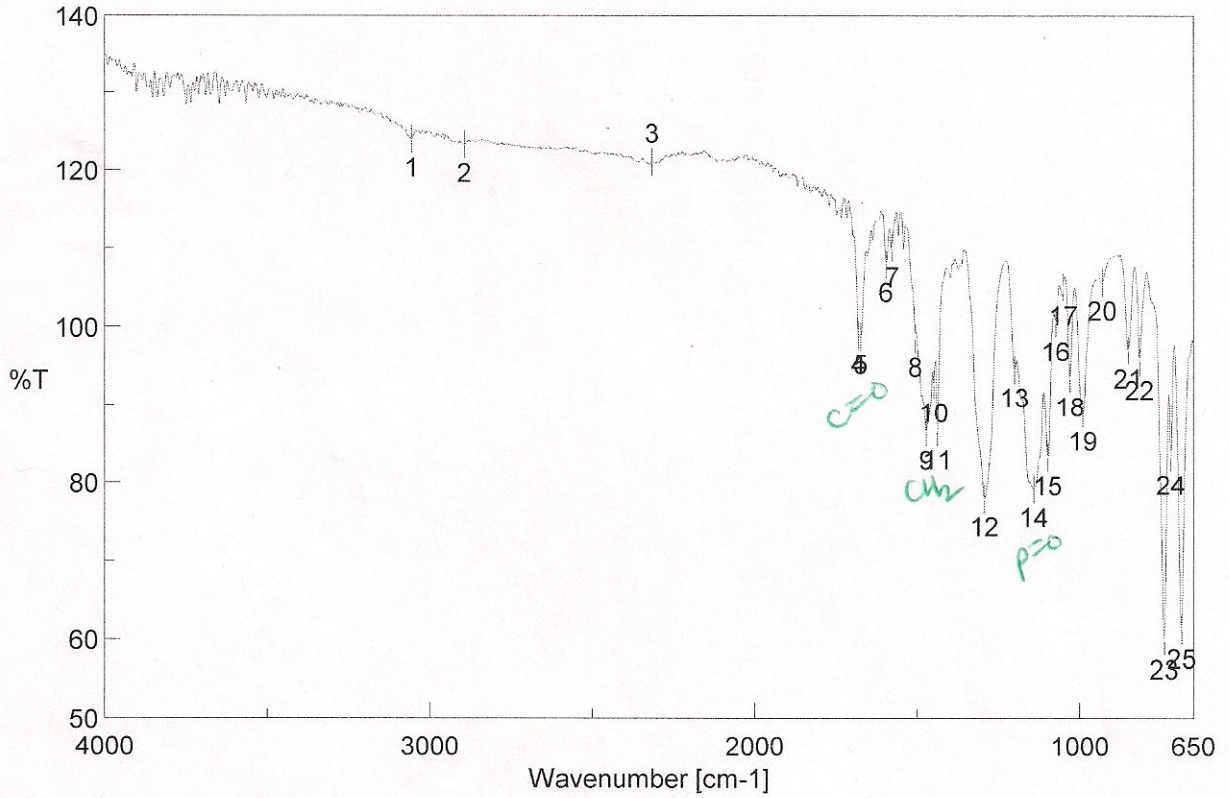

[Detailed Information]

Creation date 6/12/2015 10:50 AM

Data array type Linear data array  
 Horizontal axis Wavenumber [cm-1]  
 Vertical axis %T  
 Start 649.893 cm-1  
 End 4000.6 cm-1  
 Data interval 0.964233 cm-1  
 Data points 3476

[ Result of Peak Picking ]

| No. | Position | Intensity | No. | Position | Intensity |
|-----|----------|-----------|-----|----------|-----------|
| 1   | 3055.66  | 123.918   | 2   | 2892.7   | 123.22    |
| 3   | 2316.09  | 120.977   | 4   | 1680.66  | 98.8873   |
| 5   | 1673.91  | 98.8136   | 6   | 1594.84  | 107.942   |
| 7   | 1576.52  | 109.941   | 8   | 1506.13  | 98.4659   |
| 9   | 1472.38  | 86.4366   | 10  | 1448.28  | 92.549    |
| 11  | 1437.67  | 86.4538   | 12  | 1292.07  | 77.9521   |
| 13  | 1200.47  | 94.5156   | 14  | 1141.65  | 79.097    |
| 15  | 1098.26  | 83.1229   | 16  | 1073.19  | 100.442   |
| 17  | 1050.05  | 104.962   | 18  | 1028.84  | 93.3269   |
| 19  | 990.268  | 88.8827   | 20  | 929.521  | 105.572   |
| 21  | 850.454  | 96.9813   | 22  | 814.777  | 95.5141   |
| 23  | 740.531  | 59.7747   | 24  | 719.318  | 83.2413   |
| 25  | 686.534  | 61.1557   |     |          |           |

SBZ-60-02 FTIR 3:1 PhCNP(Ph-SmClO<sub>3</sub>)<sub>3</sub>

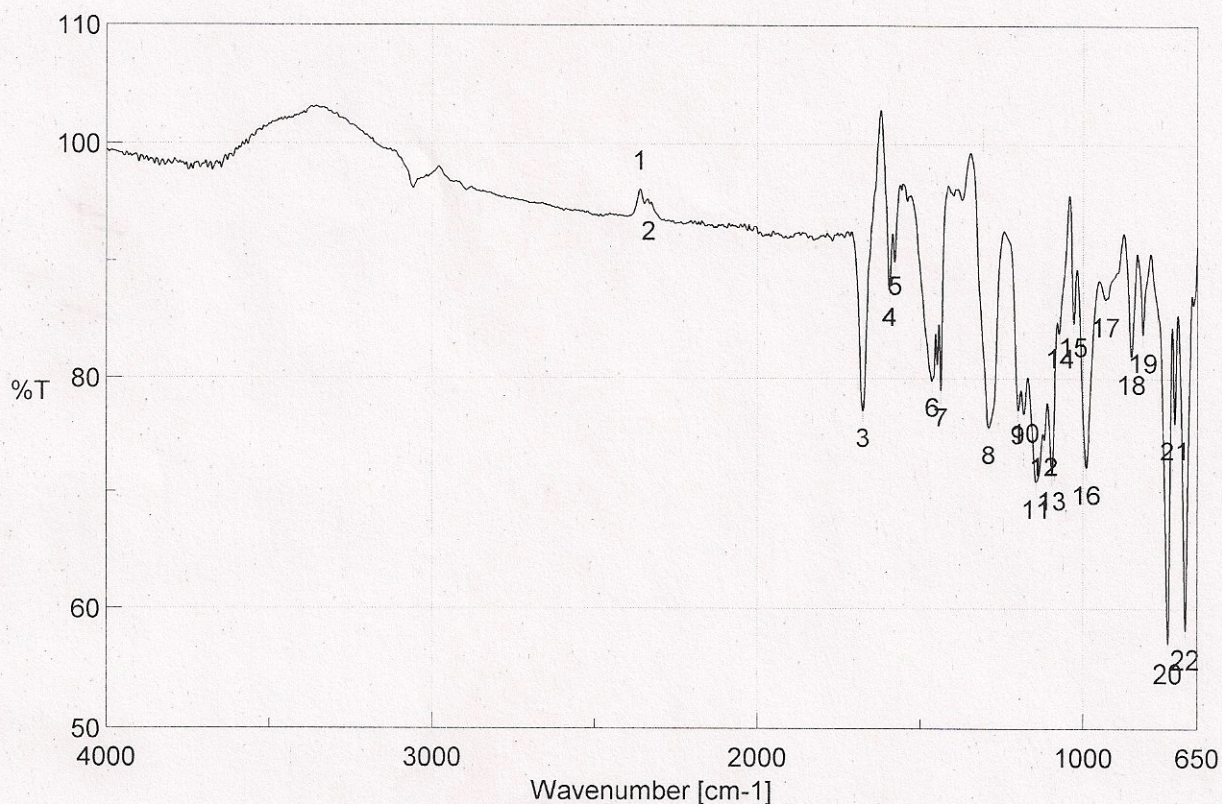

[ Result of Peak Picking ]

| No. | Position | Intensity | No. | Position | Intensity |
|-----|----------|-----------|-----|----------|-----------|
| 1   | 2362.37  | 96.0866   | 2   | 2333.45  | 94.9927   |
| 3   | 1676.8   | 77.2041   | 4   | 1594.84  | 87.6516   |
| 5   | 1577.49  | 90.3771   | 6   | 1463.71  | 79.9014   |
| 7   | 1437.67  | 79.0377   | 8   | 1290.14  | 75.6922   |
| 9   | 1201.43  | 77.4917   | 10  | 1178.29  | 77.6755   |
| 11  | 1145.51  | 70.8827   | 12  | 1120.44  | 74.6647   |
| 13  | 1096.33  | 71.6272   | 14  | 1071.26  | 84.1375   |
| 15  | 1029.8   | 85.0865   | 16  | 990.268  | 72.1522   |
| 17  | 932.414  | 86.7839   | 18  | 852.382  | 81.8908   |
| 19  | 816.706  | 83.7674   | 20  | 740.531  | 57.0645   |
| 21  | 718.354  | 76.1039   | 22  | 686.534  | 58.1981   |

SB2-60-01 FT-IR 3:1 Phenolph-Eu(NO<sub>3</sub>)<sub>3</sub>

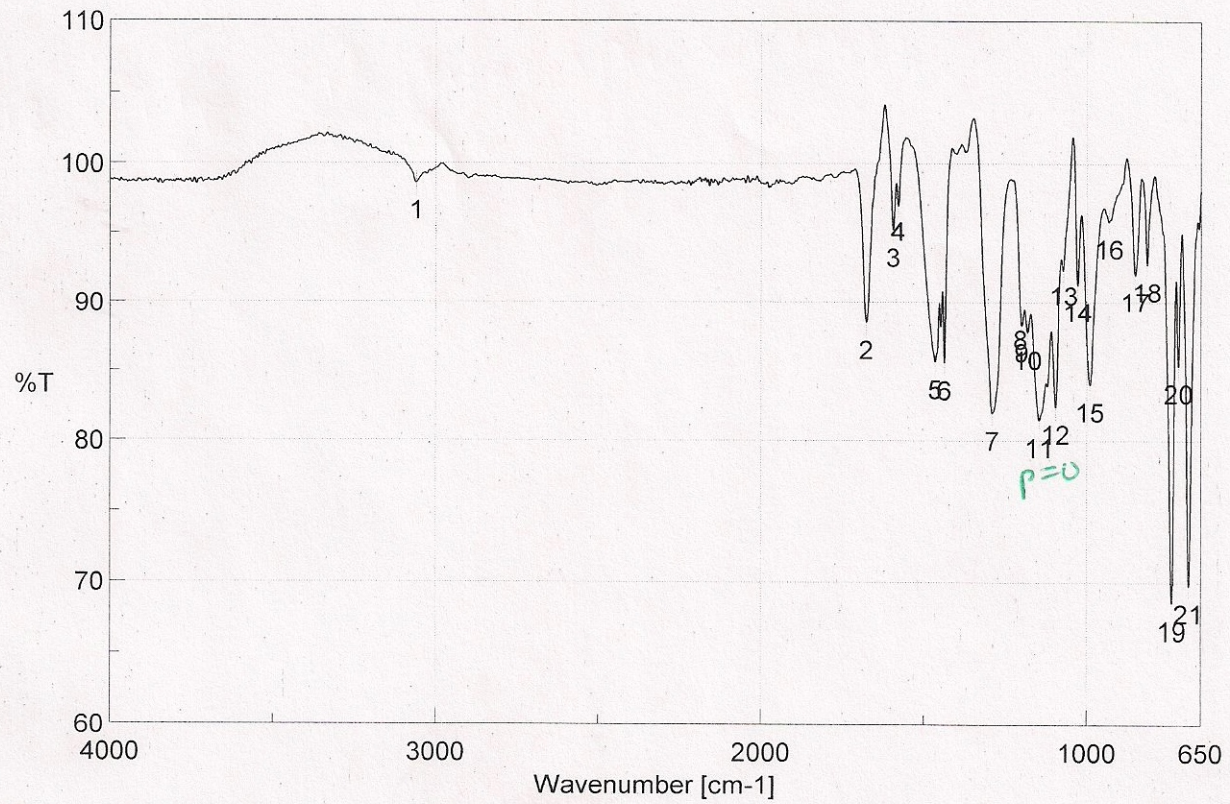

[ Result of Peak Picking ]

| No. | Position | Intensity | No. | Position | Intensity |                 |
|-----|----------|-----------|-----|----------|-----------|-----------------|
| 1   | 3059.51  | 98.5988   | 2   | 1676.8   | 88.5003   | C=O             |
| 3   | 1594.84  | 95.2336   | 4   | 1580.38  | 97.1268   |                 |
| 5   | 1466.6   | 85.658    | 6   | 1437.67  | 85.5804   | CH <sub>2</sub> |
| 7   | 1290.14  | 81.9584   | 8   | 1204.33  | 89.2419   |                 |
| 9   | 1201.43  | 88.31     | 10  | 1182.15  | 87.7719   |                 |
| 11  | 1146.47  | 81.4564   | 12  | 1096.33  | 82.4255   |                 |
| 13  | 1071.26  | 92.4483   | 14  | 1027.87  | 91.2243   |                 |
| 15  | 991.232  | 84.0176   | 16  | 932.414  | 95.8519   |                 |
| 17  | 852.382  | 92.0035   | 18  | 815.742  | 92.7164   |                 |
| 19  | 739.567  | 68.5252   | 20  | 718.354  | 85.3427   |                 |
| 21  | 687.498  | 69.7481   |     |          |           |                 |

9/5/14  
8B

Std proton

File: Proton

Pulse Sequence: s2pul1

Solvent: cdcl3

Ambient temperature

Operator: biras

INNOVA-400 "woodward.gvsu.edu"

Relax. delay 1.000 sec

Pulse 45.0 degrees

Acq. time 2.053 sec

Width 7578.6 Hz

16 repetitions

OBSERVE HI 899.7695340 MHz

DATA PROCESSING

Line broadening 0.2 Hz

FT size 65536

Total time 0 min, 55 sec

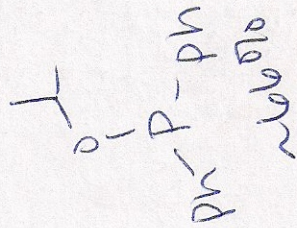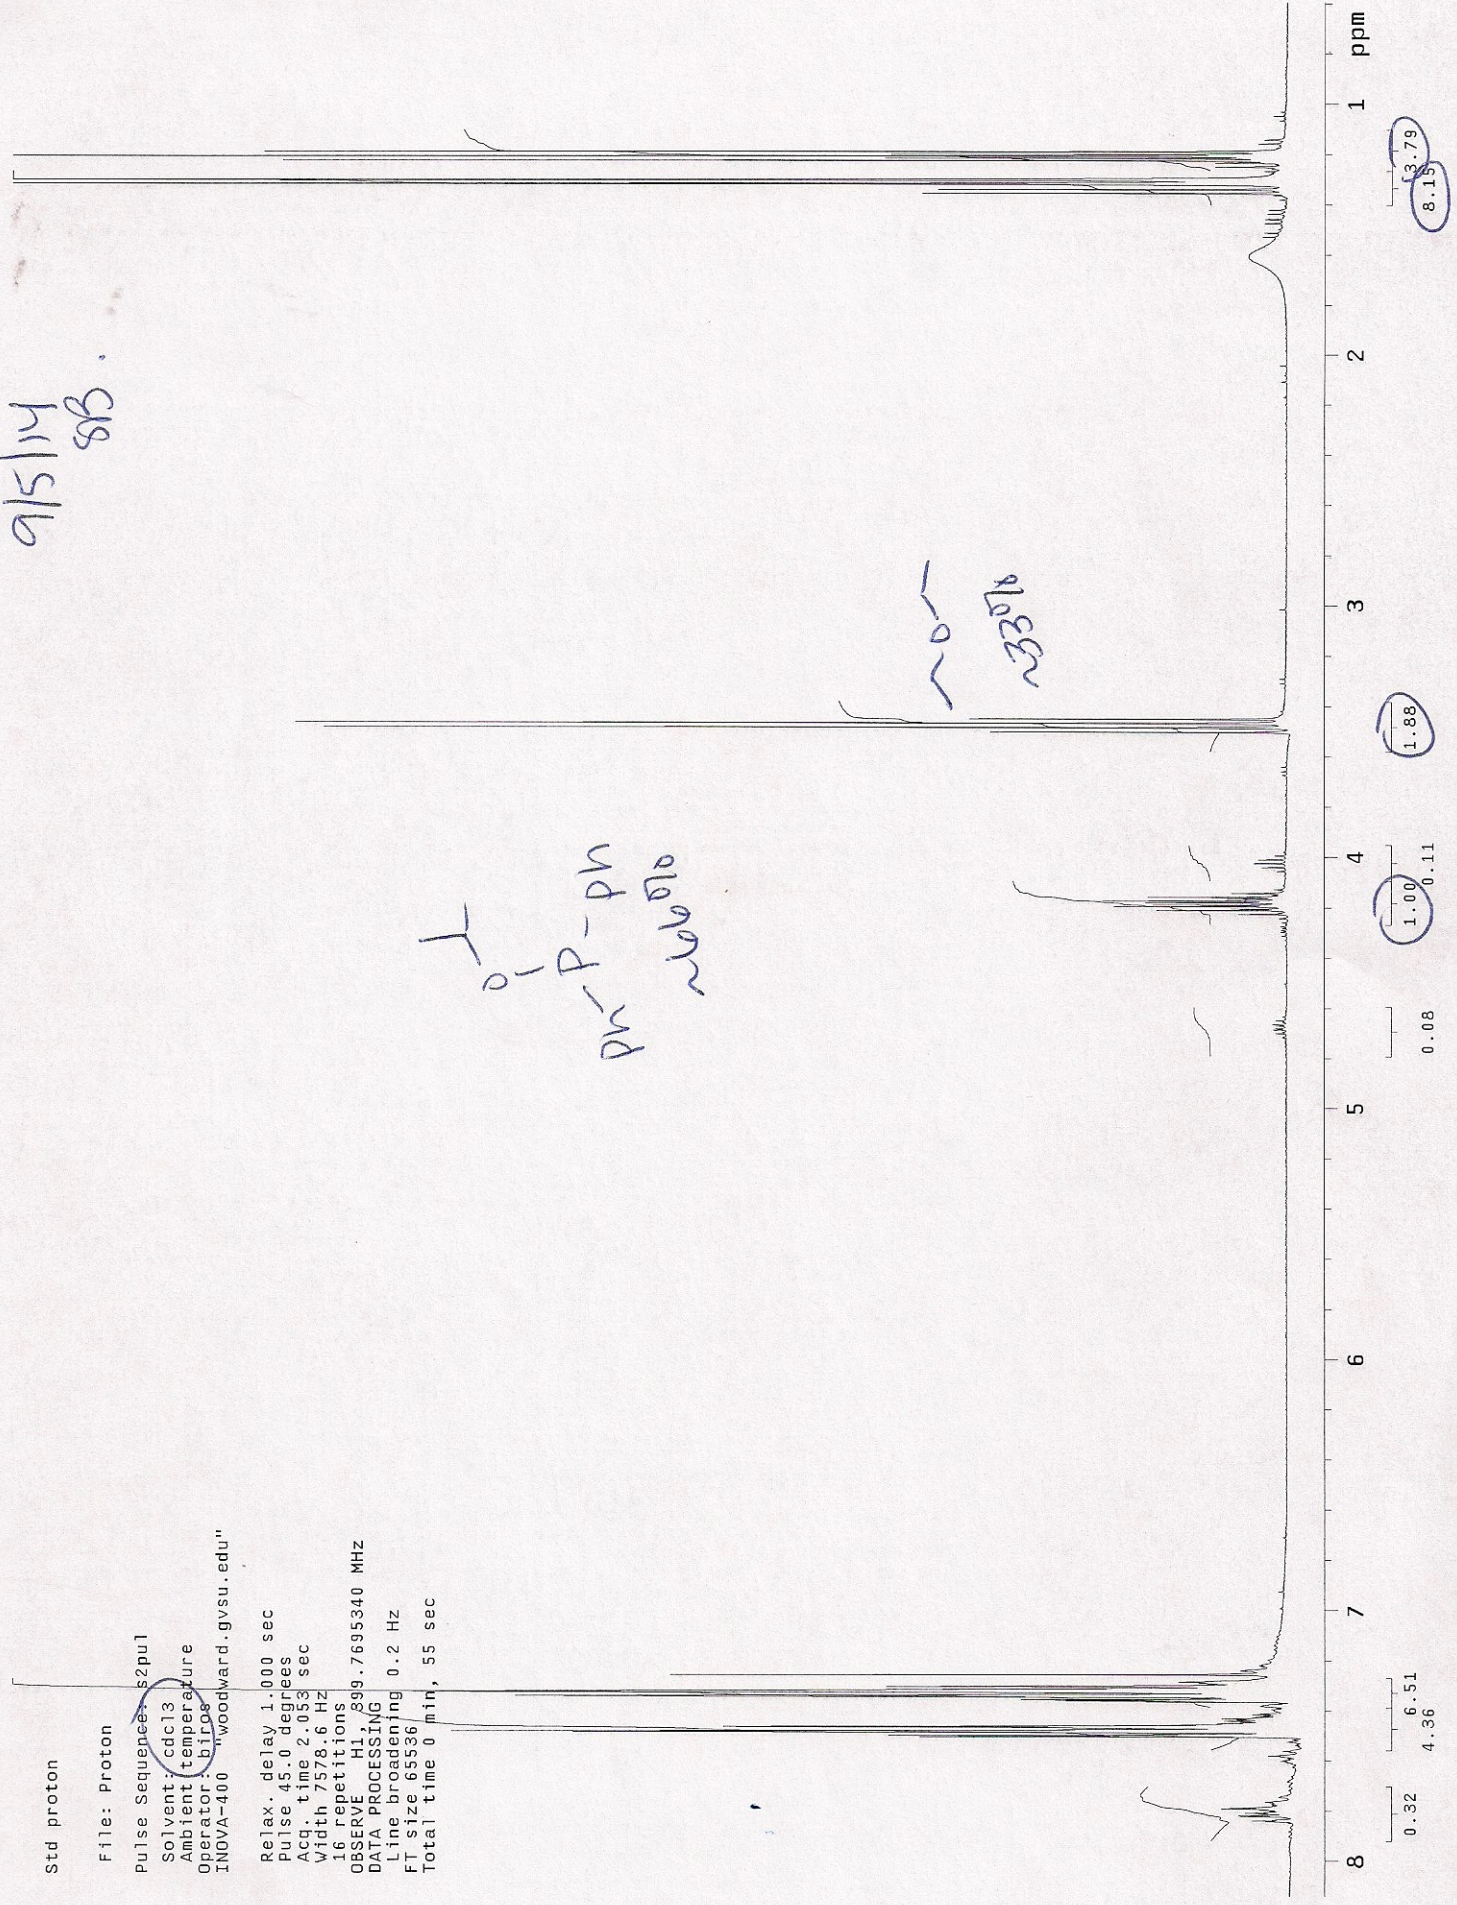

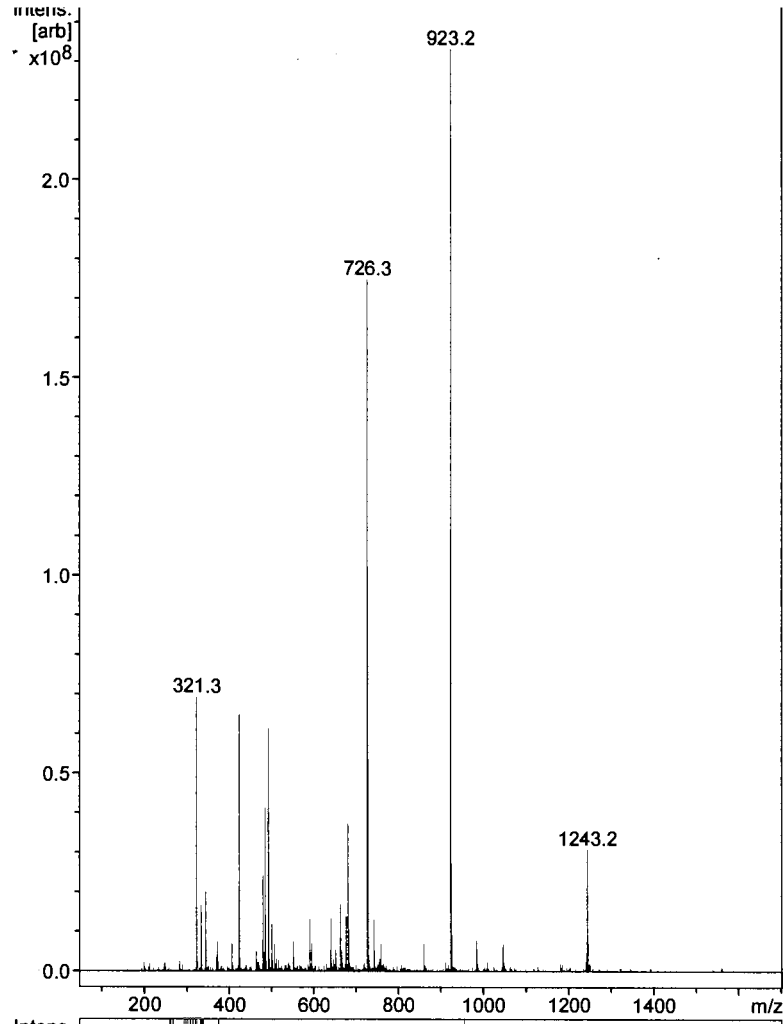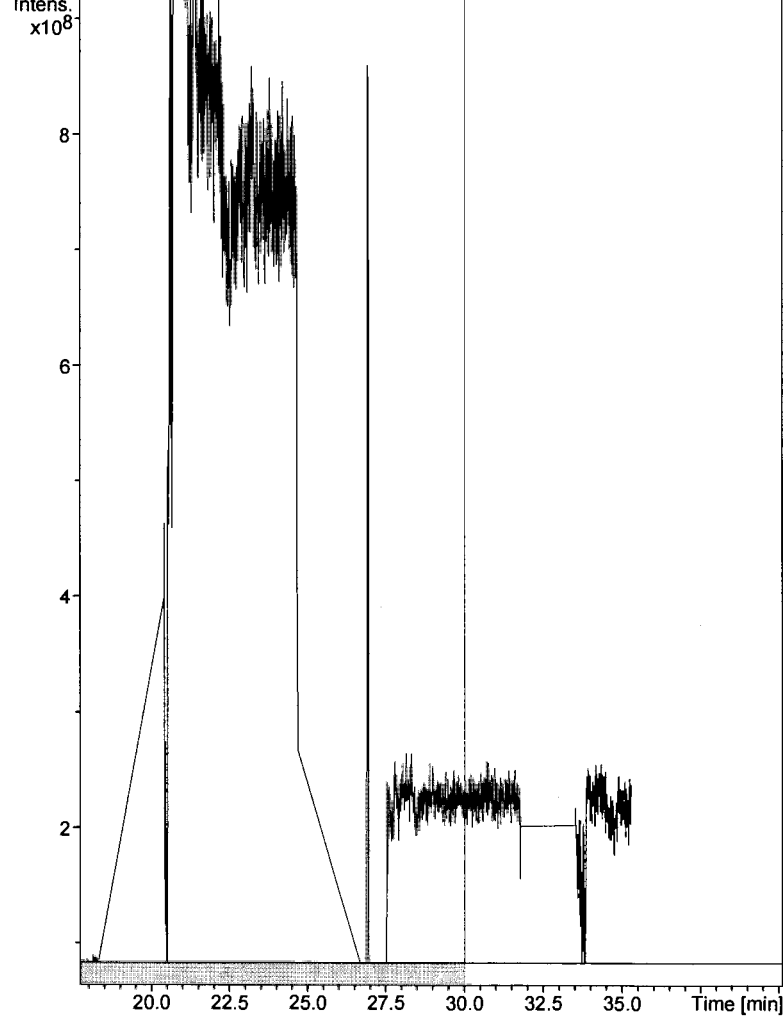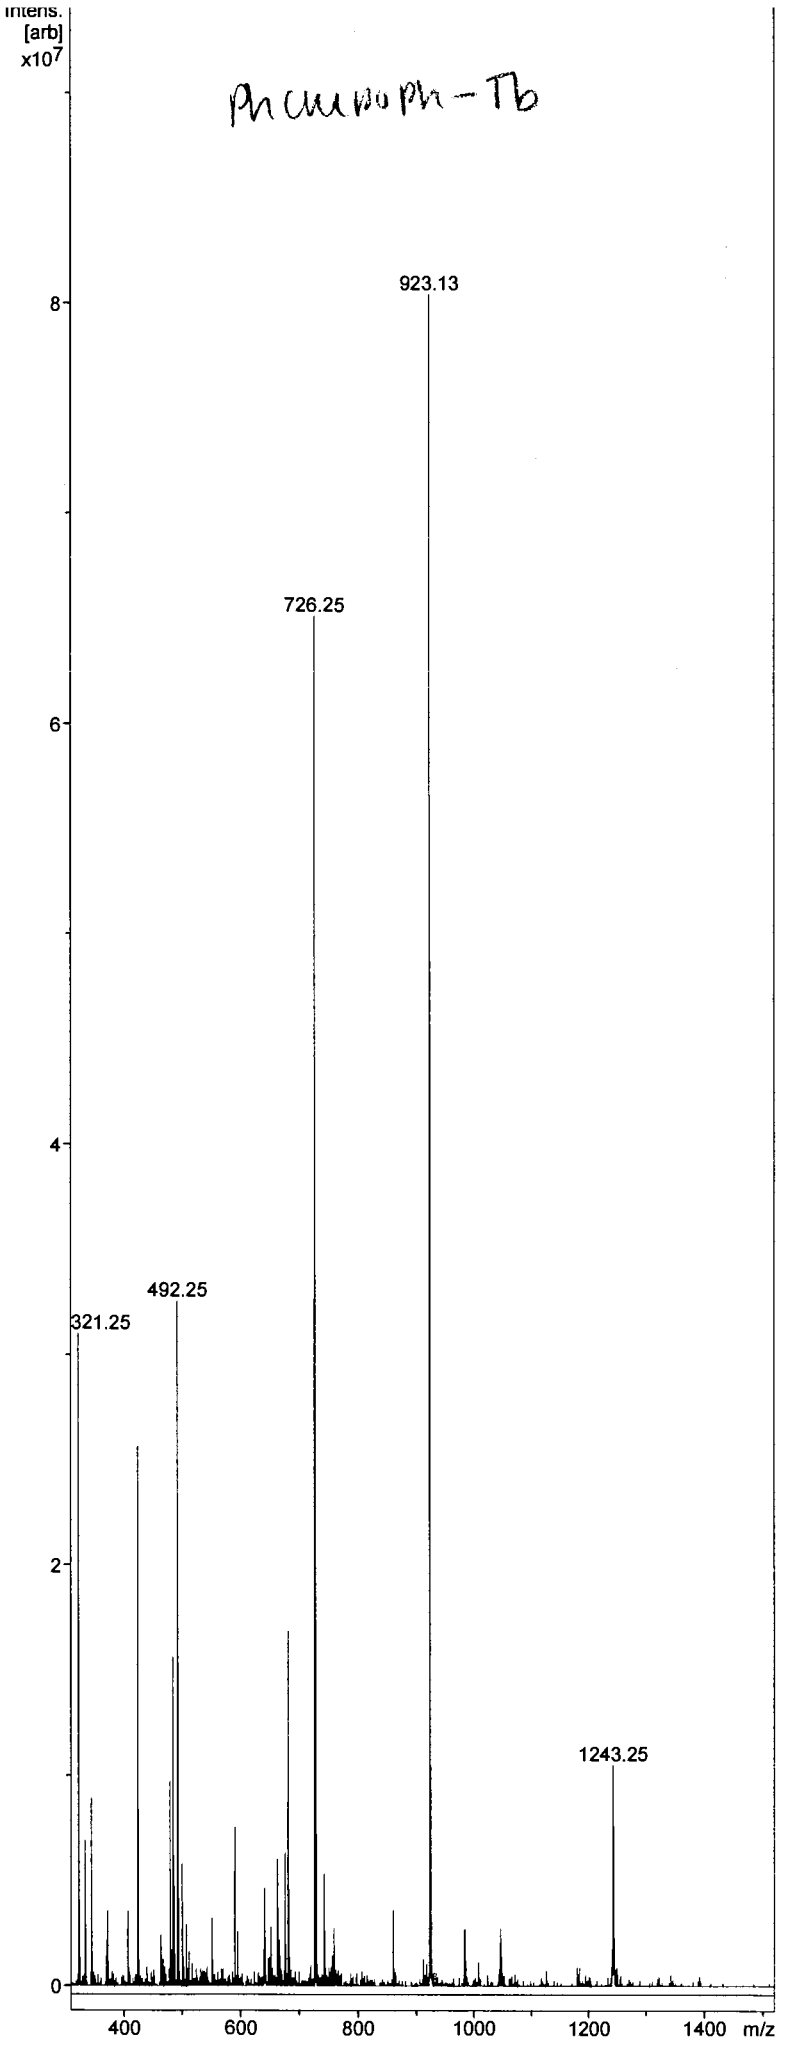

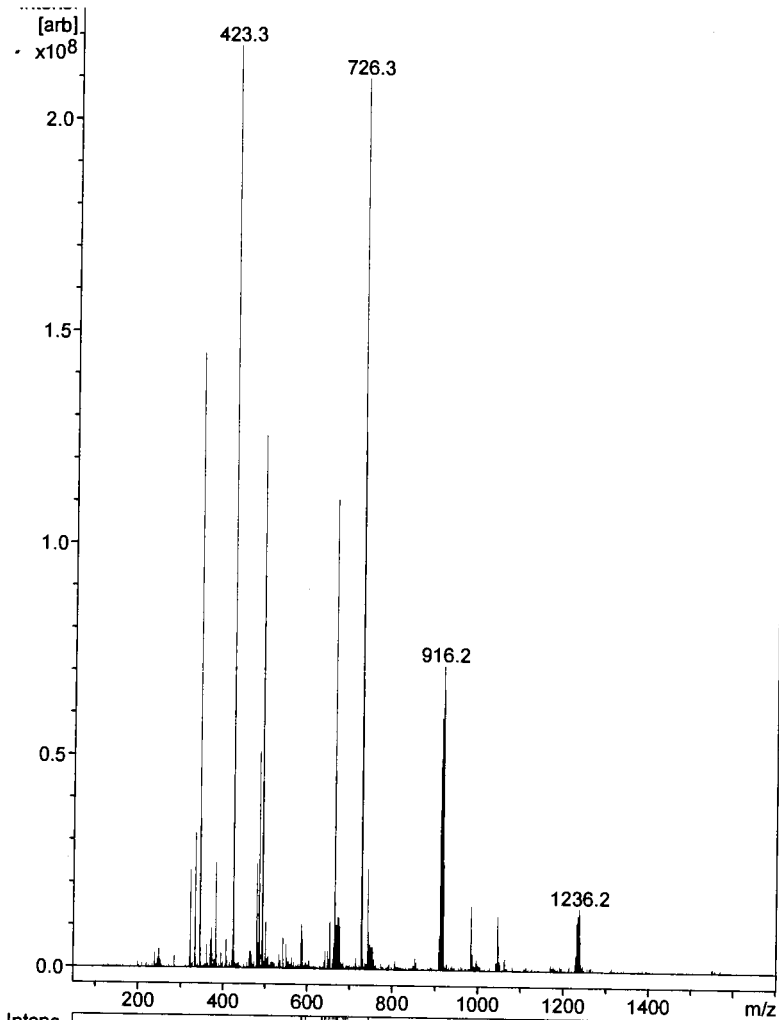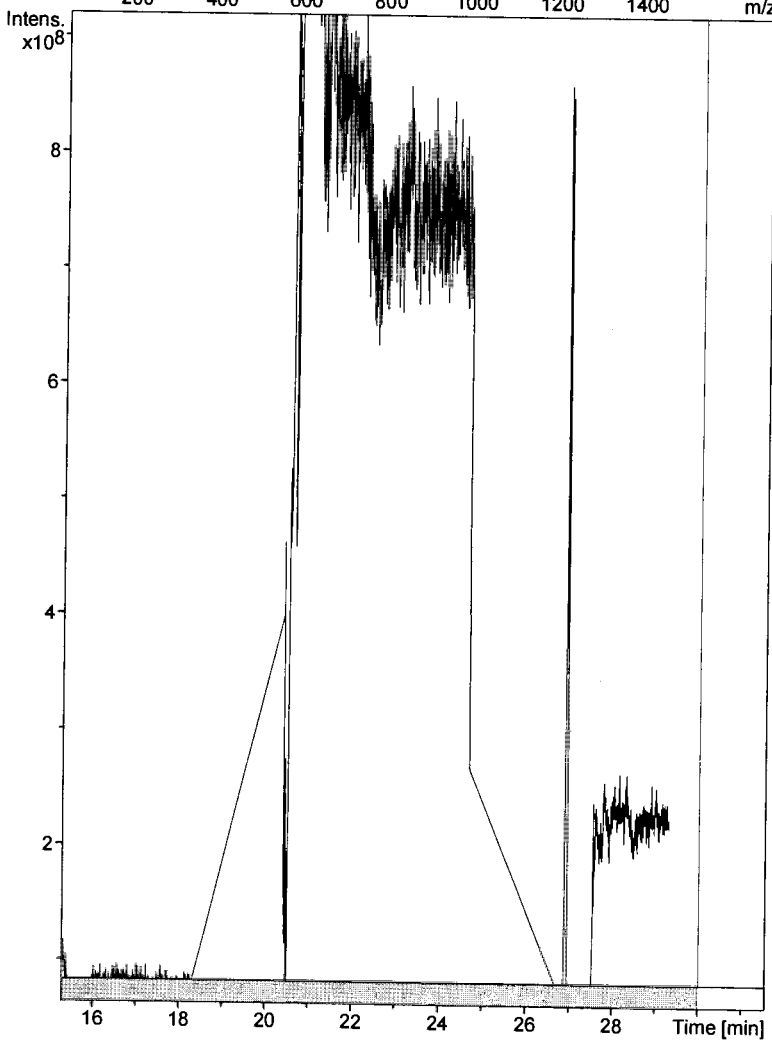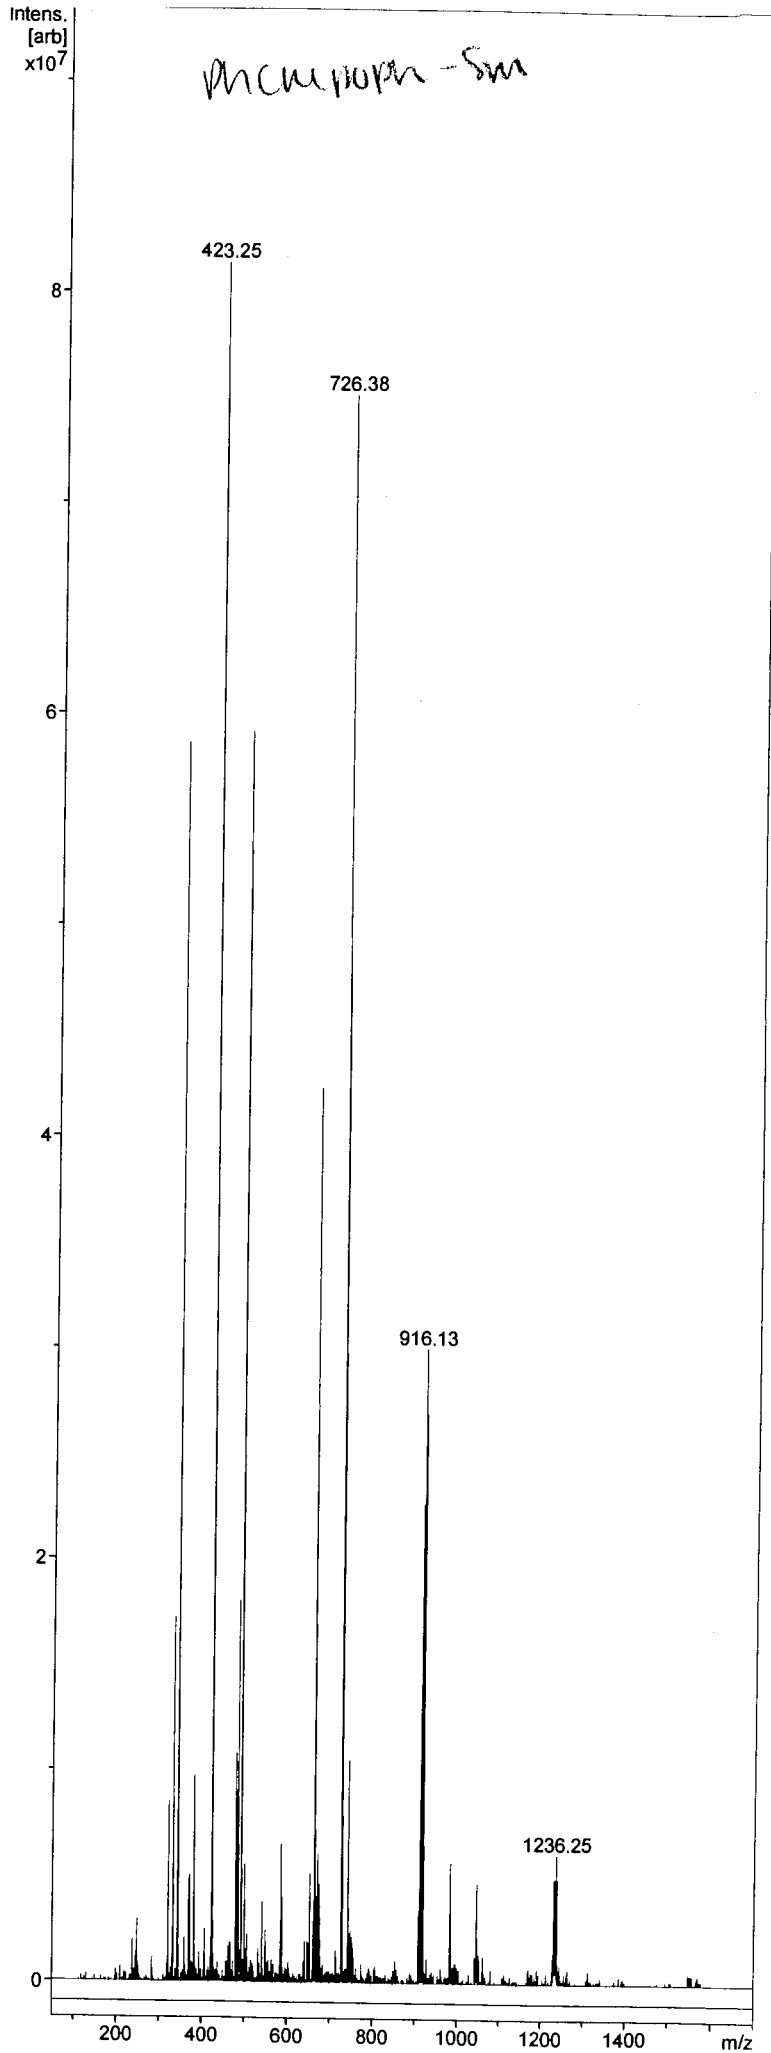

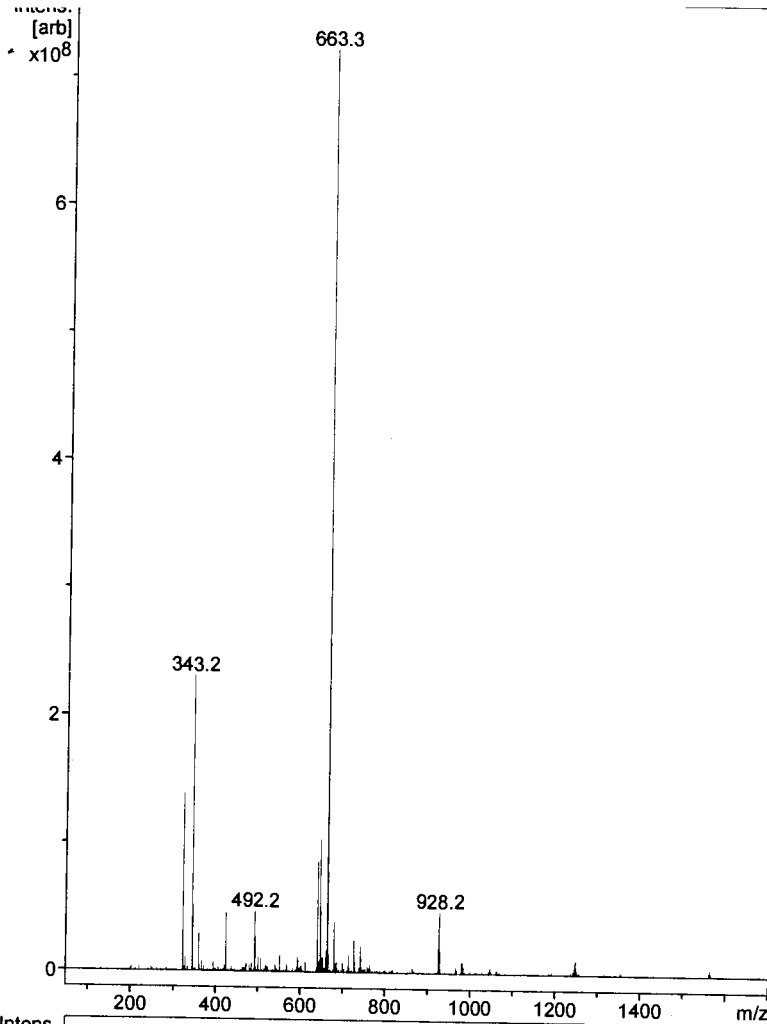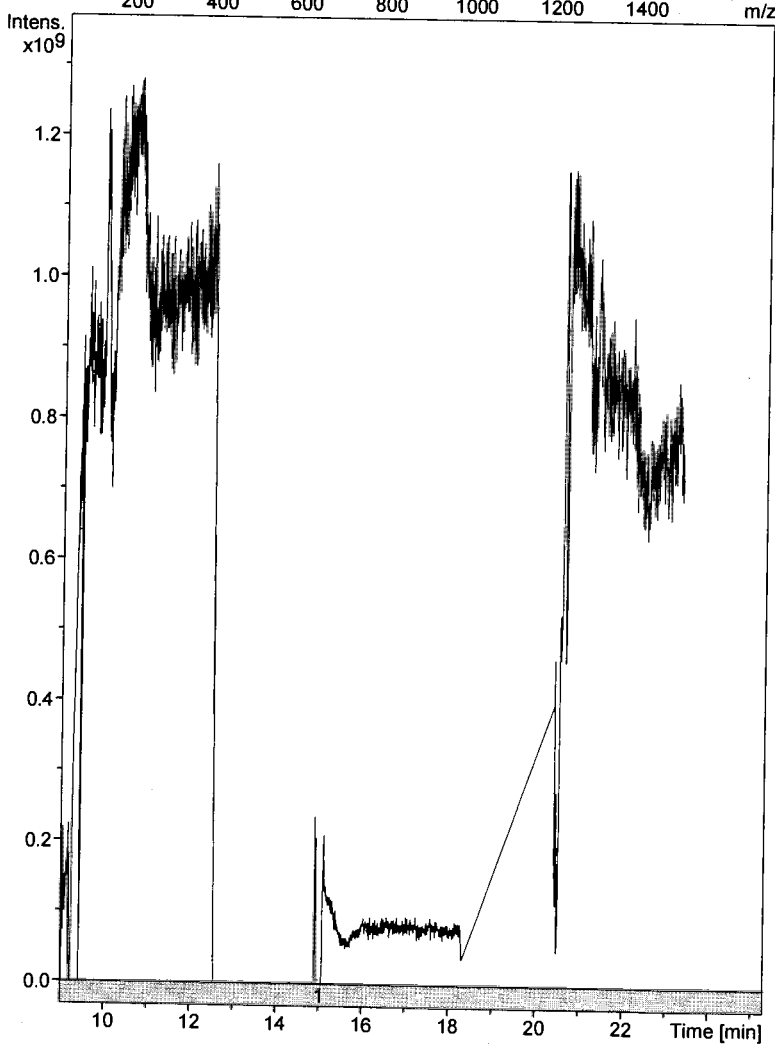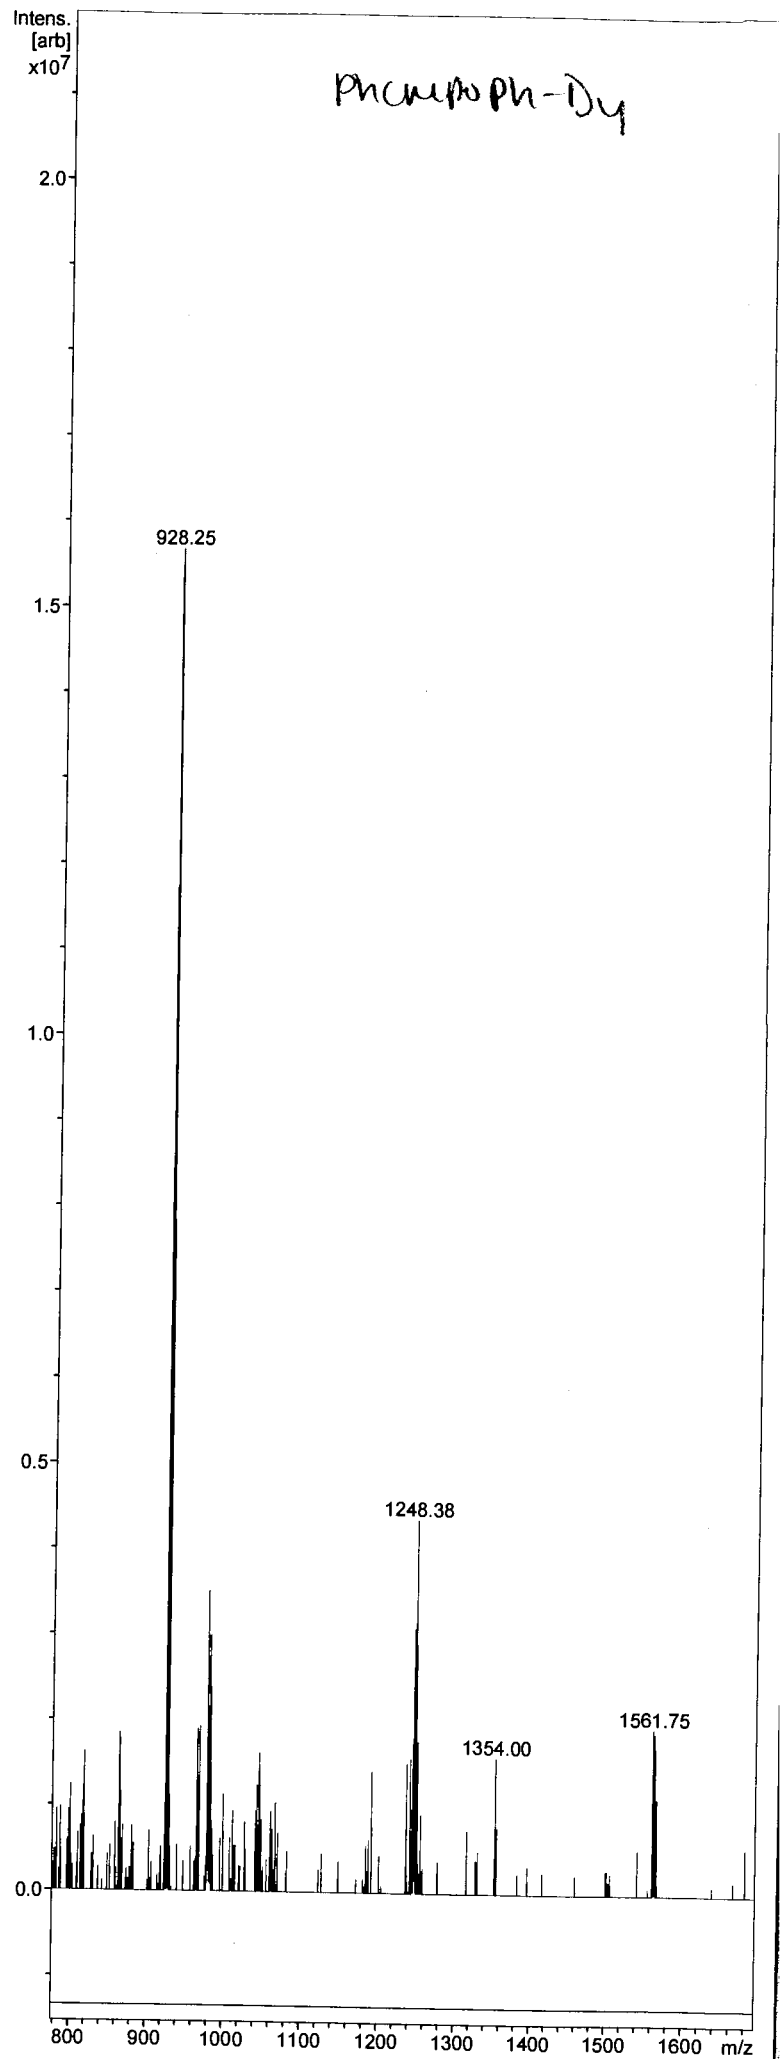



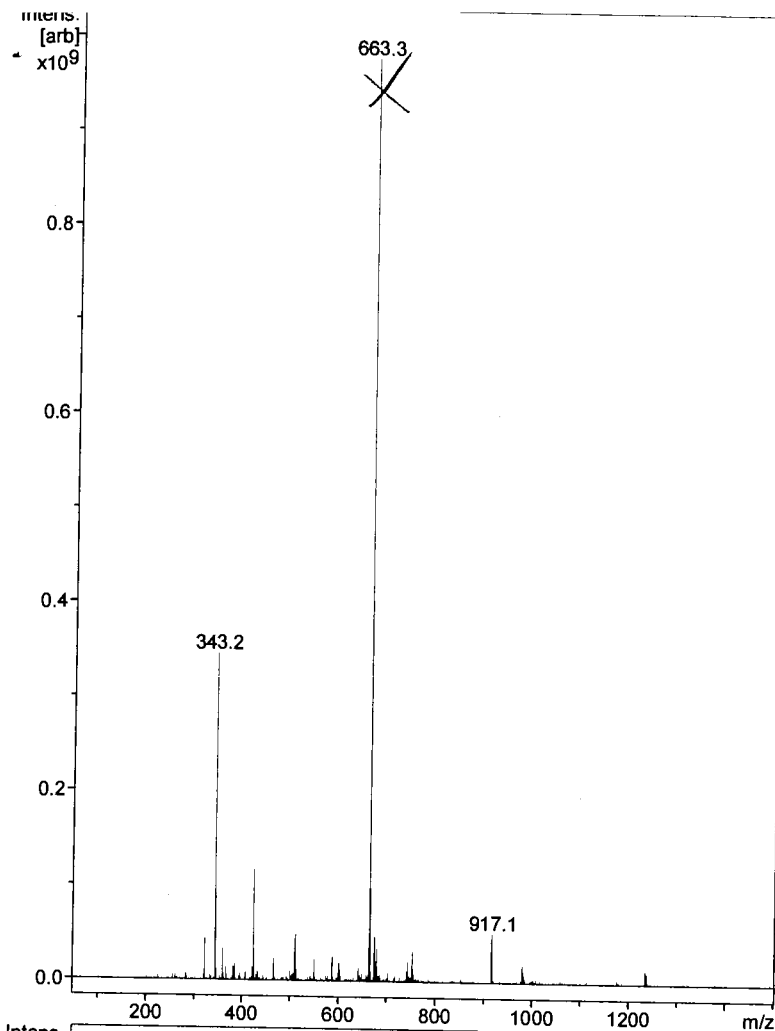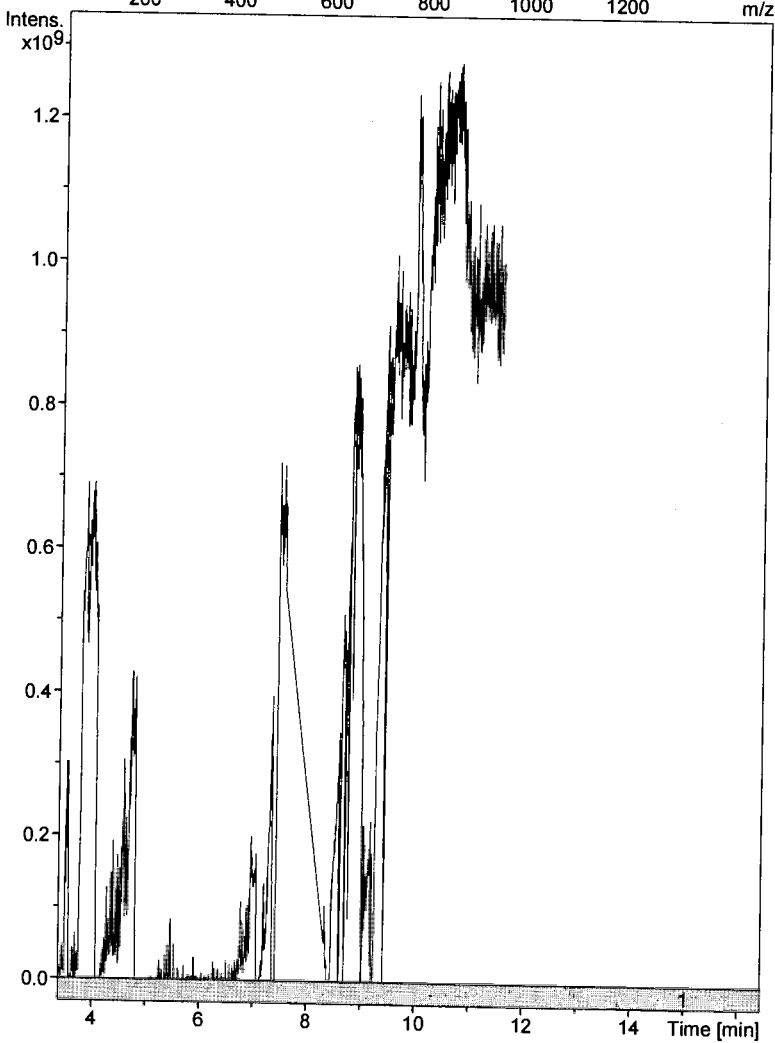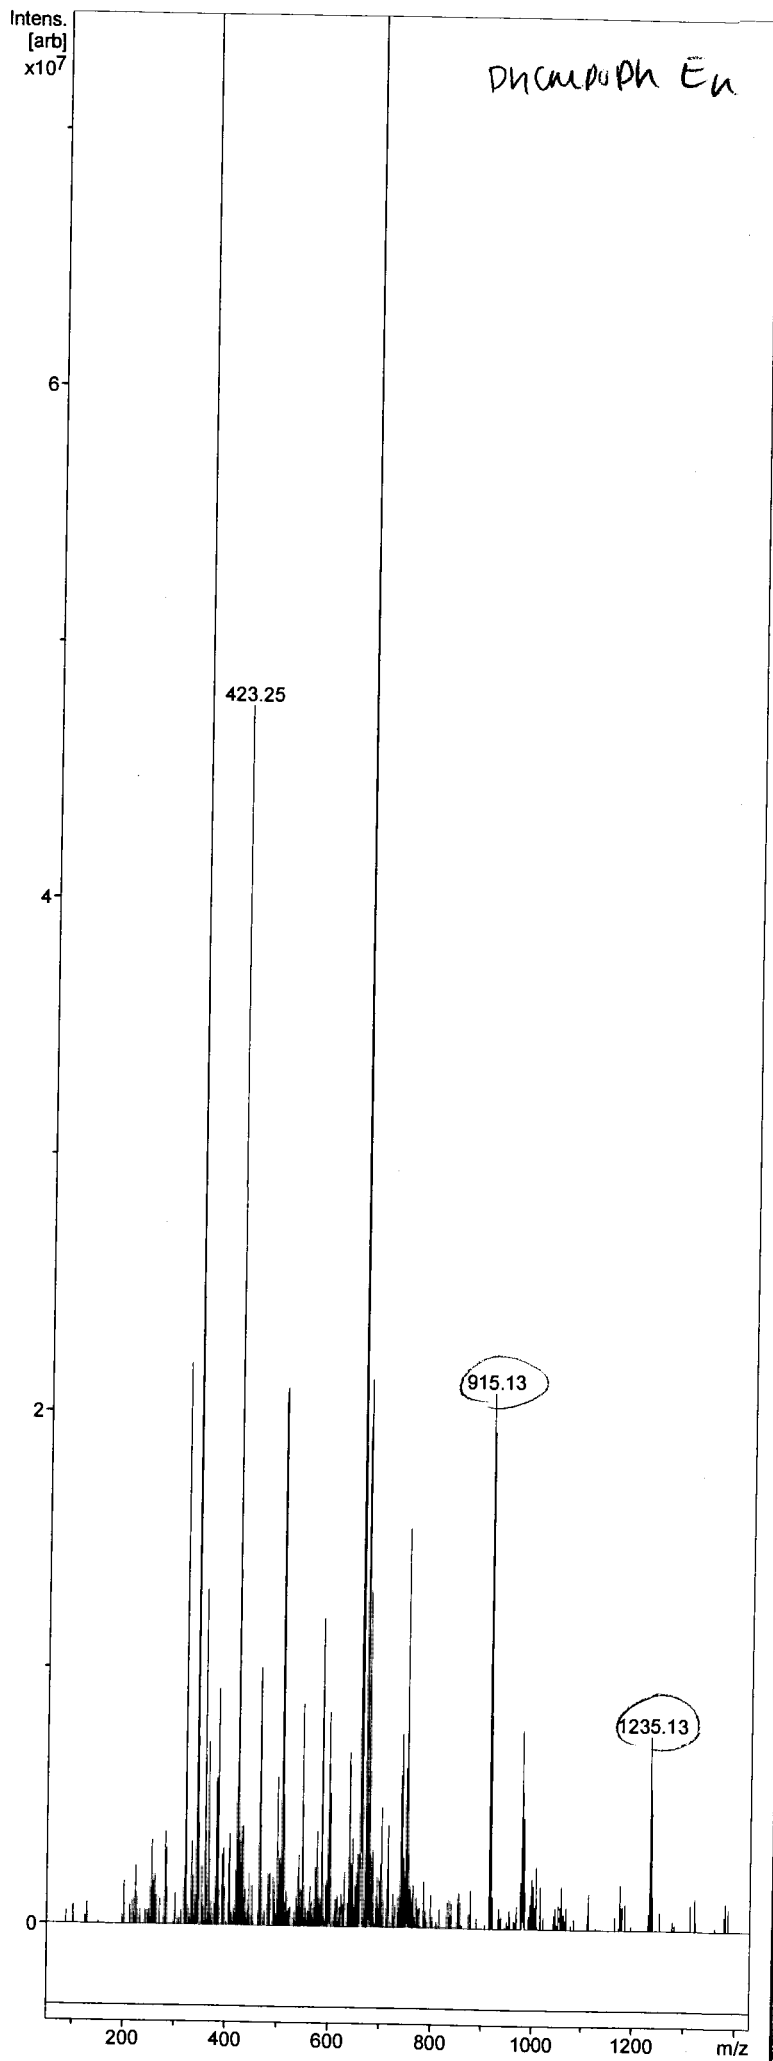

Supplement: c7dt02678a1.pdf [file c7dt02678a1.pdf]
